# Supplementary material for: Machine learning constructs a T cell-related signature for predicting prognosis and drug sensitivity in ovarian cancer
Source: publisher site journal article supplement (doi:10.18632/aging.205536), 2024-02-09
Supplement: Supplementary file [file aging-v16i4-205536-supplementary-material-SD3.pdf]

## SUPPLEMENTARY TABLES

**Supplementary Table 2. Univariate cox analysis identified 26 potential prognostic T cell-related markers.**

| <b>Id</b> | <b>HR</b>   | <b>HR.95L</b> | <b>HR.95H</b> | <b>p-value</b> |
|-----------|-------------|---------------|---------------|----------------|
| CD2       | 0.865360154 | 0.773310799   | 0.968366402   | 0.011730077    |
| CD96      | 0.81848001  | 0.682359338   | 0.981754759   | 0.030898357    |
| CD3D      | 0.855767714 | 0.761840568   | 0.961275117   | 0.00864525     |
| CD3G      | 0.745756741 | 0.622389088   | 0.893577871   | 0.001475151    |
| PYHIN1    | 0.790027811 | 0.624398349   | 0.999592558   | 0.049604496    |
| IL2RG     | 0.880170893 | 0.789195015   | 0.981634178   | 0.021850169    |
| CD3E      | 0.847826179 | 0.731858414   | 0.982169796   | 0.027828459    |
| TMSB4X    | 0.830523565 | 0.700504437   | 0.984675264   | 0.03253733     |
| EVL       | 0.773898077 | 0.609409003   | 0.982785338   | 0.035518711    |
| CXCR4     | 0.84538217  | 0.739302911   | 0.966682266   | 0.014076995    |
| CALM1     | 0.772908781 | 0.634598006   | 0.941364419   | 0.010448589    |
| EGR1      | 1.123864428 | 1.004779747   | 1.257062811   | 0.041012343    |
| TSC22D1   | 1.245954265 | 1.024908258   | 1.514674137   | 0.027322858    |
| EMP1      | 1.352393712 | 1.138702904   | 1.606186079   | 0.000581297    |
| IFI27     | 0.913242335 | 0.846203341   | 0.985592377   | 0.019646104    |
| PFN1      | 0.728993077 | 0.55948889    | 0.949850686   | 0.019231486    |
| TCEAL4    | 0.788075267 | 0.635526762   | 0.977240714   | 0.030029456    |
| EPCAM     | 0.833101003 | 0.716145292   | 0.969157081   | 0.017987523    |
| TIMP3     | 1.160659569 | 1.043456987   | 1.291026512   | 0.006084275    |
| CFI       | 0.848911225 | 0.738890634   | 0.975313848   | 0.020727341    |
| APBB2     | 1.246524579 | 1.007132053   | 1.542820052   | 0.042838551    |
| SERPINB9  | 0.806424564 | 0.65568386    | 0.991820322   | 0.041574256    |
| ISG20     | 0.755275505 | 0.644744872   | 0.88475475    | 0.000507656    |
| IGFBP7    | 0.802360401 | 0.684443615   | 0.940592035   | 0.00662439     |
| GBP2      | 0.863193103 | 0.753796435   | 0.988466247   | 0.033358176    |
| NPAS3     | 0.853256562 | 0.736786745   | 0.988137702   | 0.034062684    |

**Supplementary Table 3. Other models had been established for ovarian cancer.**

| <b>Signature</b> | <b>Title</b>                                                                                                                                                                     | <b>PMID</b>              |
|------------------|----------------------------------------------------------------------------------------------------------------------------------------------------------------------------------|--------------------------|
| An               | Development of a Novel Autophagy-related Prognostic Signature for Serous Ovarian Cancer                                                                                          | <a href="#">30410611</a> |
| Any              | The Comprehensive Analysis of Interferon-Related Prognostic Signature with regard to Immune Features in Ovarian Cancer.                                                          | <a href="#">35769811</a> |
| Bi               | Establishment of a novel glycolysis-related prognostic gene signature for ovarian cancer and its relationships with immune infiltration of the tumor microenvironment            | <a href="#">34496868</a> |
| Chaofan          | Establishment and validation of an RNA binding protein-associated prognostic model for ovarian cancer                                                                            | <a href="#">33550985</a> |
| Chen             | Integrating cell cycle score for precise risk stratification in ovarian cancer                                                                                                   | <a href="#">36061171</a> |
| Cheng            | Construction and validation of a transcription factors-based prognostic signature for ovarian cancer.                                                                            | <a href="#">35227285</a> |
| Fan              | A newly defined risk signature, consisting of three m6A RNA methylation regulators, predicts the prognosis of ovarian cancer                                                     | <a href="#">32950970</a> |
| Fei              | Construction autophagy-related prognostic risk signature to facilitate survival prediction, individual treatment and biomarker excavation of epithelial ovarian cancer patients. | <a href="#">33676525</a> |
| Hu               | Identification of a five-gene signature of the RGS gene family with prognostic value in ovarian cancer.                                                                          | <a href="#">33845140</a> |

|              |                                                                                                                                                    |                          |
|--------------|----------------------------------------------------------------------------------------------------------------------------------------------------|--------------------------|
| Huan         | Integrated Analysis of Ferroptosis-Related Biomarker Signatures to Improve the Diagnosis and Prognosis Prediction of Ovarian Cancer                | <a href="#">35071242</a> |
| Huo          | Identification of a Prognostic Signature for Ovarian Cancer Based on the Microenvironment Genes                                                    | <a href="#">34054929</a> |
| Jin          | A panel of three oxidative stress-related genes predicts overall survival in ovarian cancer patients received platinum-based chemotherapy          | <a href="#">29910195</a> |
| JinC         | A 2-Protein Signature Predicting Clinical Outcome in High-Grade Serous Ovarian Cancer                                                              | <a href="#">28976449</a> |
| Jinwei       | Identification and verification of a ten-gene signature predicting overall survival for ovarian cancer                                             | <a href="#">32805252</a> |
| Khadirnaikar | Development and validation of an immune prognostic signature for ovarian carcinoma                                                                 | <a href="#">32794637</a> |
| Lei          | Identification of an energy metabolism-related gene signature in ovarian cancer prognosis                                                          | <a href="#">32186777</a> |
| Leilei       | Establishment and validation of a novel invasion-related gene signature for predicting the prognosis of ovarian cancer.                            | <a href="#">35292033</a> |
| Liang        | A Novel Glycosyltransferase-Related Gene Signature for Overall Survival Prediction in Patients with Ovarian Cancer                                 | <a href="#">34992448</a> |
| Lin          | A methylation-driven genes prognostic signature and the immune microenvironment in epithelial ovarian cancer.                                      | <a href="#">35783253</a> |
| Liu          | Construction and validation of a novel aging-related gene signature and prognostic nomogram for predicting the overall survival in ovarian cancer. | <a href="#">34825509</a> |
| Lixiao       | Construction and Validation of a Novel Glycometabolism-Related Gene Signature Predicting Survival in Patients With Ovarian Cancer.                 | <a href="#">33281878</a> |
| Nie          | Prognostic signature of ovarian cancer based on 14 tumor microenvironment-related genes                                                            | <a href="#">34260536</a> |
| Pan          | A Potential Immune-Related Long Non-coding RNA Prognostic Signature for Ovarian Cancer                                                             | <a href="#">34367253</a> |
| Pan          | A Novel Six-Gene Signature for Prognosis Prediction in Ovarian Cancer                                                                              | <a href="#">33193589</a> |
| Qiu          | A Liquid-Liquid Phase Separation-Related Gene Signature as Prognostic Biomarker for Epithelial Ovarian Cancer                                      | <a href="#">34168991</a> |
