# Supplementary material for: Machine learning constructs a T cell-related signature for predicting prognosis and drug sensitivity in ovarian cancer
Source: Aging (Albany NY). 2024 Feb 9;16(4):3332–49. doi: 10.18632/aging.205536 (PMC10929824; doi:10.18632/aging.205536)
Supplement: Supplementary Table 1 [file aging-16-205536-s002.xls]

## Sheet: 04.cellMarkers
Supplementary Table 1. Cell markers identified by single cell analysis.
p_val	avg_log2FC	pct.1	pct.2	p_val_adj	cluster	gene
0	3.52084	0.67	0.146	0	Chondrocytes	C12orf60
0	3.46391	0.414	0.024	0	Chondrocytes	SFRP2
0	3.45439	0.66	0.136	0	Chondrocytes	MGP
0	3.34035	0.302	0.037	0	Chondrocytes	CXCL14
0	3.14471	0.57	0.092	0	Chondrocytes	LUM
0	3.03365	0.759	0.231	0	Chondrocytes	COL3A1
0	2.99623	0.788	0.333	0	Chondrocytes	COL1A2
0	2.90693	0.676	0.237	0	Chondrocytes	COL1A1
0	2.89506	0.711	0.16	0	Chondrocytes	DCN
0	2.8045	0.807	0.237	0	Chondrocytes	FN1
0	2.76818	0.606	0.095	0	Chondrocytes	VCAN
0	2.7059	0.322	0.031	0	Chondrocytes	SFRP4
0	2.63538	0.576	0.098	0	Chondrocytes	COL6A3
0	2.62999	0.868	0.248	0	Chondrocytes	SPARC
0	2.59871	0.588	0.115	0	Chondrocytes	TIMP3
0	2.56459	0.319	0.048	0	Chondrocytes	EPDR1
0	2.50408	0.549	0.09	0	Chondrocytes	COL8A1
0	2.49781	0.665	0.106	0	Chondrocytes	AEBP1
0	2.48028	0.386	0.072	0	Chondrocytes	POSTN
0	2.46818	0.457	0.047	0	Chondrocytes	COL11A1
0	2.4347	0.507	0.092	0	Chondrocytes	COL14A1
0	2.39911	0.498	0.073	0	Chondrocytes	FMOD
0	2.36156	0.577	0.056	0	Chondrocytes	CTSK
0	2.36017	0.44	0.054	0	Chondrocytes	PTN
0	2.29174	0.624	0.136	0	Chondrocytes	COL5A2
0	2.27722	0.573	0.056	0	Chondrocytes	ISLR
0	2.22406	0.299	0.032	0	Chondrocytes	INHBA
0	2.21879	0.472	0.073	0	Chondrocytes	CTHRC1
0	2.11105	0.454	0.039	0	Chondrocytes	PRELP
0	2.05717	0.621	0.098	0	Chondrocytes	BGN
0	2.0174	0.522	0.06	0	Chondrocytes	PRRX1
0	2.00784	0.553	0.11	0	Chondrocytes	COL6A1
0	1.98338	0.41	0.072	0	Chondrocytes	THBS2
0	1.98176	0.706	0.166	0	Chondrocytes	TIMP2
0	1.95017	0.63	0.113	0	Chondrocytes	PCOLCE
0	1.93649	0.617	0.198	0	Chondrocytes	EMP1
0	1.9328	0.566	0.215	0	Chondrocytes	CTGF
0	1.87698	0.725	0.203	0	Chondrocytes	C1S
0	1.81564	0.384	0.072	0	Chondrocytes	BX322234.1
0	1.73407	0.634	0.216	0	Chondrocytes	NNMT
0	1.73318	0.53	0.117	0	Chondrocytes	CFH
0	1.70289	0.674	0.311	0	Chondrocytes	CYR61
0	1.6914	0.837	0.386	0	Chondrocytes	CALD1
0	1.62557	0.465	0.126	0	Chondrocytes	ANTXR1
0	1.61	0.474	0.092	0	Chondrocytes	COL6A2
0	1.59788	0.404	0.081	0	Chondrocytes	CDH11
0	1.56744	0.957	0.59	0	Chondrocytes	VIM
0	1.52512	0.417	0.073	0	Chondrocytes	MMP2
0	1.49446	0.374	0.04	0	Chondrocytes	COLEC12
0	1.48931	0.351	0.058	0	Chondrocytes	FBN1
0	1.42739	0.873	0.532	0	Chondrocytes	EGR1
0	1.40321	0.685	0.241	0	Chondrocytes	C1R
0	1.38464	0.6	0.191	0	Chondrocytes	CAVIN1
0	1.38106	0.394	0.074	0	Chondrocytes	CPXM1
0	1.34329	0.424	0.103	0	Chondrocytes	FSTL1
0	1.33508	0.828	0.482	0	Chondrocytes	AC022217.3
0	1.12797	0.606	0.174	0	Chondrocytes	CCDC80
1.07999e-305	1.25583	0.399	0.092	1.73219e-301	Chondrocytes	DDR2
1.61409e-303	1.21215	0.69	0.333	2.58883e-299	Chondrocytes	SERPING1
1.04713e-299	1.34755	0.493	0.152	1.67949e-295	Chondrocytes	LAMB1
2.3791e-290	1.49983	0.388	0.091	3.81584e-286	Chondrocytes	COL5A1
1.1746e-284	1.48873	0.321	0.056	1.88394e-280	Chondrocytes	FAP
6.50532e-283	1.45051	0.448	0.134	1.04339e-278	Chondrocytes	PRKG1
2.71793e-277	1.42929	0.369	0.082	4.35929e-273	Chondrocytes	GEM
1.73282e-275	1.21877	0.698	0.403	2.77928e-271	Chondrocytes	LAPTM4A
1.38791e-271	1.25629	0.33	0.065	2.22607e-267	Chondrocytes	MFAP4
4.15027e-269	-5.1748	0.164	0.548	6.65662e-265	Chondrocytes	IGKC
9.07658e-267	1.28124	0.361	0.086	1.45579e-262	Chondrocytes	MMP14
2.66117e-265	1.42091	0.354	0.081	4.26826e-261	Chondrocytes	HTRA1
3.68824e-265	1.09934	0.854	0.617	5.91557e-261	Chondrocytes	RPL7
3.36538e-263	1.00904	0.819	0.478	5.39773e-259	Chondrocytes	AC136475.1
3.24792e-257	1.11061	0.822	0.549	5.20934e-253	Chondrocytes	DUSP1
2.14492e-253	-2.05436	0.075	0.409	3.44024e-249	Chondrocytes	EPCAM
9.04738e-249	1.58022	0.374	0.101	1.45111e-244	Chondrocytes	CRISPLD2
1.80473e-248	1.59888	0.354	0.085	2.89461e-244	Chondrocytes	PDLIM3
2.22843e-248	1.10846	0.363	0.091	3.57418e-244	Chondrocytes	THY1
3.61639e-248	1.40442	0.465	0.153	5.80032e-244	Chondrocytes	SPARCL1
4.99549e-244	1.83774	0.404	0.117	8.01226e-240	Chondrocytes	SERPINE1
4.3383e-242	1.59991	0.405	0.125	6.95821e-238	Chondrocytes	IGFBP5
3.77278e-241	1.25392	0.357	0.089	6.05116e-237	Chondrocytes	BICC1
1.78604e-238	1.07513	0.32	0.069	2.86462e-234	Chondrocytes	MEG3
4.11283e-235	1.80646	0.417	0.144	6.59657e-231	Chondrocytes	CENPP
1.89772e-234	1.16061	0.267	0.046	3.04375e-230	Chondrocytes	COL16A1
1.35609e-232	-1.8434	0.024	0.326	2.17503e-228	Chondrocytes	ELF3
3.14386e-231	1.06583	0.311	0.068	5.04244e-227	Chondrocytes	OLFML3
1.88765e-228	1.58599	0.304	0.07	3.0276e-224	Chondrocytes	SERPINE2
6.63017e-224	1.123	0.615	0.341	1.06341e-219	Chondrocytes	HDLBP
4.21478e-223	1.71707	0.386	0.12	6.76008e-219	Chondrocytes	THBS1
1.912e-222	1.05374	0.281	0.056	3.06665e-218	Chondrocytes	CLMP
6.32564e-222	-1.34656	0.158	0.491	1.01457e-217	Chondrocytes	UQCRH
3.99144e-221	1.16607	0.385	0.119	6.40187e-217	Chondrocytes	PMP22
4.43381e-221	1.10483	0.51	0.206	7.11138e-217	Chondrocytes	LIMA1
1.16964e-219	-1.5851	0.012	0.297	1.87599e-215	Chondrocytes	CLDN3
8.43619e-216	1.05703	0.649	0.376	1.35308e-211	Chondrocytes	CALU
4.04877e-215	1.40277	0.44	0.164	6.49383e-211	Chondrocytes	RARRES2
1.37206e-213	-2.38189	0.022	0.304	2.20065e-209	Chondrocytes	PTPRC
1.86974e-212	1.29864	0.356	0.105	2.99888e-208	Chondrocytes	MAP1B
1.95767e-212	1.1037	0.698	0.434	3.1399e-208	Chondrocytes	LMNA
9.13953e-208	1.09193	0.393	0.137	1.46589e-203	Chondrocytes	CYBRD1
1.07057e-206	1.0858	0.352	0.108	1.71709e-202	Chondrocytes	MRC2
3.48206e-204	1.50468	0.479	0.221	5.58488e-200	Chondrocytes	KLF10
2.12117e-200	1.05642	0.492	0.218	3.40215e-196	Chondrocytes	FGFR1
6.4047e-198	1.20166	0.501	0.238	1.02725e-193	Chondrocytes	GOLIM4
2.14855e-197	-1.27464	0.026	0.301	3.44606e-193	Chondrocytes	RBM47
3.68828e-194	1.4447	0.415	0.164	5.91564e-190	Chondrocytes	PALLD
2.94177e-192	-1.10348	0.034	0.307	4.71831e-188	Chondrocytes	VAMP8
3.19344e-192	1.08506	0.558	0.281	5.12197e-188	Chondrocytes	TUBA1A
5.7141e-188	1.00558	0.3	0.078	9.16485e-184	Chondrocytes	LHFPL6
6.51504e-187	-1.23247	0.732	0.901	1.04495e-182	Chondrocytes	TMSB4X
2.05332e-185	1.27982	0.302	0.084	3.29332e-181	Chondrocytes	SERPINF1
7.59923e-182	-1.85593	0.184	0.46	1.21884e-177	Chondrocytes	WFDC2
2.34878e-181	1.0948	0.485	0.224	3.76721e-177	Chondrocytes	SPATS2L
1.98843e-179	-3.00306	0.03	0.28	3.18924e-175	Chondrocytes	RGS1
1.13173e-178	-1.58478	0.022	0.271	1.81517e-174	Chondrocytes	CXCR4
4.90401e-178	1.33819	0.504	0.253	7.86554e-174	Chondrocytes	TPM1
6.91772e-177	-2.18363	0.092	0.366	1.10953e-172	Chondrocytes	HLA.DPA1
9.91858e-177	1.89373	0.672	0.428	1.59084e-172	Chondrocytes	CLU
2.70576e-176	1.24787	0.424	0.183	4.33977e-172	Chondrocytes	SOCS3
3.69866e-176	1.02912	0.432	0.179	5.93227e-172	Chondrocytes	NUPR1
5.01718e-175	1.17994	0.747	0.519	8.04706e-171	Chondrocytes	CST3
1.07442e-168	-1.31666	0.034	0.281	1.72326e-164	Chondrocytes	CD24
2.99721e-167	1.11233	0.306	0.092	4.80722e-163	Chondrocytes	C1orf54
6.76309e-167	-1.26844	0.165	0.449	1.08473e-162	Chondrocytes	FNBP1
1.30406e-164	1.3291	0.312	0.104	2.09158e-160	Chondrocytes	COL12A1
5.37357e-162	-1.23086	0.048	0.297	8.61867e-158	Chondrocytes	KRT19
3.51112e-159	1.65002	0.369	0.153	5.63149e-155	Chondrocytes	SULF1
3.99806e-156	1.11715	0.258	0.068	6.41248e-152	Chondrocytes	ACTA2
9.25876e-155	1.03272	0.366	0.153	1.48501e-150	Chondrocytes	NFIX
3.58045e-153	1.08122	0.36	0.135	5.74268e-149	Chondrocytes	ID3
2.97365e-151	1.01302	0.394	0.169	4.76944e-147	Chondrocytes	PLOD2
4.39813e-151	1.058	0.549	0.315	7.05417e-147	Chondrocytes	APP
3.79814e-146	-1.22791	0.344	0.583	6.09184e-142	Chondrocytes	CCSER1
4.72387e-146	1.20226	0.546	0.323	7.57661e-142	Chondrocytes	TSC22D1
1.32421e-144	-4.69866	0.114	0.364	2.1239e-140	Chondrocytes	IGHG1
2.83829e-142	-1.07763	0.052	0.28	4.55233e-138	Chondrocytes	CLDN4
5.06594e-142	-1.59446	0.403	0.639	8.12526e-138	Chondrocytes	CD74
7.83768e-142	-1.06202	0.058	0.287	1.25709e-137	Chondrocytes	RNASET2
2.17452e-141	1.06515	0.364	0.149	3.48772e-137	Chondrocytes	FBLN1
3.19692e-138	1.02964	0.329	0.129	5.12754e-134	Chondrocytes	DPYSL3
1.05257e-136	-1.08071	0.221	0.459	1.68822e-132	Chondrocytes	SLC25A5
1.58138e-136	1.25423	0.257	0.078	2.53638e-132	Chondrocytes	IGFBP3
1.00001e-133	1.08728	0.539	0.337	1.60392e-129	Chondrocytes	C6orf48
4.14267e-133	1.08098	0.557	0.34	6.64442e-129	Chondrocytes	GADD45B
5.272e-133	-2.05514	0.217	0.471	8.45576e-129	Chondrocytes	HLA.DRA
1.12535e-130	-1.16889	0.307	0.538	1.80495e-126	Chondrocytes	PFN1
4.84979e-130	-1.2085	0.13	0.366	7.77857e-126	Chondrocytes	TNFAIP2
4.37052e-128	-1.08765	0.14	0.38	7.00988e-124	Chondrocytes	KIAA1551
1.29608e-127	1.21632	0.397	0.199	2.07878e-123	Chondrocytes	CBR4
7.63172e-126	-1.29244	0.047	0.251	1.22405e-121	Chondrocytes	UGT2B7
1.94924e-124	1.35934	0.321	0.136	3.12639e-120	Chondrocytes	SEMA3C
3.60477e-124	-1.2029	0.063	0.275	5.78169e-120	Chondrocytes	CP
5.53675e-124	1.07936	0.323	0.131	8.8804e-120	Chondrocytes	NFATC2
6.32233e-123	-2.26008	0.132	0.341	1.01404e-118	Chondrocytes	SRGN
1.76948e-122	-1.28809	0.173	0.41	2.83807e-118	Chondrocytes	C1orf186
1.87212e-117	-1.37096	0.127	0.344	3.00269e-113	Chondrocytes	ESR1
1.09935e-116	1.21012	0.29	0.114	1.76325e-112	Chondrocytes	ID1
5.62393e-112	-1.2027	0.286	0.498	9.02022e-108	Chondrocytes	UBE2D2
5.64572e-107	-1.68526	0.139	0.348	9.05517e-103	Chondrocytes	HLA.DPB1
9.77143e-107	-1.62329	0.2	0.427	1.56724e-102	Chondrocytes	HLA.DRB1
3.52869e-106	-1.10872	0.191	0.409	5.65966e-102	Chondrocytes	BST2
8.60316e-106	-1.03871	0.122	0.329	1.37986e-101	Chondrocytes	DSP
1.46426e-103	-1.34606	0.098	0.294	2.34853e-99	Chondrocytes	CYC1
4.68794e-103	-1.10023	0.101	0.301	7.51899e-99	Chondrocytes	CDC42SE2
9.07539e-101	-1.07135	0.094	0.289	1.4556e-96	Chondrocytes	ST6GAL1
9.88439e-100	1.06603	0.41	0.239	1.58536e-95	Chondrocytes	45180
6.8722e-99	-1.29239	0.135	0.33	1.10223e-94	Chondrocytes	HMGB2
5.1142e-93	-1.42633	0.343	0.517	8.20266e-89	Chondrocytes	IFI27
8.53347e-88	1.11192	0.256	0.113	1.36868e-83	Chondrocytes	MATN2
1.13113e-85	-1.11093	0.175	0.357	1.81421e-81	Chondrocytes	ATP5J2
2.80927e-84	-1.56263	0.775	0.815	4.50579e-80	Chondrocytes	RPL8
5.3131e-83	-1.08174	0.107	0.278	8.52169e-79	Chondrocytes	45175
1.92367e-82	-1.07182	0.396	0.537	3.08537e-78	Chondrocytes	HSPB1
9.94567e-78	-1.26686	0.164	0.332	1.59519e-73	Chondrocytes	LY6E
4.51347e-77	-1.07449	0.174	0.35	7.23915e-73	Chondrocytes	BTG1
6.48945e-76	1.04298	0.277	0.137	1.04084e-71	Chondrocytes	ERRFI1
1.25131e-73	-1.09744	0.171	0.34	2.00698e-69	Chondrocytes	H2AFZ
8.58458e-72	1.05914	0.283	0.144	1.37688e-67	Chondrocytes	KIF26B
1.06991e-62	-1.38289	0.146	0.294	1.71603e-58	Chondrocytes	NPAS3
4.04639e-48	-1.01515	0.881	0.899	6.49e-44	Chondrocytes	RPS3
2.64535e-28	1.01543	0.563	0.48	4.24288e-24	Chondrocytes	MT2A
0	2.62375	0.725	0.054	0	Epithelial_cells	ELF3
0	2.54822	0.458	0.088	0	Epithelial_cells	LINC00621
0	2.5153	0.812	0.164	0	Epithelial_cells	C1orf186
0	2.46417	0.809	0.124	0	Epithelial_cells	EPCAM
0	2.45637	0.904	0.766	0	Epithelial_cells	RPL8
0	2.42004	0.835	0.327	0	Epithelial_cells	IFI27
0	2.36501	0.823	0.212	0	Epithelial_cells	WFDC2
0	2.32414	0.386	0.04	0	Epithelial_cells	SCGB2A1
0	2.16498	0.629	0.057	0	Epithelial_cells	CLDN3
0	2.12898	0.53	0.126	0	Epithelial_cells	CYC1
0	2.07928	0.614	0.056	0	Epithelial_cells	CD24
0	2.04242	0.496	0.033	0	Epithelial_cells	CDKN2A
0	2.00142	0.561	0.082	0	Epithelial_cells	CP
0	1.97916	0.458	0.034	0	Epithelial_cells	MUC16
0	1.97105	0.549	0.183	0	Epithelial_cells	LY6E
0	1.86326	0.666	0.158	0	Epithelial_cells	TNFAIP2
0	1.8557	0.645	0.127	0	Epithelial_cells	DSP
0	1.80109	0.674	0.222	0	Epithelial_cells	BST2
0	1.78442	0.564	0.076	0	Epithelial_cells	MUC1
0	1.78005	0.49	0.079	0	Epithelial_cells	UGT2B7
0	1.75828	0.483	0.061	0	Epithelial_cells	ASRGL1
0	1.7181	0.577	0.091	0	Epithelial_cells	KRT19
0	1.71149	0.395	0.012	0	Epithelial_cells	S100A14
0	1.70041	0.48	0.044	0	Epithelial_cells	KRT7
0	1.69363	0.566	0.204	0	Epithelial_cells	ATP5J2
0	1.68282	0.41	0.023	0	Epithelial_cells	BTNL9
0	1.67356	0.586	0.073	0	Epithelial_cells	CLDN4
0	1.66746	0.352	0.019	0	Epithelial_cells	TACSTD2
0	1.61903	0.414	0.046	0	Epithelial_cells	SLC39A4
0	1.58828	0.787	0.387	0	Epithelial_cells	HSPB1
0	1.55171	0.92	0.729	0	Epithelial_cells	S100A6
0	1.54727	0.796	0.443	0	Epithelial_cells	ATP5G3
0	1.53303	0.679	0.215	0	Epithelial_cells	S100A13
0	1.52634	0.73	0.265	0	Epithelial_cells	UQCRH
0	1.46084	0.721	0.321	0	Epithelial_cells	NDUFB9
0	1.43087	0.282	0.019	0	Epithelial_cells	MT1G
0	1.4196	0.734	0.323	0	Epithelial_cells	UBE2D2
0	1.41016	0.621	0.203	0	Epithelial_cells	NDUFC2
0	1.39642	0.387	0.039	0	Epithelial_cells	KLK7
0	1.3873	0.372	0.018	0	Epithelial_cells	SLC34A2
0	1.35011	0.948	0.916	0	Epithelial_cells	MT.CO3
0	1.32996	0.389	0.029	0	Epithelial_cells	EHF
0	1.32347	0.595	0.157	0	Epithelial_cells	SLPI
0	1.31595	0.498	0.123	0	Epithelial_cells	AK2
0	1.3053	0.542	0.147	0	Epithelial_cells	LAPTM4B
0	1.30273	0.613	0.167	0	Epithelial_cells	PAX8.AS1
0	1.30217	0.71	0.288	0	Epithelial_cells	CD9
0	1.29756	0.744	0.39	0	Epithelial_cells	C14orf2
0	1.27992	0.628	0.16	0	Epithelial_cells	PAX8
0	1.25232	0.69	0.235	0	Epithelial_cells	SPINT2
0	1.24194	0.39	0.074	0	Epithelial_cells	DEPTOR
0	1.23701	0.464	0.106	0	Epithelial_cells	PUF60
0	1.23222	0.421	0.083	0	Epithelial_cells	SQLE
0	1.22226	0.606	0.201	0	Epithelial_cells	KRT18
0	1.21879	0.402	0.046	0	Epithelial_cells	TNNT1
0	1.20118	0.473	0.107	0	Epithelial_cells	C8orf33
0	1.19842	0.408	0.054	0	Epithelial_cells	FOLR1
0	1.19187	0.431	0.088	0	Epithelial_cells	CHI3L1
0	1.16617	0.293	0.026	0	Epithelial_cells	MAL
0	1.16476	0.39	0.046	0	Epithelial_cells	PPP1R16A
0	1.16104	0.526	0.149	0	Epithelial_cells	MRPL13
0	1.15035	0.409	0.035	0	Epithelial_cells	MAL2
0	1.14212	0.375	0.038	0	Epithelial_cells	KRTCAP3
0	1.13164	0.362	0.019	0	Epithelial_cells	CLDN7
0	1.02968	0.505	0.138	0	Epithelial_cells	TSTD1
0	-1.90872	0.464	0.788	0	Epithelial_cells	VIM
0	-3.91543	0.122	0.549	0	Epithelial_cells	SPARC
1.20685e-305	1.26889	0.591	0.21	1.93566e-301	Epithelial_cells	PRKCI
2.45701e-305	-4.42343	0.106	0.495	3.9408e-301	Epithelial_cells	COL3A1
2.9802e-297	1.19794	0.794	0.476	4.77995e-293	Epithelial_cells	COX5B
1.10997e-293	1.32917	0.61	0.24	1.78028e-289	Epithelial_cells	UQCRFS1
4.04073e-291	1.12414	0.424	0.102	6.48092e-287	Epithelial_cells	ITGB8
1.90113e-288	1.06549	0.342	0.06	3.04922e-284	Epithelial_cells	CHCHD10
1.39722e-285	-1.81135	0.347	0.674	2.24101e-281	Epithelial_cells	AC022217.3
9.76157e-282	1.13332	0.51	0.162	1.56566e-277	Epithelial_cells	VPS28
1.62958e-281	1.33742	0.341	0.061	2.61368e-277	Epithelial_cells	EYA2
8.71965e-278	-2.33053	0.033	0.406	1.39854e-273	Epithelial_cells	SLC2A3
2.46922e-275	1.08472	0.544	0.176	3.96038e-271	Epithelial_cells	PATJ
1.61061e-274	-3.83985	0.059	0.424	2.58326e-270	Epithelial_cells	DCN
2.07128e-274	1.5579	0.306	0.048	3.32213e-270	Epithelial_cells	AL357507.1
6.60883e-274	1.11251	0.431	0.115	1.05999e-269	Epithelial_cells	GRINA
8.15268e-273	1.17082	0.812	0.538	1.30761e-268	Epithelial_cells	GSTP1
3.3178e-271	1.10603	0.354	0.071	5.32142e-267	Epithelial_cells	SAMD12
2.04511e-268	-1.14741	0.53	0.838	3.28014e-264	Epithelial_cells	AC100778.4
5.12381e-266	1.08457	0.519	0.168	8.21808e-262	Epithelial_cells	FAM60A
2.02202e-265	1.24802	0.321	0.057	3.24312e-261	Epithelial_cells	AC011483.2
1.14413e-262	1.21218	0.825	0.614	1.83507e-258	Epithelial_cells	COX6C
4.05911e-262	1.12186	0.647	0.292	6.5104e-258	Epithelial_cells	SLC25A5
3.24499e-260	-1.19939	0.555	0.804	5.20463e-256	Epithelial_cells	RPL21
2.29689e-257	1.04494	0.444	0.123	3.68398e-253	Epithelial_cells	FDFT1
4.07453e-254	1.04677	0.549	0.198	6.53514e-250	Epithelial_cells	FAM162A
1.20982e-250	-1.7787	0.024	0.368	1.94043e-246	Epithelial_cells	CCND2
1.15347e-246	-3.51039	0.045	0.385	1.85005e-242	Epithelial_cells	MGP
2.14943e-244	1.08613	0.504	0.169	3.44747e-240	Epithelial_cells	LINC00969
5.50526e-244	-3.58047	0.057	0.395	8.82989e-240	Epithelial_cells	C12orf60
6.43119e-243	-1.78912	0.079	0.42	1.0315e-238	Epithelial_cells	TIMP2
2.71335e-237	1.39354	0.392	0.107	4.35194e-233	Epithelial_cells	BNIP3
7.43681e-237	1.25312	0.52	0.19	1.19279e-232	Epithelial_cells	ESR1
1.48501e-236	-2.65979	0.164	0.498	2.38181e-232	Epithelial_cells	FN1
3.57065e-236	1.04897	0.449	0.141	5.72697e-232	Epithelial_cells	LSM4
2.52219e-234	1.25165	0.359	0.088	4.04534e-230	Epithelial_cells	FAAH2
2.84551e-224	1.36205	0.449	0.147	4.56392e-220	Epithelial_cells	NDRG1
3.34523e-224	1.21529	0.288	0.054	5.36541e-220	Epithelial_cells	C8orf4
3.1059e-223	1.08198	0.653	0.336	4.98155e-219	Epithelial_cells	COX7B
7.60504e-223	-1.08088	0.504	0.788	1.21977e-218	Epithelial_cells	AC135178.3
1.5753e-221	1.02878	0.722	0.413	2.52662e-217	Epithelial_cells	NDUFA1
5.06451e-221	-2.04374	0.043	0.36	8.12297e-217	Epithelial_cells	AEBP1
9.42529e-221	-4.08969	0.27	0.544	1.51172e-216	Epithelial_cells	COL1A2
4.75475e-220	1.04239	0.749	0.428	7.62614e-216	Epithelial_cells	ENO1
5.10961e-218	1.14722	0.902	0.793	8.19531e-214	Epithelial_cells	MT.ND6
2.87732e-217	1.05871	0.616	0.287	4.61493e-213	Epithelial_cells	SSBP1
5.39428e-217	1.13956	0.736	0.445	8.65189e-213	Epithelial_cells	SEM1
1.43173e-211	-3.90295	0.152	0.449	2.29634e-207	Epithelial_cells	COL1A1
4.84241e-211	1.23703	0.521	0.218	7.76674e-207	Epithelial_cells	URI1
3.09427e-204	-2.3651	0.032	0.329	4.9629e-200	Epithelial_cells	VCAN
1.67844e-203	1.26557	0.338	0.09	2.69205e-199	Epithelial_cells	TPRG1
8.87579e-203	1.42088	0.693	0.405	1.42359e-198	Epithelial_cells	HSPE1
1.20955e-202	-1.81877	0.041	0.334	1.94e-198	Epithelial_cells	BGN
1.42566e-201	1.07952	0.318	0.08	2.28661e-197	Epithelial_cells	INF2
7.39919e-201	1.14021	0.55	0.22	1.18676e-196	Epithelial_cells	MECOM
2.78778e-196	1.30473	0.506	0.205	4.47131e-192	Epithelial_cells	TNFSF10
2.82287e-196	-1.14752	0.754	0.839	4.5276e-192	Epithelial_cells	FOS
1.67832e-195	1.05446	0.311	0.075	2.69186e-191	Epithelial_cells	CHODL
1.57641e-192	-2.94115	0.03	0.311	2.52841e-188	Epithelial_cells	LUM
4.84496e-191	1.08517	0.351	0.105	7.77083e-187	Epithelial_cells	UCHL1
1.10331e-187	-2.11639	0.075	0.359	1.76959e-183	Epithelial_cells	COL5A2
4.73113e-184	1.07116	0.438	0.163	7.58826e-180	Epithelial_cells	KAZN
1.06055e-183	1.01392	0.407	0.138	1.70102e-179	Epithelial_cells	CKS2
2.31611e-180	-1.60301	0.009	0.269	3.71481e-176	Epithelial_cells	PRRX1
3.77944e-177	-1.63878	0.069	0.341	6.06185e-173	Epithelial_cells	PCOLCE
1.08327e-176	-2.60589	0.105	0.377	1.73745e-172	Epithelial_cells	CCDC80
2.38993e-175	-1.17909	0.82	0.885	3.83321e-171	Epithelial_cells	ACTB
6.65205e-174	-2.57678	0.079	0.351	1.06692e-169	Epithelial_cells	SRGN
8.4154e-174	1.0878	0.368	0.119	1.34975e-169	Epithelial_cells	USP53
9.41822e-168	-2.22567	0.053	0.311	1.51059e-163	Epithelial_cells	COL6A3
1.16545e-167	1.32793	0.613	0.346	1.86927e-163	Epithelial_cells	TPI1
2.24558e-167	-1.74603	0.028	0.281	3.60169e-163	Epithelial_cells	CTSK
4.49534e-165	-1.62491	0.054	0.313	7.21008e-161	Epithelial_cells	COL6A1
1.69353e-163	1.10938	0.57	0.279	2.71626e-159	Epithelial_cells	MEIS1
1.64524e-162	-1.57419	0.123	0.384	2.6388e-158	Epithelial_cells	CAVIN1
1.95916e-162	-1.52039	0.066	0.324	3.1423e-158	Epithelial_cells	LAMB1
3.22984e-162	-2.00587	0.041	0.293	5.18033e-158	Epithelial_cells	RGS2
5.65571e-158	1.34955	0.811	0.599	9.0712e-154	Epithelial_cells	NEAT1
3.56143e-156	-2.00768	0.049	0.294	5.71217e-152	Epithelial_cells	COL8A1
1.04259e-153	-1.84505	0.151	0.407	1.67222e-149	Epithelial_cells	ID2
3.20773e-153	-2.87351	0.069	0.313	5.14488e-149	Epithelial_cells	SPARCL1
8.98261e-150	-1.52317	0.063	0.307	1.44072e-145	Epithelial_cells	CFH
2.16749e-146	1.07393	0.653	0.402	3.47643e-142	Epithelial_cells	NDUFB2
1.34441e-145	-1.32378	0.037	0.27	2.1563e-141	Epithelial_cells	COL6A2
1.97246e-144	1.15424	0.42	0.175	3.16363e-140	Epithelial_cells	CLNS1A
3.33269e-141	-2.02325	0.415	0.561	5.3453e-137	Epithelial_cells	CALD1
3.50932e-141	-2.67705	0.039	0.264	5.6286e-137	Epithelial_cells	SERPINE1
1.26897e-140	1.46739	0.427	0.184	2.0353e-136	Epithelial_cells	NPAS3
3.77915e-137	1.22726	0.468	0.224	6.06138e-133	Epithelial_cells	H2AFZ
2.17047e-136	-2.16067	0.056	0.28	3.48122e-132	Epithelial_cells	PTPRC
3.15129e-135	-1.44642	0.147	0.381	5.05435e-131	Epithelial_cells	TCF4
1.17165e-130	-2.11273	0.074	0.295	1.87922e-126	Epithelial_cells	IGFBP7
1.20712e-130	-1.50624	0.038	0.252	1.9361e-126	Epithelial_cells	MEF2C
2.44648e-127	-2.08921	0.095	0.317	3.92391e-123	Epithelial_cells	TIMP3
5.94376e-127	-1.07186	0.047	0.259	9.5332e-123	Epithelial_cells	RHOBTB3
6.91002e-127	-1.65055	0.047	0.257	1.1083e-122	Epithelial_cells	FMOD
2.14305e-121	-1.0167	0.534	0.686	3.43723e-117	Epithelial_cells	ERCC1
1.18681e-117	-1.41485	0.063	0.266	1.90352e-113	Epithelial_cells	ISLR
1.53948e-114	-1.02225	0.309	0.509	2.46916e-110	Epithelial_cells	SHC4
4.19167e-113	1.17789	0.332	0.14	6.72302e-109	Epithelial_cells	CRYAB
1.67428e-111	-1.41808	0.149	0.352	2.68538e-107	Epithelial_cells	LIMA1
2.14433e-109	-1.09032	0.057	0.252	3.4393e-105	Epithelial_cells	FSTL1
8.79338e-108	-2.88564	0.066	0.256	1.41037e-103	Epithelial_cells	RGS1
6.19627e-107	-1.58122	0.178	0.38	9.93819e-103	Epithelial_cells	NR4A2
2.84816e-106	-1.02721	0.483	0.605	4.56816e-102	Epithelial_cells	45176
7.56699e-104	-1.18342	0.083	0.275	1.21367e-99	Epithelial_cells	ZEB1
2.31067e-93	-1.18637	0.111	0.291	3.70609e-89	Epithelial_cells	RAB31
8.13691e-93	-1.78642	0.088	0.264	1.30508e-88	Epithelial_cells	COL14A1
6.32631e-89	1.55213	0.913	0.886	1.01468e-84	Epithelial_cells	RPS3
2.27706e-87	-1.10865	0.24	0.41	3.65218e-83	Epithelial_cells	AKAP13
8.46105e-87	-1.29846	0.102	0.275	1.35707e-82	Epithelial_cells	PRKG1
4.0664e-86	-1.52894	0.102	0.272	6.5221e-82	Epithelial_cells	CENPP
6.55508e-86	-1.37121	0.246	0.402	1.05137e-81	Epithelial_cells	C1S
1.01872e-83	-1.01796	0.085	0.254	1.63392e-79	Epithelial_cells	CAMK2D
5.35988e-81	-1.14093	0.135	0.307	8.59672e-77	Epithelial_cells	MARCKS
2.97812e-80	1.09179	0.359	0.188	4.77661e-76	Epithelial_cells	THSD4
1.5921e-79	-1.66532	0.102	0.263	2.55358e-75	Epithelial_cells	A2M
1.16355e-74	-1.06077	0.105	0.265	1.86622e-70	Epithelial_cells	MIR100HG
7.24644e-71	-1.00629	0.141	0.3	1.16226e-66	Epithelial_cells	TACC1
6.60498e-69	-1.15447	0.129	0.28	1.05937e-64	Epithelial_cells	PALLD
1.99542e-68	-1.10274	0.119	0.267	3.20046e-64	Epithelial_cells	ANTXR1
9.91971e-64	-1.27407	0.144	0.285	1.59102e-59	Epithelial_cells	RARRES2
3.44716e-63	-1.11295	0.615	0.642	5.5289e-59	Epithelial_cells	EGR1
3.59896e-59	-1.01539	0.134	0.273	5.77237e-55	Epithelial_cells	EPSTI1
4.0213e-53	-1.07476	0.388	0.459	6.44976e-49	Epithelial_cells	SERPING1
2.49631e-40	-1.26401	0.244	0.349	4.00384e-36	Epithelial_cells	CTGF
1.15541e-38	-1.03762	0.275	0.366	1.85316e-34	Epithelial_cells	NNMT
1.17634e-32	-1.02475	0.328	0.392	1.88673e-28	Epithelial_cells	C1R
5.51574e-30	-1.06534	0.241	0.318	8.8467e-26	Epithelial_cells	BTG1
4.3402e-21	-1.12099	0.296	0.34	6.96124e-17	Epithelial_cells	TPM1
2.91701e-08	-1.36608	0.501	0.356	0.00046786	Epithelial_cells	HLA.DRA
0	4.67077	0.502	0.051	0	T_cells	CCL5
0	3.19456	0.62	0.022	0	T_cells	CD2
0	3.17572	0.559	0.025	0	T_cells	TRBC2
0	3.15123	0.506	0.017	0	T_cells	AC245427.1
0	3.08735	0.86	0.139	0	T_cells	PTPRC
0	2.85182	0.417	0.038	0	T_cells	IL7R
0	2.83383	0.574	0.062	0	T_cells	CD96
0	2.78759	0.655	0.093	0	T_cells	FYB1
0	2.72629	0.499	0.013	0	T_cells	CD3D
0	2.72626	0.541	0.074	0	T_cells	CD69
0	2.64168	0.505	0.017	0	T_cells	TRAC
0	2.57373	0.62	0.066	0	T_cells	CD52
0	2.57168	0.314	0.008	0	T_cells	GZMA
0	2.49675	0.424	0.01	0	T_cells	CD3G
0	2.20825	0.393	0.05	0	T_cells	SLFN12L
0	2.10698	0.255	0.008	0	T_cells	NKG7
0	2.09162	0.549	0.125	0	T_cells	ARHGDIB
0	2.07622	0.415	0.064	0	T_cells	IKZF3
0	2.05027	0.322	0.015	0	T_cells	PYHIN1
0	1.93927	0.787	0.214	0	T_cells	SRGN
0	1.92548	0.403	0.044	0	T_cells	IL2RG
0	1.91852	0.332	0.024	0	T_cells	GIMAP7
0	1.82984	0.401	0.047	0	T_cells	UBXN11
0	1.78786	0.264	0.008	0	T_cells	TIGIT
0	1.77887	0.304	0.018	0	T_cells	CD247
0	1.72633	0.309	0.006	0	T_cells	CD3E
0	1.71818	0.347	0.04	0	T_cells	CORO1A
0	1.68613	0.267	0.018	0	T_cells	BCL11B
0	1.46046	0.996	0.832	0	T_cells	TMSB4X
2.5229e-307	1.81578	0.394	0.057	4.04648e-303	T_cells	RAC2
1.36901e-305	2.01188	0.442	0.077	2.19575e-301	T_cells	PCED1B
8.26755e-302	2.04857	0.622	0.152	1.32603e-297	T_cells	RGS1
4.45861e-301	2.46895	0.477	0.101	7.15117e-297	T_cells	IL32
1.05189e-293	1.77324	0.324	0.036	1.68713e-289	T_cells	GIMAP4
8.18641e-280	1.86345	0.382	0.058	1.31302e-275	T_cells	RHOH
1.89513e-278	1.87499	0.495	0.11	3.03959e-274	T_cells	LCP1
1.68161e-275	1.20683	0.995	0.895	2.69713e-271	T_cells	B2M
1.95223e-268	1.83733	0.327	0.042	3.13118e-264	T_cells	ITM2A
9.66794e-267	1.76855	0.333	0.044	1.55064e-262	T_cells	HCST
1.78128e-266	1.53818	0.282	0.029	2.85699e-262	T_cells	PCED1B.AS1
1.18227e-258	1.7422	0.277	0.028	1.89625e-254	T_cells	PTPN22
6.81614e-251	1.69946	0.322	0.044	1.09324e-246	T_cells	GPRIN3
2.49315e-240	1.60913	0.26	0.027	3.99876e-236	T_cells	ITGAL
2.04301e-229	-1.82831	0.085	0.651	3.27679e-225	T_cells	CST3
1.60322e-224	1.8164	0.453	0.117	2.57141e-220	T_cells	ETS1
4.82032e-222	1.85291	0.356	0.064	7.73132e-218	T_cells	SAMSN1
1.55293e-218	2.01359	0.456	0.122	2.49074e-214	T_cells	CLEC2D
2.34737e-215	1.56128	0.359	0.069	3.76495e-211	T_cells	GMFG
8.73637e-213	-2.19708	0.258	0.732	1.40123e-208	T_cells	IFITM3
9.37453e-212	1.49953	0.369	0.073	1.50358e-207	T_cells	CD53
2.23997e-204	1.76656	0.394	0.093	3.59268e-200	T_cells	EMB
1.16027e-199	1.47255	0.274	0.04	1.86095e-195	T_cells	SLA
6.90965e-196	1.57526	0.35	0.071	1.10824e-191	T_cells	ARHGAP15
6.27716e-193	1.42834	0.288	0.046	1.00679e-188	T_cells	LCP2
1.82975e-191	1.64494	0.275	0.044	2.93473e-187	T_cells	GBP5
2.43895e-191	1.84156	0.417	0.113	3.91182e-187	T_cells	SKAP1
4.63876e-187	1.99849	0.447	0.136	7.44011e-183	T_cells	FYN
1.16051e-186	1.73629	0.422	0.119	1.86134e-182	T_cells	EVL
2.68128e-186	1.48685	0.316	0.06	4.3005e-182	T_cells	CYTIP
6.42883e-182	-2.75964	0.091	0.576	1.03112e-177	T_cells	CALD1
3.01112e-180	1.29508	0.849	0.621	4.82953e-176	T_cells	HLA.A
3.09459e-174	1.1958	0.951	0.857	4.96341e-170	T_cells	ACTB
7.50112e-173	1.50026	0.345	0.078	1.2031e-168	T_cells	APBB1IP
1.17275e-168	-2.02346	0.03	0.492	1.88098e-164	T_cells	SERPING1
1.75951e-164	1.65531	0.333	0.079	2.82208e-160	T_cells	ACAP1
3.82334e-163	1.51942	0.291	0.057	6.13226e-159	T_cells	ITGA4
2.29905e-161	2.33351	0.255	0.043	3.68745e-157	T_cells	CCL4
1.21355e-158	1.34767	0.26	0.046	1.94641e-154	T_cells	IKZF1
5.61229e-158	-1.66666	0.195	0.671	9.00155e-154	T_cells	PSAP
1.12674e-157	-2.61001	0.032	0.469	1.80718e-153	T_cells	CYR61
1.75359e-157	1.63337	0.469	0.162	2.81258e-153	T_cells	CXCR4
2.33722e-155	1.64177	0.325	0.08	3.74867e-151	T_cells	JAK3
1.49733e-154	1.72244	0.493	0.193	2.40156e-150	T_cells	45175
1.1971e-150	-2.86834	0.118	0.55	1.92003e-146	T_cells	CLU
2.22637e-150	-1.62523	0.08	0.53	3.57087e-146	T_cells	BEX3
2.01067e-147	1.4046	0.708	0.468	3.22491e-143	T_cells	AL512791.1
7.01166e-146	1.20959	0.819	0.656	1.1246e-141	T_cells	CALM1
7.59965e-140	-1.47834	0.249	0.683	1.21891e-135	T_cells	EGR1
4.66586e-139	1.66087	0.54	0.254	7.48358e-135	T_cells	STK17B
2.01343e-137	-1.38118	0.126	0.57	3.22933e-133	T_cells	RRBP1
2.57624e-135	1.55206	0.321	0.088	4.13203e-131	T_cells	STAT5B
1.16217e-133	-1.82252	0.248	0.623	1.864e-129	T_cells	AC136475.1
1.224e-133	-1.2066	0.193	0.642	1.96317e-129	T_cells	CD63
1.44127e-133	1.81251	0.482	0.211	2.31166e-129	T_cells	CDC42SE2
4.82378e-133	-3.38971	0.093	0.477	7.73687e-129	T_cells	SPARC
9.70641e-132	-2.03519	0.132	0.55	1.55681e-127	T_cells	TIMP1
1.16118e-131	-1.39824	0.123	0.549	1.86242e-127	T_cells	NPC2
2.58649e-129	-2.02829	0.033	0.418	4.14847e-125	T_cells	C1R
2.83145e-128	-1.68295	0.024	0.41	4.54136e-124	T_cells	CNN3
6.94245e-127	-1.15843	0.445	0.81	1.1135e-122	T_cells	HSP90B1
2.15461e-126	1.16327	0.736	0.483	3.45578e-122	T_cells	CCSER1
9.11846e-126	1.14861	0.25	0.054	1.46251e-121	T_cells	ARHGAP30
6.36046e-125	1.44349	0.45	0.177	1.02015e-120	T_cells	CD44
1.02468e-124	1.5486	0.561	0.314	1.64348e-120	T_cells	SH3BGRL3
5.26332e-124	-1.3413	0.097	0.503	8.44184e-120	T_cells	CALU
1.13282e-122	-2.93532	0.076	0.45	1.81694e-118	T_cells	FN1
2.15778e-122	-1.21286	0.121	0.539	3.46086e-118	T_cells	LAPTM4A
6.00764e-122	-1.28717	0.144	0.56	9.63566e-118	T_cells	LMNA
9.51535e-122	1.54868	0.307	0.088	1.52617e-117	T_cells	PRKCH
7.56407e-121	-1.32417	0.019	0.387	1.2132e-116	T_cells	TCEAL9
8.52803e-120	-1.57723	0.065	0.445	1.36781e-115	T_cells	CD9
8.56386e-120	-1.2651	0.227	0.633	1.37356e-115	T_cells	DSTN
1.61982e-118	-1.68712	0.056	0.432	2.59803e-114	T_cells	TSC22D1
3.50758e-118	1.33918	0.339	0.104	5.62581e-114	T_cells	DOCK8
9.19454e-117	-1.83541	0.038	0.4	1.47471e-112	T_cells	C1S
3.14717e-116	-1.44675	0.052	0.427	5.04774e-112	T_cells	APP
9.76823e-116	-1.40537	0.64	0.88	1.56673e-111	T_cells	FTL
1.56047e-113	1.47151	0.526	0.268	2.50284e-109	T_cells	BTG1
8.41717e-113	-1.20358	0.259	0.656	1.35003e-108	T_cells	GSTP1
1.27551e-112	1.46135	0.323	0.099	2.0458e-108	T_cells	RIPOR2
2.53691e-112	-1.92815	0.032	0.38	4.06895e-108	T_cells	NNMT
7.87942e-112	-1.4709	0.03	0.382	1.26378e-107	T_cells	SERPINH1
4.44973e-111	-1.57094	0.167	0.536	7.13693e-107	T_cells	HSPB1
8.85657e-111	-2.35151	0.019	0.359	1.42051e-106	T_cells	CTGF
1.65294e-110	-1.62493	0.064	0.425	2.65114e-106	T_cells	KIAA1217
5.64878e-108	-2.15778	0.024	0.362	9.06008e-104	T_cells	EMP1
1.33802e-106	-1.63322	0.029	0.366	2.14605e-102	T_cells	TIMP2
6.89024e-106	-1.41502	0.036	0.378	1.10513e-101	T_cells	S100A13
1.02301e-104	-1.19122	0.134	0.511	1.64081e-100	T_cells	PTTG1IP
2.8589e-104	-2.1029	0.165	0.502	4.58539e-100	T_cells	IFI27
3.52808e-104	-1.46089	0.051	0.396	5.65869e-100	T_cells	PLXDC2
2.41585e-103	-1.58904	0.021	0.347	3.87478e-99	T_cells	KRT18
2.44751e-103	1.38815	0.638	0.447	3.92556e-99	T_cells	PFN1
6.07736e-103	-1.13075	0.088	0.455	9.74748e-99	T_cells	FNDC3B
6.63359e-103	-1.23334	0.251	0.62	1.06396e-98	T_cells	ANXA2
2.86672e-102	-1.52469	0.056	0.396	4.59793e-98	T_cells	SPINT2
6.7304e-101	1.33428	0.401	0.165	1.07949e-96	T_cells	CELF2
2.67616e-99	1.58633	0.549	0.345	4.2923e-95	T_cells	SARAF
5.9577e-99	-1.27383	0.04	0.369	9.55555e-95	T_cells	YBX3
4.82109e-98	-1.2984	0.047	0.379	7.73254e-94	T_cells	NFIA
5.65127e-98	-1.05691	0.098	0.461	9.06406e-94	T_cells	TCEAL4
6.03307e-98	-1.59135	0.241	0.578	9.67644e-94	T_cells	LGALS1
7.14614e-98	-1.27047	0.037	0.364	1.14617e-93	T_cells	PPFIBP1
1.54519e-97	-1.34245	0.08	0.423	2.47833e-93	T_cells	SOX4
3.61661e-97	-3.32734	0.022	0.328	5.80069e-93	T_cells	MGP
1.52562e-96	-3.35209	0.031	0.338	2.44694e-92	T_cells	C12orf60
2.31772e-95	-1.43311	0.597	0.804	3.71738e-91	T_cells	S100A6
3.22679e-95	-1.43214	0.137	0.479	5.17546e-91	T_cells	ATF3
1.18463e-94	-1.4914	0.066	0.394	1.90002e-90	T_cells	MEIS1
1.19291e-93	-1.02705	0.129	0.489	1.91331e-89	T_cells	APLP2
2.67721e-91	-1.1489	0.028	0.333	4.29397e-87	T_cells	LGALS3BP
1.16082e-90	-1.22089	0.023	0.324	1.86185e-86	T_cells	UACA
1.8605e-90	-1.72482	0.016	0.309	2.98405e-86	T_cells	TM4SF1
2.0084e-90	-1.05483	0.026	0.328	3.22127e-86	T_cells	RAB13
8.14543e-90	-2.57537	0.647	0.405	1.30645e-85	T_cells	IGKC
1.14668e-89	-1.56239	0.012	0.3	1.83915e-85	T_cells	PCOLCE
1.58299e-89	-3.76267	0.127	0.423	2.53896e-85	T_cells	COL3A1
1.61687e-89	-1.50217	0.044	0.348	2.59329e-85	T_cells	CAVIN1
4.67444e-89	1.45909	0.261	0.082	7.49733e-85	T_cells	INPP4B
9.01033e-89	1.2598	0.357	0.143	1.44517e-84	T_cells	SMAP2
1.38007e-88	1.44552	0.273	0.088	2.2135e-84	T_cells	TOX
2.90802e-88	-1.8559	0.019	0.306	4.66417e-84	T_cells	AEBP1
4.52672e-88	-1.1722	0.023	0.318	7.2604e-84	T_cells	MYOF
1.47981e-87	-1.15079	0.03	0.327	2.37347e-83	T_cells	ENAH
4.37486e-87	-1.82334	0.049	0.342	7.01684e-83	T_cells	EPCAM
4.81631e-87	-1.37159	0.05	0.352	7.72488e-83	T_cells	TCF4
7.51151e-87	-1.24906	0.037	0.334	1.20477e-82	T_cells	FGFR1
3.81113e-86	1.52587	0.361	0.16	6.11268e-82	T_cells	LEPROTL1
4.86923e-86	1.43697	0.408	0.183	7.80976e-82	T_cells	TNFAIP3
6.38141e-86	-1.27486	0.231	0.572	1.02351e-81	T_cells	CTSB
2.27461e-85	-1.45378	0.036	0.328	3.64824e-81	T_cells	TNFAIP2
2.75051e-85	1.18263	0.319	0.121	4.41155e-81	T_cells	WIPF1
6.62839e-85	1.38747	0.485	0.277	1.06313e-80	T_cells	SH3KBP1
1.77611e-84	-3.66443	0.218	0.502	2.84869e-80	T_cells	COL1A2
3.73944e-84	-1.39927	0.031	0.319	5.99769e-80	T_cells	TCF7L2
5.68784e-84	1.26744	0.545	0.341	9.12273e-80	T_cells	FNBP1
8.59195e-84	-1.31183	0.012	0.286	1.37806e-79	T_cells	NUPR1
1.46965e-83	-1.63277	0.013	0.286	2.35718e-79	T_cells	BGN
2.03272e-83	-1.92826	0.033	0.314	3.26029e-79	T_cells	COL5A2
1.75701e-82	-1.28066	0.022	0.3	2.81807e-78	T_cells	TPM2
1.94814e-82	-1.13623	0.022	0.301	3.12462e-78	T_cells	NFIB
6.48993e-82	-1.83521	0.115	0.41	1.04092e-77	T_cells	WFDC2
1.36811e-81	1.09675	0.707	0.614	2.19431e-77	T_cells	ARPC2
7.58643e-81	-1.00751	0.025	0.305	1.21679e-76	T_cells	CRIP2
1.01133e-80	-1.39421	0.064	0.362	1.62207e-76	T_cells	TPM1
1.02678e-80	-1.35103	0.039	0.319	1.64685e-76	T_cells	PAX8.AS1
1.26266e-80	-1.15679	0.043	0.331	2.02518e-76	T_cells	PARD3
3.00457e-80	-1.36684	0.032	0.311	4.81903e-76	T_cells	KCNQ1OT1
5.42536e-80	-1.08488	0.014	0.28	8.70173e-76	T_cells	MDK
6.95717e-80	-1.28726	0.039	0.318	1.11586e-75	T_cells	PAX8
8.88067e-80	-3.30298	0.087	0.356	1.42437e-75	T_cells	DCN
1.29041e-79	-1.1995	0.017	0.285	2.06969e-75	T_cells	MYL9
6.73449e-79	-1.46679	0.057	0.341	1.08014e-74	T_cells	MECOM
1.24549e-78	-1.36275	0.023	0.291	1.99765e-74	T_cells	MARCKS
1.73009e-78	-2.06793	0.069	0.352	2.77488e-74	T_cells	C3
1.21572e-77	-1.09051	0.037	0.313	1.9499e-73	T_cells	PBX1
1.49984e-77	-1.0376	0.05	0.334	2.40559e-73	T_cells	CLIC4
3.65118e-77	-1.50745	0.016	0.276	5.85613e-73	T_cells	RARRES2
4.62585e-77	-1.39188	0.022	0.284	7.4194e-73	T_cells	LAMB1
6.80282e-77	-1.03343	0.004	0.255	1.0911e-72	T_cells	DMKN
7.60107e-77	-1.22386	0.026	0.292	1.21914e-72	T_cells	KRT8
8.90607e-76	-1.158	0.013	0.267	1.42844e-71	T_cells	CEBPD
1.37436e-75	-1.99613	0.095	0.369	2.20433e-71	T_cells	C1orf186
1.65751e-75	1.28126	0.359	0.162	2.65847e-71	T_cells	SP140
1.83296e-75	1.27071	0.334	0.145	2.93989e-71	T_cells	STK17A
1.84501e-75	-1.06347	0.056	0.338	2.95921e-71	T_cells	RHOB
2.09299e-75	-1.09677	0.055	0.337	3.35695e-71	T_cells	DLGAP4.AS1
2.1572e-75	1.44677	0.35	0.163	3.45994e-71	T_cells	SLFN5
2.40623e-75	-2.1338	0.023	0.277	3.85936e-71	T_cells	VCAN
7.14967e-75	1.2583	0.272	0.1	1.14674e-70	T_cells	OXNAD1
7.41463e-75	-1.16614	0.013	0.265	1.18923e-70	T_cells	PLOD2
1.02089e-74	-1.02122	0.022	0.281	1.63741e-70	T_cells	LAMC1
1.4682e-74	-1.99491	0.028	0.286	2.35485e-70	T_cells	TIMP3
2.78322e-73	-1.02256	0.052	0.325	4.46401e-69	T_cells	DLD
2.80825e-73	-1.47934	0.02	0.271	4.50415e-69	T_cells	COL6A1
4.67602e-73	-3.3224	0.136	0.398	7.49987e-69	T_cells	COL1A1
9.77931e-73	-1.03396	0.048	0.318	1.5685e-68	T_cells	UBE2E2
1.25346e-72	-1.20944	0.011	0.255	2.01043e-68	T_cells	CFI
1.79021e-72	-1.37484	0.02	0.269	2.87131e-68	T_cells	CFH
3.05702e-72	1.24353	0.309	0.131	4.90315e-68	T_cells	ENO3
3.13605e-72	1.25396	0.602	0.467	5.02991e-68	T_cells	MBNL1
3.8157e-72	1.29341	0.371	0.169	6.12e-68	T_cells	BIRC3
7.58795e-72	-1.01932	0.021	0.27	1.21703e-67	T_cells	SELENOP
2.23416e-71	-1.26772	0.06	0.328	3.58337e-67	T_cells	KLF10
5.61063e-71	-1.87531	0.046	0.304	8.99889e-67	T_cells	SLPI
7.62214e-71	-1.22193	0.039	0.295	1.22251e-66	T_cells	DSP
4.53954e-70	-1.04644	0.012	0.251	7.28097e-66	T_cells	BHLHE41
9.42652e-70	-1.10201	0.086	0.365	1.51192e-65	T_cells	PLCB1
4.20155e-69	-1.00018	0.039	0.293	6.73886e-65	T_cells	GSN
5.24708e-69	-1.24299	0.016	0.254	8.41579e-65	T_cells	ANTXR1
5.90528e-69	1.16861	0.287	0.113	9.47148e-65	T_cells	TNFAIP8
4.27661e-68	-1.06438	0.015	0.252	6.85925e-64	T_cells	IGF2BP2
2.16466e-67	-1.23092	0.042	0.293	3.4719e-63	T_cells	KCNQ1
3.95123e-67	-1.04965	0.019	0.255	6.33738e-63	T_cells	MLF1
6.53425e-67	1.42738	0.458	0.289	1.04803e-62	T_cells	PPP2R5C
8.40238e-66	-1.00827	0.025	0.262	1.34766e-61	T_cells	APBB2
1.18982e-65	1.33034	0.349	0.17	1.90836e-61	T_cells	STK4
2.39185e-65	1.4331	0.25	0.096	3.83629e-61	T_cells	TC2N
3.34487e-65	-1.12194	0.057	0.309	5.36484e-61	T_cells	GNGT1
9.44025e-65	-2.0747	0.083	0.332	1.51412e-60	T_cells	CCDC80
1.57925e-64	1.36354	0.31	0.136	2.53295e-60	T_cells	SERPINB9
3.58945e-64	1.23852	0.461	0.284	5.75712e-60	T_cells	NF1
4.8974e-64	-1.23065	0.409	0.687	7.85494e-60	T_cells	NEAT1
1.6922e-63	-1.01573	0.025	0.256	2.71412e-59	T_cells	AC097103.2
2.12318e-63	-2.50357	0.043	0.273	3.40537e-59	T_cells	SPARCL1
2.4345e-63	1.20672	0.268	0.106	3.90469e-59	T_cells	ISG20
3.42622e-63	-1.74577	0.028	0.253	5.49532e-59	T_cells	COL8A1
6.37974e-63	-1.45774	0.032	0.261	1.02325e-58	T_cells	ELF3
8.65864e-63	1.26915	0.271	0.112	1.38876e-58	T_cells	APOBEC3C
1.30795e-62	-2.59516	0.038	0.26	2.09783e-58	T_cells	LUM
1.42132e-62	-1.60279	0.049	0.285	2.27966e-58	T_cells	AC024230.1
1.67035e-62	-1.89491	0.034	0.26	2.67907e-58	T_cells	IGFBP7
1.81182e-62	1.19431	0.423	0.246	2.90597e-58	T_cells	HLA.F
8.97654e-61	1.18893	0.31	0.138	1.43975e-56	T_cells	DOCK10
2.33957e-60	-1.08296	0.05	0.284	3.75243e-56	T_cells	NAALADL2
2.71817e-60	-1.19251	0.038	0.265	4.35967e-56	T_cells	PALLD
3.69217e-60	1.14327	0.573	0.403	5.92187e-56	T_cells	TXNIP
1.05126e-59	1.40742	0.275	0.118	1.68612e-55	T_cells	ADGRE5
1.30712e-59	-1.01021	0.046	0.279	2.09648e-55	T_cells	SPON1
1.3186e-59	1.47654	0.308	0.144	2.11491e-55	T_cells	LYST
9.73313e-59	-1.81954	0.047	0.266	1.5611e-54	T_cells	COL6A3
2.70235e-58	1.03666	0.459	0.29	4.3343e-54	T_cells	BCAS4
5.00185e-58	-1.00786	0.039	0.263	8.02246e-54	T_cells	SPRY1
2.61062e-55	-1.44886	0.106	0.338	4.18718e-51	T_cells	MT1E
2.32535e-54	1.17373	0.334	0.168	3.72963e-50	T_cells	ANKRD44
6.32605e-54	-1.01446	0.046	0.261	1.01464e-49	T_cells	KAZN
1.13209e-51	-1.1578	0.234	0.495	1.81575e-47	T_cells	SOD2
6.56137e-51	1.11148	0.298	0.147	1.05238e-46	T_cells	FAM107B
3.30971e-50	1.07009	0.292	0.14	5.30844e-46	T_cells	COTL1
6.96657e-50	1.12072	0.256	0.112	1.11737e-45	T_cells	IQGAP2
1.83218e-48	1.0698	0.534	0.417	2.93864e-44	T_cells	SP100
3.9676e-46	1.2771	0.475	0.321	6.36363e-42	T_cells	ID2
1.0617e-45	-1.14186	0.095	0.302	1.70287e-41	T_cells	ESR1
2.19607e-45	1.37109	0.256	0.123	3.52227e-41	T_cells	PARP8
2.00002e-43	1.21482	0.345	0.201	3.20783e-39	T_cells	GBP2
2.12912e-43	1.35981	0.425	0.296	3.4149e-39	T_cells	SYNE2
2.80396e-42	-1.37537	0.08	0.271	4.49727e-38	T_cells	NPAS3
1.96972e-40	1.07753	0.401	0.27	3.15924e-36	T_cells	ELF1
5.03626e-39	1.50617	0.386	0.257	8.07765e-35	T_cells	HMGB2
1.05586e-37	1.04315	0.421	0.293	1.6935e-33	T_cells	KIAA1551
3.31721e-37	-2.90087	0.424	0.272	5.32048e-33	T_cells	IGHG1
4.76136e-37	1.11014	0.483	0.383	7.63675e-33	T_cells	RNF213
1.28113e-35	1.12718	0.264	0.144	2.0548e-31	T_cells	SYNRG
2.2004e-35	1.05238	0.334	0.208	3.52922e-31	T_cells	RARRES3
3.56325e-35	1.10994	0.341	0.219	5.7151e-31	T_cells	ZC3HAV1
1.71278e-27	1.01748	0.453	0.383	2.74713e-23	T_cells	CAPZA1
1.85461e-27	-2.57525	0.297	0.171	2.97461e-23	T_cells	IGHG3
7.76386e-27	-1.33663	0.358	0.523	1.24525e-22	T_cells	MT2A
4.65214e-26	1.02633	0.331	0.231	7.46157e-22	T_cells	SMCHD1
3.70624e-25	1.0131	0.273	0.173	5.94444e-21	T_cells	CYTOR
7.49292e-22	1.09483	0.288	0.2	1.20179e-17	T_cells	CBLB
1.01117e-15	-2.59157	0.258	0.171	1.62182e-11	T_cells	IGHG4
4.27055e-14	1.13212	0.339	0.293	6.84953e-10	T_cells	RBPJ
3.08876e-13	1.08414	0.349	0.311	4.95406e-09	T_cells	RNF19A
3.32768e-12	1.18061	0.488	0.485	5.33727e-08	T_cells	HIST1H4C
7.24482e-11	-1.1028	0.726	0.813	1.162e-06	T_cells	RPL8
0	3.94262	0.978	0.346	0	Monocyte	HLA.DRA
0	3.77373	0.978	0.307	0	Monocyte	HLA.DRB1
0	3.76878	0.838	0.032	0	Monocyte	TYROBP
0	3.67161	0.915	0.23	0	Monocyte	HLA.DPA1
0	3.59635	0.916	0.232	0	Monocyte	HLA.DPB1
0	3.3225	0.507	0.006	0	Monocyte	OLR1
0	3.26898	0.499	0.014	0	Monocyte	C1QB
0	3.23722	0.715	0.027	0	Monocyte	AIF1
0	3.16863	0.952	0.221	0	Monocyte	SRGN
0	3.11566	0.792	0.104	0	Monocyte	HLA.DQA1
0	3.11261	0.456	0.013	0	Monocyte	C1QA
0	3.03832	0.697	0.093	0	Monocyte	CD83
0	2.88979	0.542	0.046	0	Monocyte	HLA.DQA2
0	2.88904	0.5	0.005	0	Monocyte	LYZ
0	2.88148	0.698	0.093	0	Monocyte	HLA.DQB1
0	2.8689	0.651	0.025	0	Monocyte	FCER1G
0	2.83605	0.559	0.035	0	Monocyte	GPR183
0	2.78887	0.55	0.008	0	Monocyte	MS4A6A
0	2.78665	0.804	0.178	0	Monocyte	HLA.DRB5
0	2.74998	0.54	0.009	0	Monocyte	MNDA
0	2.72863	0.842	0.151	0	Monocyte	RGS1
0	2.70842	0.982	0.534	0	Monocyte	CD74
0	2.62141	0.649	0.138	0	Monocyte	SGK1
0	2.50511	0.731	0.149	0	Monocyte	CTSS
0	2.48751	0.433	0.017	0	Monocyte	C15orf48
0	2.45976	0.414	0.008	0	Monocyte	FCGR3A
0	2.44735	0.521	0.026	0	Monocyte	PLEK
0	2.44379	0.332	0.015	0	Monocyte	CCL3L3
0	2.42573	0.713	0.097	0	Monocyte	LAPTM5
0	2.4144	0.269	0.009	0	Monocyte	IL1B
0	2.37371	0.418	0.013	0	Monocyte	CD14
0	2.33094	0.43	0.021	0	Monocyte	BCL2A1
0	2.28514	0.356	0.007	0	Monocyte	CD163
0	2.28463	0.342	0.021	0	Monocyte	AC243829.4
0	2.28062	0.415	0.047	0	Monocyte	MSR1
0	2.24958	0.362	0.015	0	Monocyte	AC025580.1
0	2.22022	0.474	0.019	0	Monocyte	CYBB
0	2.21728	0.354	0.006	0	Monocyte	C1QC
0	2.13748	0.409	0.011	0	Monocyte	FCGR2A
0	2.1065	0.431	0.007	0	Monocyte	CD86
0	2.08028	0.41	0.005	0	Monocyte	CLEC7A
0	2.08021	0.358	0.004	0	Monocyte	TMEM52B
0	2.07996	0.449	0.056	0	Monocyte	SLC8A1
0	2.05272	0.333	0.011	0	Monocyte	AL590385.2
0	1.99273	0.423	0.044	0	Monocyte	FGL2
0	1.96889	0.46	0.013	0	Monocyte	LST1
0	1.96464	0.436	0.038	0	Monocyte	AOAH
0	1.957	0.41	0.017	0	Monocyte	ITGAX
0	1.94998	0.53	0.075	0	Monocyte	HLA.DMB
0	1.94448	0.325	0.011	0	Monocyte	IGSF6
0	1.94309	0.483	0.06	0	Monocyte	TNFSF13B
0	1.93288	0.356	0.006	0	Monocyte	MS4A7
0	1.8748	0.493	0.051	0	Monocyte	ITGB2
0	1.85752	0.375	0.032	0	Monocyte	EPB41L3
0	1.84188	0.401	0.025	0	Monocyte	C1orf162
0	1.82115	0.638	0.115	0	Monocyte	FYB1
0	1.78381	0.373	0.029	0	Monocyte	KYNU
0	1.6687	0.273	0.012	0	Monocyte	ADGRE2
0	1.65532	0.328	0.011	0	Monocyte	TFEC
0	1.59474	0.346	0.02	0	Monocyte	LAIR1
0	1.56051	0.296	0.003	0	Monocyte	FPR1
0	1.53065	0.346	0.026	0	Monocyte	HCK
0	1.51826	0.283	0.004	0	Monocyte	LILRB4
0	1.41982	0.281	0.016	0	Monocyte	RNASE6
8.57157e-308	2.65806	0.594	0.123	1.37479e-303	Monocyte	PLAUR
1.0387e-297	1.78201	0.363	0.036	1.66597e-293	Monocyte	HLA.DQB2
2.23639e-290	2.0826	0.303	0.023	3.58694e-286	Monocyte	SLC16A10
1.4178e-287	1.40734	0.324	0.027	2.27401e-283	Monocyte	CD84
1.51594e-287	1.32449	0.274	0.017	2.43142e-283	Monocyte	LILRB1
1.27021e-286	2.14923	0.58	0.123	2.03729e-282	Monocyte	TYMP
1.84814e-285	2.31788	0.704	0.185	2.96423e-281	Monocyte	RGS2
1.06402e-283	1.58514	0.272	0.017	1.70657e-279	Monocyte	IRF8
3.18751e-279	1.97062	0.621	0.149	5.11245e-275	Monocyte	HLA.DMA
7.96852e-277	1.74075	0.338	0.033	1.27807e-272	Monocyte	GK
1.32105e-269	3.02802	0.399	0.055	2.11883e-265	Monocyte	APOC1
3.38787e-268	2.06907	0.291	0.023	5.43381e-264	Monocyte	CCL4L2
3.54268e-265	1.83853	0.321	0.031	5.68211e-261	Monocyte	C5AR1
7.74108e-262	1.699	0.322	0.033	1.24159e-257	Monocyte	IL18
4.10063e-258	2.24893	0.927	0.579	6.57699e-254	Monocyte	SAT1
7.56495e-250	1.38918	0.268	0.021	1.21334e-245	Monocyte	FAM26F
2.15803e-248	1.8605	0.538	0.114	3.46126e-244	Monocyte	LYN
9.00021e-242	4.4957	0.35	0.046	1.44354e-237	Monocyte	SPP1
7.45087e-239	1.55724	0.436	0.069	1.19504e-234	Monocyte	SAMSN1
1.33808e-236	1.86954	0.556	0.126	2.14615e-232	Monocyte	PDE4B
4.10622e-234	1.69742	0.358	0.046	6.58597e-230	Monocyte	ALOX5AP
2.04221e-232	1.21179	0.71	0.178	3.2755e-228	Monocyte	PTPRC
9.51264e-217	1.95683	0.552	0.14	1.52573e-212	Monocyte	ZEB2
4.48054e-214	1.34903	0.997	0.898	7.18634e-210	Monocyte	B2M
1.24819e-212	1.86174	0.563	0.153	2.00197e-208	Monocyte	CTSH
3.34065e-212	1.15257	0.298	0.033	5.35807e-208	Monocyte	NCKAP1L
4.63459e-210	2.10468	0.474	0.106	7.43342e-206	Monocyte	DOCK4
6.08877e-210	1.39543	0.325	0.043	9.76579e-206	Monocyte	ALOX5
3.29135e-208	2.17743	0.97	0.844	5.27899e-204	Monocyte	FTL
3.07805e-207	2.08242	0.778	0.391	4.93688e-203	Monocyte	GPX1
1.77476e-206	1.13984	0.257	0.025	2.84653e-202	Monocyte	CD4
1.59797e-203	1.692	0.36	0.059	2.56298e-199	Monocyte	ACSL1
5.93817e-202	1.40178	0.379	0.062	9.52423e-198	Monocyte	TNFRSF1B
7.16096e-200	1.50391	0.986	0.839	1.14855e-195	Monocyte	TMSB4X
1.24263e-199	1.92886	0.628	0.211	1.99306e-195	Monocyte	SAMHD1
1.505e-197	1.71372	0.482	0.112	2.41387e-193	Monocyte	RAPGEF1
1.14721e-196	1.20039	0.289	0.035	1.84001e-192	Monocyte	HAVCR2
1.23013e-196	1.4129	0.343	0.05	1.97301e-192	Monocyte	LCP2
1.30968e-194	1.57614	0.427	0.085	2.1006e-190	Monocyte	TGFBI
2.83612e-187	1.86799	0.319	0.046	4.54885e-183	Monocyte	CCL4
1.01771e-184	1.7364	0.302	0.043	1.63231e-180	Monocyte	HBEGF
2.32204e-183	1.47347	0.507	0.123	3.72432e-179	Monocyte	LCP1
5.61836e-181	2.35594	0.278	0.037	9.01129e-177	Monocyte	CXCL8
1.62497e-180	2.32553	0.604	0.216	2.60629e-176	Monocyte	UBAC2
1.77089e-178	1.6495	0.493	0.129	2.84032e-174	Monocyte	COTL1
2.65526e-178	1.26893	0.375	0.068	4.25877e-174	Monocyte	HCLS1
1.15422e-175	1.32647	0.268	0.035	1.85126e-171	Monocyte	TBXAS1
7.71569e-166	2.19887	0.849	0.599	1.23752e-161	Monocyte	PSAP
2.10977e-165	1.15287	0.255	0.032	3.38387e-161	Monocyte	PTGER4
5.50387e-164	1.15418	0.326	0.054	8.82766e-160	Monocyte	GPRIN3
3.02789e-163	1.37815	0.308	0.053	4.85643e-159	Monocyte	CXCL16
9.97995e-162	1.1046	0.272	0.038	1.60068e-157	Monocyte	IL10RA
5.6434e-161	1.10754	0.265	0.037	9.05145e-157	Monocyte	SH2B3
5.403e-160	1.2097	0.975	0.81	8.66587e-156	Monocyte	HLA.B
4.6304e-159	1.76281	0.457	0.125	7.42669e-155	Monocyte	RILPL2
7.21583e-157	1.95878	0.493	0.144	1.15735e-152	Monocyte	ZNF331
2.78988e-155	1.247	0.285	0.046	4.47469e-151	Monocyte	CIITA
1.26985e-151	1.27128	0.273	0.043	2.03672e-147	Monocyte	CTSZ
1.21135e-150	1.66497	0.41	0.104	1.94288e-146	Monocyte	TLDC2
1.1962e-148	1.75709	0.598	0.235	1.91858e-144	Monocyte	LITAF
3.64418e-148	2.00397	0.8	0.511	5.8449e-144	Monocyte	CTSB
4.22258e-145	1.06498	0.432	0.117	6.77259e-141	Monocyte	44986
1.77241e-142	1.48445	0.364	0.085	2.84278e-138	Monocyte	PTPRE
1.01542e-141	1.59988	0.766	0.479	1.62864e-137	Monocyte	NPC2
1.83181e-141	2.07973	0.539	0.211	2.93804e-137	Monocyte	GLUL
6.97217e-140	1.57821	0.533	0.181	1.11827e-135	Monocyte	CD44
2.5509e-139	1.1189	0.978	0.92	4.09138e-135	Monocyte	TMSB10
1.52562e-137	1.30056	0.418	0.106	2.44694e-133	Monocyte	DOCK8
2.59987e-137	1.37184	0.89	0.626	4.16994e-133	Monocyte	HLA.A
2.76642e-135	1.89458	0.522	0.193	4.43706e-131	Monocyte	RBM47
4.92824e-134	1.3673	0.858	0.565	7.9044e-130	Monocyte	CST3
7.8966e-134	1.09093	0.319	0.063	1.26654e-129	Monocyte	INPP5D
5.73526e-133	1.31048	0.508	0.164	9.19878e-129	Monocyte	CELF2
6.61212e-130	1.84783	0.662	0.325	1.06052e-125	Monocyte	NAMPT
1.94423e-129	1.24367	0.317	0.068	3.11835e-125	Monocyte	GNA13
1.83259e-128	1.37638	0.362	0.092	2.93929e-124	Monocyte	MANBA
2.91748e-127	1.77171	0.469	0.157	4.67935e-123	Monocyte	NFKB1
3.32298e-127	1.15118	0.266	0.049	5.32972e-123	Monocyte	CSF1R
1.11817e-126	1.57189	0.398	0.113	1.79343e-122	Monocyte	RASSF4
6.68632e-126	1.63625	0.531	0.216	1.07242e-121	Monocyte	GRN
2.37523e-125	1.41282	0.379	0.102	3.80963e-121	Monocyte	PFKFB3
4.71362e-125	1.39275	0.505	0.17	7.56018e-121	Monocyte	CXCR4
1.11476e-124	1.50157	0.616	0.285	1.78796e-120	Monocyte	CCDC88A
2.12354e-124	-3.31561	0.076	0.537	3.40594e-120	Monocyte	CLU
3.49661e-124	1.10936	0.283	0.055	5.60821e-120	Monocyte	MCTP1
1.40214e-123	1.07342	0.292	0.059	2.24889e-119	Monocyte	ADAM28
9.13153e-121	1.37138	0.394	0.114	1.46461e-116	Monocyte	AP1S2
5.67657e-118	1.7485	0.757	0.465	9.10465e-114	Monocyte	NFKBIA
3.88109e-116	1.03692	0.289	0.059	6.22489e-112	Monocyte	HCST
5.28911e-115	-2.64316	0.112	0.556	8.48321e-111	Monocyte	CALD1
1.09849e-113	1.01769	0.262	0.051	1.76186e-109	Monocyte	ST8SIA4
1.21919e-113	1.20464	0.495	0.169	1.95545e-109	Monocyte	MEF2C
6.90134e-113	-1.86263	0.072	0.513	1.10691e-108	Monocyte	BEX3
1.28826e-112	1.49352	0.504	0.204	2.06624e-108	Monocyte	LAP3
2.69812e-110	1.54229	0.617	0.315	4.32751e-106	Monocyte	HIF1A
6.35354e-110	2.36286	0.262	0.055	1.01904e-105	Monocyte	AREG
1.331e-109	1.15592	0.278	0.061	2.13479e-105	Monocyte	LY96
2.37336e-109	1.82095	0.419	0.143	3.80663e-105	Monocyte	RIPK2
2.76556e-109	1.11916	0.346	0.088	4.43567e-105	Monocyte	APBB1IP
1.74497e-108	1.46611	0.593	0.273	2.79875e-104	Monocyte	BTG1
2.59865e-108	1.62004	0.355	0.103	4.16798e-104	Monocyte	CPVL
5.0259e-108	1.36706	0.619	0.314	8.06104e-104	Monocyte	GRB2
2.46032e-107	1.03832	0.256	0.051	3.94611e-103	Monocyte	MYO1F
3.71331e-107	2.07546	0.359	0.106	5.95577e-103	Monocyte	APOE
4.67671e-107	1.05764	0.275	0.06	7.50098e-103	Monocyte	ADA2
2.53239e-105	-2.56669	0.034	0.452	4.06171e-101	Monocyte	CYR61
1.2136e-104	1.44164	0.598	0.299	1.94649e-100	Monocyte	RNF149
3.2465e-104	1.5965	0.389	0.122	5.20705e-100	Monocyte	NR4A3
7.30995e-102	1.25637	0.369	0.112	1.17244e-97	Monocyte	ARHGAP18
1.05929e-101	1.44622	0.486	0.185	1.699e-97	Monocyte	TNFAIP3
1.18975e-101	1.31347	0.325	0.091	1.90825e-97	Monocyte	CAPG
4.10142e-100	1.38959	0.488	0.203	6.57828e-96	Monocyte	VAMP8
6.55827e-98	1.16475	0.426	0.145	1.05188e-93	Monocyte	SMAP2
1.00272e-97	1.67346	0.392	0.139	1.60826e-93	Monocyte	LGMN
1.22317e-97	1.53296	0.608	0.302	1.96184e-93	Monocyte	NR4A2
3.12328e-97	-1.094	0.839	0.929	5.00943e-93	Monocyte	RPL35A
4.145e-96	1.39863	0.477	0.198	6.64816e-92	Monocyte	ETV6
7.05735e-94	1.43283	0.274	0.07	1.13193e-89	Monocyte	NR1H2
1.59663e-93	1.30161	0.332	0.099	2.56083e-89	Monocyte	MAFB
1.07265e-92	1.23441	0.477	0.201	1.72043e-88	Monocyte	GNAI2
7.96524e-92	1.36568	0.561	0.28	1.27755e-87	Monocyte	TAOK3
3.72565e-91	1.05027	0.407	0.136	5.97556e-87	Monocyte	DOCK10
7.97883e-91	1.26199	0.379	0.129	1.27972e-86	Monocyte	BASP1
3.41242e-90	-1.20069	0.645	0.885	5.47319e-86	Monocyte	MT.ND4L
5.5155e-90	1.08564	0.26	0.064	8.84631e-86	Monocyte	THEMIS2
2.08269e-89	1.2947	0.377	0.13	3.34042e-85	Monocyte	DPYD
4.24726e-89	-2.01657	0.029	0.404	6.81219e-85	Monocyte	C1R
6.39236e-89	1.51523	0.795	0.599	1.02527e-84	Monocyte	FTH1
2.05128e-87	1.31697	0.333	0.105	3.29005e-83	Monocyte	TTC33
4.04233e-85	1.03437	0.945	0.861	6.4835e-81	Monocyte	ACTB
8.82059e-85	-1.96954	0.029	0.388	1.41473e-80	Monocyte	C1S
9.27353e-85	1.43907	0.419	0.164	1.48738e-80	Monocyte	KLF4
1.28798e-84	1.30213	0.5	0.228	2.06579e-80	Monocyte	REL
1.51543e-84	1.59787	0.405	0.16	2.4306e-80	Monocyte	FMNL2
4.39011e-84	1.0829	0.266	0.071	7.0413e-80	Monocyte	EFHD2
9.47336e-84	1.28003	0.386	0.136	1.51943e-79	Monocyte	SERPINB9
4.82748e-83	1.35709	0.458	0.198	7.74279e-79	Monocyte	RNASET2
5.63356e-83	1.19488	0.38	0.136	9.03566e-79	Monocyte	SKAP2
2.16765e-82	1.33849	0.454	0.193	3.47669e-78	Monocyte	ARL4C
6.00233e-82	-1.61541	0.035	0.394	9.62714e-78	Monocyte	CNN3
6.30306e-82	-1.00646	0.845	0.931	1.01095e-77	Monocyte	RPS18
2.16467e-81	1.1306	0.367	0.128	3.47191e-77	Monocyte	CHST11
5.72289e-81	-1.75122	0.054	0.412	9.17894e-77	Monocyte	KIAA1217
9.28336e-81	1.15785	0.691	0.469	1.48896e-76	Monocyte	OAZ1
1.7806e-80	1.32083	0.426	0.174	2.85591e-76	Monocyte	MAP3K8
2.06109e-80	1.09768	0.386	0.144	3.30579e-76	Monocyte	SYK
6.24399e-80	-3.27781	0.125	0.46	1.00147e-75	Monocyte	SPARC
1.04179e-79	1.4642	0.379	0.145	1.67092e-75	Monocyte	MXD1
2.84538e-79	1.18283	0.467	0.21	4.5637e-75	Monocyte	RGS10
4.85422e-79	1.33553	0.452	0.206	7.78569e-75	Monocyte	RNF130
2.01927e-78	1.34939	0.407	0.167	3.2387e-74	Monocyte	CTSC
9.93945e-77	1.18169	0.525	0.268	1.59419e-72	Monocyte	RASGEF1B
6.86006e-76	1.23612	0.473	0.223	1.10028e-71	Monocyte	AC012358.3
1.13605e-75	1.24289	0.358	0.129	1.82211e-71	Monocyte	LDLRAD4
4.48272e-75	-1.69487	0.043	0.384	7.18983e-71	Monocyte	MEIS1
5.96767e-75	1.06681	0.49	0.222	9.57154e-71	Monocyte	RAB31
7.19962e-75	1.62527	0.538	0.302	1.15475e-70	Monocyte	ATP1B3
8.60514e-75	-3.99831	0.175	0.495	1.38018e-70	Monocyte	COL1A2
1.05866e-74	1.32463	0.539	0.288	1.69798e-70	Monocyte	QKI
2.47222e-74	1.12861	0.264	0.076	3.9652e-70	Monocyte	VAMP5
3.10714e-74	1.29448	0.477	0.227	4.98354e-70	Monocyte	HIF1A.AS2
9.58256e-74	-1.88736	0.038	0.367	1.53695e-69	Monocyte	NNMT
1.46992e-73	1.1703	0.262	0.077	2.35761e-69	Monocyte	DMXL2
2.31382e-73	1.38138	0.582	0.339	3.71113e-69	Monocyte	PLXDC2
4.38738e-73	1.47016	0.488	0.242	7.03691e-69	Monocyte	MARCKS
6.91192e-73	1.03416	0.298	0.095	1.1086e-68	Monocyte	CD58
1.12276e-71	1.33578	0.581	0.317	1.80079e-67	Monocyte	ID2
1.44024e-71	-1.42712	0.04	0.368	2.31e-67	Monocyte	SERPINH1
1.99584e-71	1.1692	0.501	0.251	3.20113e-67	Monocyte	FAM49B
5.22446e-71	1.45554	0.418	0.186	8.37952e-67	Monocyte	SIPA1L1
2.34827e-70	-1.41352	0.04	0.365	3.7664e-66	Monocyte	S100A13
2.75371e-70	-2.16131	0.084	0.402	4.41668e-66	Monocyte	WFDC2
3.83389e-70	-1.1389	0.27	0.614	6.14918e-66	Monocyte	DSTN
3.95003e-69	-2.20297	0.031	0.345	6.33545e-65	Monocyte	CTGF
5.34047e-69	1.0998	0.597	0.344	8.56557e-65	Monocyte	AKAP13
8.35569e-69	-1.42386	0.269	0.588	1.34017e-64	Monocyte	GAS5
3.20601e-68	1.1786	0.367	0.151	5.14213e-64	Monocyte	MFSD1
4.399e-67	-1.52329	0.026	0.334	7.05556e-63	Monocyte	KRT18
8.44223e-67	-1.22179	0.146	0.484	1.35405e-62	Monocyte	CALU
8.47596e-67	1.21452	0.352	0.141	1.35946e-62	Monocyte	KCTD12
2.73598e-66	1.32748	0.461	0.224	4.38824e-62	Monocyte	CREM
1.67921e-65	-1.91332	0.031	0.332	2.69328e-61	Monocyte	EPCAM
3.21179e-64	-3.87093	0.121	0.413	5.1514e-60	Monocyte	COL3A1
4.08245e-64	-3.32766	0.034	0.326	6.54785e-60	Monocyte	C12orf60
7.2583e-64	-1.5632	0.038	0.337	1.16416e-59	Monocyte	CAVIN1
9.75915e-64	-1.29102	0.046	0.351	1.56527e-59	Monocyte	PPFIBP1
9.54587e-63	-3.60729	0.098	0.392	1.53106e-58	Monocyte	COL1A1
3.38933e-62	-1.11409	0.023	0.315	5.43615e-58	Monocyte	SELENOM
7.28794e-62	-3.24012	0.031	0.316	1.16891e-57	Monocyte	MGP
1.66962e-61	-1.57696	0.01	0.29	2.67791e-57	Monocyte	PCOLCE
1.05639e-60	-1.10963	0.026	0.316	1.69435e-56	Monocyte	ENAH
1.18703e-60	1.03811	0.389	0.176	1.90387e-56	Monocyte	SYNGR2
1.87337e-60	1.01356	0.672	0.446	3.00471e-56	Monocyte	LRRFIP1
1.15005e-59	-1.65704	0.059	0.351	1.84456e-55	Monocyte	TPM1
7.98705e-59	-1.99159	0.029	0.303	1.28104e-54	Monocyte	COL5A2
9.45507e-59	-1.81332	0.021	0.296	1.5165e-54	Monocyte	AEBP1
1.01844e-58	-1.07372	0.099	0.407	1.63348e-54	Monocyte	C12orf57
2.48354e-58	-1.11543	0.02	0.295	3.98335e-54	Monocyte	CRIP2
2.50655e-58	-3.33917	0.073	0.347	4.02026e-54	Monocyte	DCN
3.02328e-58	1.17243	0.443	0.218	4.84903e-54	Monocyte	EPSTI1
1.14457e-57	-1.19237	0.02	0.291	1.83577e-53	Monocyte	NFIB
1.48362e-57	-1.24278	0.072	0.365	2.37957e-53	Monocyte	NFIA
3.08821e-57	-1.65686	0.026	0.297	4.95318e-53	Monocyte	TM4SF1
4.44786e-57	1.19125	0.504	0.289	7.13393e-53	Monocyte	MEF2A
4.55289e-57	1.26923	0.448	0.227	7.30238e-53	Monocyte	ADAMTSL4.AS1
1.85566e-56	-1.17608	0.03	0.303	2.97629e-52	Monocyte	PBX1
2.22906e-56	1.1783	0.332	0.141	3.57519e-52	Monocyte	YWHAH
3.16432e-56	-1.17626	0.042	0.322	5.07526e-52	Monocyte	FGFR1
5.75437e-56	-1.20888	0.043	0.32	9.22943e-52	Monocyte	PARD3
2.94259e-55	-2.27871	0.054	0.325	4.71962e-51	Monocyte	CCDC80
1.63075e-54	-1.14474	0.03	0.297	2.61556e-50	Monocyte	MYH10
5.09651e-54	-1.47991	0.056	0.33	8.17428e-50	Monocyte	MECOM
6.14628e-54	-1.55641	0.013	0.267	9.85802e-50	Monocyte	RARRES2
9.09119e-54	-1.30435	0.042	0.307	1.45814e-49	Monocyte	PAX8
1.15574e-53	-1.55427	0.02	0.275	1.85368e-49	Monocyte	BGN
2.22202e-53	1.06062	0.388	0.185	3.56389e-49	Monocyte	MYO9B
2.79493e-53	-1.23539	0.057	0.331	4.48278e-49	Monocyte	SYNE2
9.73815e-53	-1.01481	0.133	0.434	1.5619e-48	Monocyte	OPTN
1.17404e-52	-1.19536	0.021	0.275	1.88304e-48	Monocyte	MYL9
1.4253e-52	1.67703	0.415	0.214	2.28604e-48	Monocyte	PLIN2
4.46802e-52	-1.20312	0.026	0.282	7.16625e-48	Monocyte	KRT8
4.86534e-52	-1.05391	0.02	0.272	7.80351e-48	Monocyte	LAMC1
5.51196e-52	-1.29284	0.04	0.301	8.84063e-48	Monocyte	GNGT1
1.6971e-51	2.09508	0.452	0.273	2.72198e-47	Monocyte	CTSD
1.74842e-51	-1.95945	0.039	0.295	2.80428e-47	Monocyte	SLPI
4.54602e-51	1.26087	0.313	0.13	7.29136e-47	Monocyte	TEX14
6.41289e-51	-1.00099	0.046	0.311	1.02856e-46	Monocyte	CDC42BPA
6.41017e-50	-1.01545	0.023	0.269	1.02813e-45	Monocyte	MDK
8.59549e-50	-1.21321	0.016	0.257	1.37863e-45	Monocyte	SPRY1
9.9071e-50	-1.30021	0.054	0.307	1.589e-45	Monocyte	PAX8.AS1
1.30773e-49	-1.12876	0.035	0.288	2.09747e-45	Monocyte	TPM2
1.74922e-49	-1.23689	0.037	0.286	2.80557e-45	Monocyte	DSP
5.25567e-48	-1.04068	0.038	0.284	8.42957e-44	Monocyte	WWTR1
5.31417e-48	1.04434	0.346	0.159	8.5234e-44	Monocyte	ALCAM
6.21017e-48	-1.31602	0.033	0.273	9.96048e-44	Monocyte	LAMB1
6.21766e-47	-1.45593	0.027	0.261	9.9725e-43	Monocyte	COL6A1
1.39038e-46	-1.3807	0.027	0.259	2.23004e-42	Monocyte	CFH
1.59038e-46	-1.68502	0.04	0.277	2.5508e-42	Monocyte	AC024230.1
1.95405e-46	1.08026	0.437	0.247	3.1341e-42	Monocyte	PTPN1
2.02148e-46	1.10429	0.627	0.452	3.24226e-42	Monocyte	SOD2
2.12508e-46	-1.15518	0.034	0.271	3.40841e-42	Monocyte	SPON1
1.27853e-45	1.29694	0.27	0.11	2.05064e-41	Monocyte	INSIG1
1.93631e-45	-1.06178	0.025	0.254	3.10565e-41	Monocyte	PLOD2
2.16891e-45	-1.04629	0.078	0.332	3.47871e-41	Monocyte	PRKCI
5.17396e-45	-1.03645	0.085	0.337	8.29851e-41	Monocyte	PTPRG
5.37008e-45	-1.01852	0.037	0.272	8.61307e-41	Monocyte	LAPTM4B
1.00448e-44	-1.21471	0.057	0.299	1.61109e-40	Monocyte	KCNQ1OT1
1.25159e-44	-1.0723	0.077	0.325	2.00742e-40	Monocyte	DLGAP4.AS1
3.28082e-44	1.76044	0.423	0.259	5.26211e-40	Monocyte	CTSL
4.37031e-44	-1.01229	0.039	0.271	7.00955e-40	Monocyte	ABLIM1
5.38888e-44	-1.10376	0.124	0.382	8.64323e-40	Monocyte	IFITM1
1.00133e-43	-1.5863	0.099	0.343	1.60604e-39	Monocyte	EMP1
1.07622e-43	-1.89872	0.047	0.275	1.72615e-39	Monocyte	TIMP3
2.428e-43	-1.46758	0.031	0.252	3.89427e-39	Monocyte	ELF3
7.32441e-43	-1.08369	0.103	0.353	1.17476e-38	Monocyte	PLCB1
9.49765e-43	-1.09925	0.06	0.293	1.52333e-38	Monocyte	PATJ
3.12225e-42	-1.3961	0.111	0.358	5.00777e-38	Monocyte	C1orf186
2.25493e-41	-2.4622	0.04	0.252	3.61668e-37	Monocyte	LUM
9.92202e-40	-1.84528	0.048	0.258	1.59139e-35	Monocyte	COL6A3
1.69466e-39	1.02321	0.295	0.138	2.71806e-35	Monocyte	TMEM176B
2.93012e-39	-1.08928	0.09	0.32	4.69963e-35	Monocyte	BICD1
1.07472e-38	-1.80956	0.044	0.251	1.72374e-34	Monocyte	IGFBP7
1.38106e-37	1.09493	0.406	0.247	2.21508e-33	Monocyte	ASAH1
2.73436e-37	-2.31101	0.06	0.263	4.38564e-33	Monocyte	SPARCL1
1.94868e-36	-1.05291	0.05	0.253	3.12549e-32	Monocyte	KAZN
6.16211e-36	1.04266	0.433	0.268	9.88341e-32	Monocyte	ATP2B1
7.40478e-36	-1.31266	0.11	0.329	1.18765e-31	Monocyte	MT1E
2.73427e-35	-1.08235	0.05	0.25	4.38549e-31	Monocyte	THSD4
3.00192e-35	-1.00894	0.068	0.274	4.81477e-31	Monocyte	NAALADL2
1.47863e-34	1.02072	0.292	0.143	2.37158e-30	Monocyte	ETS2
2.31054e-34	-1.23721	0.089	0.295	3.70588e-30	Monocyte	ESR1
3.06757e-34	-1.12558	0.107	0.313	4.92008e-30	Monocyte	LIMA1
3.24059e-34	1.02678	0.338	0.183	5.19758e-30	Monocyte	ARHGAP26
1.00073e-32	1.27517	0.307	0.162	1.60508e-28	Monocyte	CARMIL1
1.36513e-32	-1.06892	0.095	0.303	2.18954e-28	Monocyte	TCF7L2
2.30762e-31	1.02128	0.319	0.177	3.7012e-27	Monocyte	METTL9
1.61766e-27	-1.00952	0.837	0.898	2.59457e-23	Monocyte	RPS3
2.19623e-26	-1.28815	0.09	0.263	3.52254e-22	Monocyte	NPAS3
4.35229e-26	1.02062	0.411	0.271	6.98063e-22	Monocyte	LINC.PINT
1.12916e-25	1.04869	0.377	0.252	1.81106e-21	Monocyte	SDHD
1.03408e-24	-2.64331	0.594	0.419	1.65855e-20	Monocyte	IGKC
8.33318e-24	1.22582	0.371	0.242	1.33656e-19	Monocyte	FCHSD2
1.99181e-23	1.04085	0.261	0.145	3.19466e-19	Monocyte	TFRC
4.9808e-19	1.16406	0.286	0.178	7.9887e-15	Monocyte	GPNMB
1.59897e-17	-1.23869	0.127	0.259	2.56458e-13	Monocyte	VCAN
3.11767e-11	-1.15746	0.749	0.807	5.00044e-07	Monocyte	RPL8
0	3.05243	0.863	0.255	0	Neuroepithelial_cell	TCF7L2
0	2.93585	0.68	0.042	0	Neuroepithelial_cell	RMST
0	2.84095	0.656	0.029	0	Neuroepithelial_cell	BEX1
0	2.4675	0.654	0.089	0	Neuroepithelial_cell	FGFR2
0	2.43574	0.584	0.034	0	Neuroepithelial_cell	CPNE4
0	2.37506	0.566	0.063	0	Neuroepithelial_cell	IL1RAPL2
0	2.23058	0.582	0.08	0	Neuroepithelial_cell	DACH1
0	1.97638	0.465	0.033	0	Neuroepithelial_cell	XKR4
0	1.93415	0.451	0.04	0	Neuroepithelial_cell	EPHA6
0	1.59091	0.375	0.024	0	Neuroepithelial_cell	FGF13
0	1.36598	0.309	0.009	0	Neuroepithelial_cell	LRP4.AS1
3.97394e-307	1.21886	0.285	0.012	6.37381e-303	Neuroepithelial_cell	TMEM132B
3.50461e-278	2.27749	0.783	0.191	5.62105e-274	Neuroepithelial_cell	MIR100HG
3.75769e-276	1.31731	0.303	0.018	6.02696e-272	Neuroepithelial_cell	AC069120.1
1.21478e-272	2.69511	0.824	0.227	1.94838e-268	Neuroepithelial_cell	AC024230.1
1.65665e-272	2.18324	0.547	0.079	2.65709e-268	Neuroepithelial_cell	DAPL1
3.61764e-266	1.6869	0.414	0.042	5.80233e-262	Neuroepithelial_cell	GALNT17
5.56381e-263	1.56474	0.422	0.044	8.92379e-259	Neuroepithelial_cell	CCDC170
9.3e-255	1.34089	0.355	0.03	1.49163e-250	Neuroepithelial_cell	AC112206.2
4.63592e-241	1.24631	0.379	0.037	7.43556e-237	Neuroepithelial_cell	CRTAC1
5.54207e-238	1.63625	0.463	0.06	8.88892e-234	Neuroepithelial_cell	TCEAL2
7.31635e-238	1.55021	0.383	0.04	1.17347e-233	Neuroepithelial_cell	PART1
8.9772e-238	1.68101	0.439	0.055	1.43985e-233	Neuroepithelial_cell	ADGRL3
2.92077e-233	1.66268	0.445	0.059	4.68463e-229	Neuroepithelial_cell	ANXA3
8.17702e-233	1.63827	0.445	0.057	1.31151e-228	Neuroepithelial_cell	EYA4
4.15597e-232	1.45415	0.375	0.039	6.66576e-228	Neuroepithelial_cell	LINC01301
1.29387e-226	2.07452	0.68	0.166	2.07524e-222	Neuroepithelial_cell	MSLN
4.90514e-217	1.18812	0.295	0.024	7.86735e-213	Neuroepithelial_cell	CASC1
8.61841e-217	2.05497	0.584	0.117	1.38231e-212	Neuroepithelial_cell	COPG2
1.73215e-209	1.68739	0.479	0.077	2.7782e-205	Neuroepithelial_cell	PLEKHG4B
1.43819e-201	1.99261	0.637	0.157	2.30672e-197	Neuroepithelial_cell	CHD7
2.21306e-198	1.6584	0.477	0.08	3.54953e-194	Neuroepithelial_cell	LINC01572
5.95625e-194	1.30753	0.418	0.059	9.55323e-190	Neuroepithelial_cell	LMO3
3.91256e-191	1.97904	0.623	0.159	6.27536e-187	Neuroepithelial_cell	WT1
3.80432e-186	1.05053	0.301	0.03	6.10175e-182	Neuroepithelial_cell	HOXD.AS2
5.66078e-185	1.95589	0.658	0.186	9.07933e-181	Neuroepithelial_cell	GABPB1.AS1
1.53295e-184	1.45015	0.375	0.051	2.4587e-180	Neuroepithelial_cell	WT1.AS
3.60243e-181	1.40663	0.297	0.031	5.77794e-177	Neuroepithelial_cell	DGKG
4.33236e-181	1.72753	0.49	0.095	6.94866e-177	Neuroepithelial_cell	PODXL
2.25682e-178	1.67787	0.469	0.087	3.61972e-174	Neuroepithelial_cell	ADGRA3
6.05592e-176	1.61342	0.486	0.096	9.71309e-172	Neuroepithelial_cell	CDH1
3.53933e-172	1.75344	0.535	0.122	5.67674e-168	Neuroepithelial_cell	WDR11
2.74648e-171	1.83815	0.547	0.131	4.40509e-167	Neuroepithelial_cell	PCGF3
9.79601e-164	1.65696	0.547	0.13	1.57118e-159	Neuroepithelial_cell	SRGAP3
1.79325e-163	-2.78556	0.367	0.847	2.87619e-159	Neuroepithelial_cell	HLA.B
4.73802e-161	1.71546	0.699	0.225	7.59931e-157	Neuroepithelial_cell	NPAS3
5.95106e-161	1.36999	0.396	0.066	9.54491e-157	Neuroepithelial_cell	TMEM161B.AS1
7.14517e-160	1.76907	0.529	0.125	1.14601e-155	Neuroepithelial_cell	DANT2
1.65882e-159	1.86655	0.727	0.254	2.66059e-155	Neuroepithelial_cell	ESR1
4.06024e-159	1.17482	0.299	0.037	6.51222e-155	Neuroepithelial_cell	AC106869.1
6.27268e-156	1.09511	0.283	0.033	1.00607e-151	Neuroepithelial_cell	AC009061.2
3.83173e-155	1.98015	0.709	0.252	6.14572e-151	Neuroepithelial_cell	PDE4D
2.51799e-154	1.71207	0.623	0.191	4.0386e-150	Neuroepithelial_cell	YAP1
6.80674e-153	1.15956	0.367	0.057	1.09173e-148	Neuroepithelial_cell	APOA1
2.87656e-150	1.05802	0.295	0.037	4.61371e-146	Neuroepithelial_cell	RIC3
2.16348e-149	1.34609	0.383	0.065	3.47001e-145	Neuroepithelial_cell	AC006206.2
6.03353e-147	1.65741	0.646	0.207	9.67718e-143	Neuroepithelial_cell	AC097103.2
1.71747e-146	1.18835	0.33	0.048	2.75464e-142	Neuroepithelial_cell	CEMIP
2.84468e-146	1.21939	0.359	0.058	4.56258e-142	Neuroepithelial_cell	PALMD
6.56401e-145	-2.5	0.725	0.916	1.0528e-140	Neuroepithelial_cell	B2M
8.65596e-145	1.65198	0.529	0.137	1.38833e-140	Neuroepithelial_cell	ATP6V1H
2.12968e-140	1.2525	0.324	0.05	3.41579e-136	Neuroepithelial_cell	MAP3K21
4.30789e-135	1.6859	0.529	0.146	6.90943e-131	Neuroepithelial_cell	BEX2
5.00863e-135	1.86467	0.783	0.399	8.03335e-131	Neuroepithelial_cell	FTX
5.46852e-135	1.90619	0.664	0.243	8.77095e-131	Neuroepithelial_cell	KCNQ1
2.8479e-134	1.77601	0.59	0.189	4.56775e-130	Neuroepithelial_cell	PTPN14
3.7384e-134	1.52695	0.518	0.134	5.99602e-130	Neuroepithelial_cell	MAML3
3.11901e-133	-1.89352	0.705	0.937	5.00257e-129	Neuroepithelial_cell	MT.CO3
3.79111e-133	1.18901	0.285	0.04	6.08057e-129	Neuroepithelial_cell	LINC01285
8.44621e-133	1.29324	0.418	0.087	1.35469e-128	Neuroepithelial_cell	ADGRL2
3.71089e-132	1.49191	0.432	0.096	5.95189e-128	Neuroepithelial_cell	DPH6
1.46839e-131	1.65681	0.971	0.891	2.35516e-127	Neuroepithelial_cell	HSP90AA1
6.75869e-129	1.34998	0.41	0.088	1.08403e-124	Neuroepithelial_cell	WWC1
1.11527e-128	1.63928	0.699	0.296	1.78878e-124	Neuroepithelial_cell	PCMTD1
5.5865e-128	-1.6978	0.799	0.962	8.96018e-124	Neuroepithelial_cell	MT.CO2
4.81832e-127	1.6105	0.518	0.142	7.7281e-123	Neuroepithelial_cell	MAGI1
4.90184e-127	1.3521	0.494	0.13	7.86206e-123	Neuroepithelial_cell	IGF1R
5.651e-127	1.78623	0.688	0.279	9.06364e-123	Neuroepithelial_cell	AUTS2
1.00211e-125	1.53094	0.566	0.177	1.60728e-121	Neuroepithelial_cell	EMX2
3.21004e-125	-2.51591	0.135	0.674	5.14859e-121	Neuroepithelial_cell	HLA.C
2.07807e-124	1.23623	0.387	0.079	3.33302e-120	Neuroepithelial_cell	AMN1
3.91757e-124	1.18832	0.336	0.059	6.28339e-120	Neuroepithelial_cell	AC098829.1
2.66983e-120	1.19204	0.389	0.083	4.28214e-116	Neuroepithelial_cell	STON2
7.3154e-120	1.59881	0.52	0.148	1.17332e-115	Neuroepithelial_cell	GPC6
3.82016e-119	1.04657	0.293	0.047	6.12715e-115	Neuroepithelial_cell	NR6A1
3.35189e-115	1.10037	0.332	0.062	5.37609e-111	Neuroepithelial_cell	AL359915.2
3.87356e-115	1.1548	0.406	0.091	6.21281e-111	Neuroepithelial_cell	RFX3.AS1
4.33425e-115	1.51684	0.566	0.188	6.95171e-111	Neuroepithelial_cell	RBP1
1.11876e-114	1.27981	0.326	0.061	1.79439e-110	Neuroepithelial_cell	MIR3936HG
2.01122e-114	1.51859	0.705	0.326	3.2258e-110	Neuroepithelial_cell	SOX6
2.70392e-114	1.2127	0.379	0.082	4.33682e-110	Neuroepithelial_cell	BMP7
3.96027e-113	1.20649	0.334	0.064	6.35188e-109	Neuroepithelial_cell	STOX2
4.13497e-113	1.5054	0.584	0.205	6.63207e-109	Neuroepithelial_cell	IGF2BP2
1.00701e-112	1.50842	0.697	0.31	1.61514e-108	Neuroepithelial_cell	RERE
2.20246e-112	1.42633	0.463	0.121	3.53253e-108	Neuroepithelial_cell	CHODL
4.71002e-112	1.0128	0.289	0.048	7.5544e-108	Neuroepithelial_cell	CDH3
5.05683e-109	1.13879	0.342	0.069	8.11065e-105	Neuroepithelial_cell	AL022068.1
2.8552e-108	1.16453	0.383	0.087	4.57946e-104	Neuroepithelial_cell	LRIG1
3.25649e-107	1.69934	0.639	0.26	5.22308e-103	Neuroepithelial_cell	KCNQ1OT1
6.57008e-107	1.11917	0.352	0.074	1.05378e-102	Neuroepithelial_cell	LEMD1
9.23157e-107	1.47402	0.639	0.263	1.48065e-102	Neuroepithelial_cell	PBX1
9.66487e-107	1.00873	0.279	0.047	1.55015e-102	Neuroepithelial_cell	SLC25A29
2.32596e-106	-1.40151	0.73	0.936	3.73061e-102	Neuroepithelial_cell	MT.ATP6
2.37794e-105	-1.32561	0.725	0.926	3.81398e-101	Neuroepithelial_cell	PABPC1
4.9677e-103	1.28436	0.436	0.118	7.96769e-99	Neuroepithelial_cell	AC139887.2
1.55272e-102	1.56325	0.697	0.338	2.49041e-98	Neuroepithelial_cell	SPIDR
4.94221e-102	1.21545	0.357	0.081	7.92682e-98	Neuroepithelial_cell	UBXN2B
1.31631e-101	1.0749	0.34	0.072	2.11123e-97	Neuroepithelial_cell	DCDC2
5.02219e-101	-2.01203	0.211	0.678	8.0551e-97	Neuroepithelial_cell	HLA.E
6.59331e-101	1.43715	0.643	0.261	1.0575e-96	Neuroepithelial_cell	GNGT1
6.86764e-101	1.15214	0.354	0.079	1.1015e-96	Neuroepithelial_cell	TSC2
8.4695e-101	1.10543	0.354	0.077	1.35842e-96	Neuroepithelial_cell	HMGA2
2.42007e-100	-3.45751	0.096	0.594	3.88155e-96	Neuroepithelial_cell	CD74
8.0998e-99	-1.22004	0.816	0.945	1.29913e-94	Neuroepithelial_cell	RPS8
9.11098e-98	1.04414	0.322	0.068	1.46131e-93	Neuroepithelial_cell	NECTIN3
6.77318e-97	1.08729	0.322	0.068	1.08635e-92	Neuroepithelial_cell	ANKS1B
1.10959e-96	1.32794	0.609	0.243	1.77968e-92	Neuroepithelial_cell	KRT8
1.31138e-95	1.31896	0.443	0.126	2.10332e-91	Neuroepithelial_cell	TNNT1
2.95785e-95	1.38084	0.486	0.16	4.74409e-91	Neuroepithelial_cell	FBXO21
1.00526e-94	1.09903	0.352	0.083	1.61234e-90	Neuroepithelial_cell	AR
5.92732e-94	1.1401	0.684	0.288	9.50683e-90	Neuroepithelial_cell	MECOM
1.17403e-93	1.26422	0.443	0.131	1.88303e-89	Neuroepithelial_cell	C11orf49
1.77457e-93	1.22301	0.334	0.076	2.84624e-89	Neuroepithelial_cell	ZSCAN31
2.55484e-93	1.40061	0.688	0.343	4.09771e-89	Neuroepithelial_cell	RB1CC1
3.60344e-93	1.0916	0.332	0.074	5.77955e-89	Neuroepithelial_cell	AP001347.1
1.23775e-92	1.13076	0.773	0.355	1.98522e-88	Neuroepithelial_cell	WFDC2
1.94958e-92	1.57383	0.521	0.186	3.12692e-88	Neuroepithelial_cell	RORA
2.67648e-92	1.07504	0.314	0.068	4.29281e-88	Neuroepithelial_cell	STK33
7.04157e-92	1.29336	0.473	0.15	1.1294e-87	Neuroepithelial_cell	GPHN
1.49161e-91	1.20855	0.426	0.118	2.39239e-87	Neuroepithelial_cell	SPINK5
2.13391e-91	1.25058	0.469	0.151	3.42258e-87	Neuroepithelial_cell	BCAM
5.72908e-91	1.24215	0.646	0.268	9.18886e-87	Neuroepithelial_cell	PAX8.AS1
1.80138e-90	1.28952	0.338	0.08	2.88923e-86	Neuroepithelial_cell	RNLS
8.43721e-90	1.20652	0.402	0.113	1.35324e-85	Neuroepithelial_cell	PPP1R9A
1.84881e-89	-1.16018	0.881	0.979	2.9653e-85	Neuroepithelial_cell	MT.CO1
4.27637e-88	1.36153	0.721	0.366	6.85887e-84	Neuroepithelial_cell	KIAA1217
5.81669e-88	1.06259	0.334	0.078	9.32938e-84	Neuroepithelial_cell	COL4A5
2.96822e-86	1.18959	0.291	0.062	4.76072e-82	Neuroepithelial_cell	AC007906.2
4.9717e-86	1.25509	0.404	0.116	7.97411e-82	Neuroepithelial_cell	FANCC
1.55696e-85	1.30955	0.631	0.286	2.49721e-81	Neuroepithelial_cell	ITM2C
1.77208e-85	-2.81919	0.117	0.564	2.84223e-81	Neuroepithelial_cell	LGALS1
2.55546e-83	1.23359	0.416	0.127	4.09871e-79	Neuroepithelial_cell	LINC00624
4.23028e-83	1.2249	0.621	0.256	6.78495e-79	Neuroepithelial_cell	CCND2
2.63816e-82	-1.45324	0.391	0.747	4.23135e-78	Neuroepithelial_cell	EIF1
4.65996e-82	1.08793	0.324	0.08	7.47411e-78	Neuroepithelial_cell	PLXNB1
5.68608e-82	-1.44606	0.656	0.892	9.1199e-78	Neuroepithelial_cell	MT.ND3
9.06534e-82	1.32941	0.762	0.495	1.45399e-77	Neuroepithelial_cell	RAB2A
5.62657e-81	1.24962	0.51	0.192	9.02446e-77	Neuroepithelial_cell	CCDC18.AS1
7.97718e-81	1.34159	0.615	0.283	1.27946e-76	Neuroepithelial_cell	FGFR1
5.65243e-80	1.30525	0.639	0.302	9.06593e-76	Neuroepithelial_cell	MAML2
6.27877e-80	-1.57062	0.697	0.906	1.00705e-75	Neuroepithelial_cell	MT.RNR1
6.31601e-80	1.17977	0.457	0.152	1.01302e-75	Neuroepithelial_cell	RAD51B
8.56586e-80	-2.42465	0.234	0.627	1.37388e-75	Neuroepithelial_cell	SAT1
9.89846e-80	-1.86301	0.166	0.58	1.58761e-75	Neuroepithelial_cell	JUNB
3.00465e-79	1.20083	0.949	0.923	4.81916e-75	Neuroepithelial_cell	RPS20
6.40582e-79	-1.89671	0.287	0.666	1.02743e-74	Neuroepithelial_cell	HLA.A
8.33286e-79	1.02421	0.318	0.079	1.33651e-74	Neuroepithelial_cell	FAM174B
8.37376e-79	1.0712	0.418	0.127	1.34307e-74	Neuroepithelial_cell	IQCA1
1.00874e-78	1.11522	0.408	0.123	1.61791e-74	Neuroepithelial_cell	HIST1H2BG
1.9494e-78	1.33074	0.57	0.241	3.12664e-74	Neuroepithelial_cell	NAALADL2
1.04421e-77	-2.14752	0.723	0.857	1.67481e-73	Neuroepithelial_cell	TMSB4X
1.59735e-77	1.20067	0.426	0.136	2.56199e-73	Neuroepithelial_cell	FGD4
2.09597e-77	1.4058	0.537	0.224	3.36172e-73	Neuroepithelial_cell	TJP1
2.15812e-77	1.2129	0.613	0.268	3.46141e-73	Neuroepithelial_cell	PAX8
3.54261e-77	1.34799	0.619	0.303	5.68199e-73	Neuroepithelial_cell	SNHG14
1.32503e-76	-1.17355	0.59	0.854	2.12522e-72	Neuroepithelial_cell	RPS15
1.57732e-74	1.10176	0.377	0.112	2.52986e-70	Neuroepithelial_cell	SLC19A1
2.07841e-74	1.28743	0.746	0.465	3.33356e-70	Neuroepithelial_cell	BEX3
2.72865e-74	1.28415	0.545	0.23	4.37648e-70	Neuroepithelial_cell	C9orf3
3.74451e-74	-1.12642	0.799	0.947	6.00582e-70	Neuroepithelial_cell	MT.ND5
8.63118e-74	-3.08318	0.07	0.486	1.38435e-69	Neuroepithelial_cell	IFI27
1.75073e-72	-1.09759	0.795	0.928	2.80799e-68	Neuroepithelial_cell	RPS19
2.4122e-72	1.01683	0.396	0.126	3.86892e-68	Neuroepithelial_cell	SLC25A26
3.6642e-72	-1.65841	0.691	0.862	5.87702e-68	Neuroepithelial_cell	FTL
3.98238e-72	1.2134	0.43	0.146	6.38734e-68	Neuroepithelial_cell	ZNF608
7.24657e-72	1.08005	0.412	0.135	1.16228e-67	Neuroepithelial_cell	ID4
2.7456e-71	1.01835	0.355	0.103	4.40366e-67	Neuroepithelial_cell	COL18A1
3.58184e-71	1.09833	0.414	0.135	5.74491e-67	Neuroepithelial_cell	FOLR1
4.88521e-71	1.34212	0.521	0.223	7.83539e-67	Neuroepithelial_cell	IMMP2L
3.50076e-70	1.06171	0.375	0.115	5.61487e-66	Neuroepithelial_cell	RIMKLB
5.32616e-70	1.21027	0.496	0.197	8.54263e-66	Neuroepithelial_cell	SCAPER
2.11805e-69	1.01679	0.434	0.148	3.39713e-65	Neuroepithelial_cell	SYK
3.96168e-69	1.04989	0.295	0.074	6.35414e-65	Neuroepithelial_cell	RNASE1
6.26078e-69	-1.36583	0.592	0.835	1.00417e-64	Neuroepithelial_cell	MT.ND6
7.3331e-69	-1.1382	0.697	0.862	1.17616e-64	Neuroepithelial_cell	RPL3
1.25727e-68	1.31899	0.545	0.237	2.01654e-64	Neuroepithelial_cell	ABLIM1
2.17031e-68	1.27614	0.557	0.254	3.48096e-64	Neuroepithelial_cell	PRKDC
2.5082e-68	1.23132	0.586	0.283	4.02291e-64	Neuroepithelial_cell	PARD3
2.92517e-68	1.1177	0.822	0.642	4.69169e-64	Neuroepithelial_cell	RBM25
4.49064e-68	-1.9587	0.443	0.715	7.20254e-64	Neuroepithelial_cell	VIM
5.46469e-68	1.00634	0.408	0.139	8.76481e-64	Neuroepithelial_cell	EMX2OS
6.67428e-68	1.10128	0.48	0.189	1.07049e-63	Neuroepithelial_cell	CTBP2
1.33978e-67	1.00224	0.34	0.098	2.14887e-63	Neuroepithelial_cell	DYNC2H1
5.25124e-67	1.23869	0.633	0.326	8.42247e-63	Neuroepithelial_cell	NFIA
9.52065e-67	1.1162	0.473	0.183	1.52702e-62	Neuroepithelial_cell	SBF2
1.32091e-66	-1.04294	0.783	0.924	2.11861e-62	Neuroepithelial_cell	MT.CYB
1.45866e-66	1.00312	0.352	0.107	2.33955e-62	Neuroepithelial_cell	DENND1A
2.15609e-66	1.00458	0.295	0.078	3.45815e-62	Neuroepithelial_cell	TMEM68
4.44728e-66	1.0131	0.666	0.34	7.13299e-62	Neuroepithelial_cell	MEIS1
2.30418e-65	1.2273	0.561	0.26	3.69568e-61	Neuroepithelial_cell	ITFG1
1.03335e-64	-1.6334	0.16	0.54	1.65739e-60	Neuroepithelial_cell	RRBP1
1.70803e-64	1.04287	0.305	0.084	2.73952e-60	Neuroepithelial_cell	LGR4
6.80512e-64	-1.46255	0.695	0.877	1.09147e-59	Neuroepithelial_cell	ACTB
3.02058e-63	1.17543	0.508	0.221	4.84471e-59	Neuroepithelial_cell	BCAT1
7.2968e-63	1.01411	0.42	0.151	1.17033e-58	Neuroepithelial_cell	FUT8
2.77246e-62	1.07777	0.361	0.114	4.44675e-58	Neuroepithelial_cell	LINC01876
2.78426e-62	-5.47124	0.066	0.453	4.46567e-58	Neuroepithelial_cell	IGKC
3.74875e-61	-3.2028	0.043	0.414	6.01262e-57	Neuroepithelial_cell	HLA.DRA
6.43271e-61	1.08916	0.477	0.196	1.03174e-56	Neuroepithelial_cell	EPB41L4A
7.39404e-61	1.25545	0.521	0.242	1.18593e-56	Neuroepithelial_cell	TCEA1
1.17339e-60	1.07084	0.4	0.144	1.88199e-56	Neuroepithelial_cell	ZNF518A
1.87731e-58	1.10577	0.428	0.17	3.01102e-54	Neuroepithelial_cell	BEX4
2.06474e-58	1.15787	0.51	0.233	3.31164e-54	Neuroepithelial_cell	TEAD1
2.19657e-58	1.07656	0.613	0.326	3.52307e-54	Neuroepithelial_cell	ATP2B4
2.8338e-58	1.07625	0.459	0.187	4.54512e-54	Neuroepithelial_cell	PIP5K1A
1.48434e-56	1.0392	0.352	0.118	2.38073e-52	Neuroepithelial_cell	EFCAB13
1.83603e-56	-1.59118	0.221	0.549	2.9448e-52	Neuroepithelial_cell	IFI16
1.99092e-56	-1.26616	0.361	0.661	3.19323e-52	Neuroepithelial_cell	YBX1
2.53347e-56	-2.8259	0.029	0.377	4.06343e-52	Neuroepithelial_cell	HLA.DRB1
2.80196e-56	1.07135	0.568	0.285	4.49407e-52	Neuroepithelial_cell	REV3L
3.53329e-56	-1.06255	0.523	0.769	5.66704e-52	Neuroepithelial_cell	RPS5
2.22342e-55	1.01676	0.338	0.113	3.56615e-51	Neuroepithelial_cell	EPB41L5
4.17728e-55	-1.83143	0.018	0.361	6.69993e-51	Neuroepithelial_cell	BST2
5.32849e-55	-1.38243	0.289	0.602	8.54637e-51	Neuroepithelial_cell	HOOK2
1.01442e-53	1.13909	0.434	0.182	1.62704e-49	Neuroepithelial_cell	XPR1
1.16742e-53	1.1182	0.404	0.157	1.87243e-49	Neuroepithelial_cell	HIST1H2BD
2.94049e-53	1.05535	0.57	0.293	4.71625e-49	Neuroepithelial_cell	KIAA1551
4.05739e-53	-1.15482	0.471	0.74	6.50765e-49	Neuroepithelial_cell	MT.ATP8
3.5162e-52	-2.61365	0.211	0.521	5.63963e-48	Neuroepithelial_cell	MT2A
1.66576e-51	-1.92449	0.027	0.358	2.67171e-47	Neuroepithelial_cell	NNMT
1.97255e-51	1.18525	0.674	0.421	3.16377e-47	Neuroepithelial_cell	UBE2D2
1.71585e-50	-1.73829	0.291	0.578	2.75206e-46	Neuroepithelial_cell	IFI6
1.76555e-50	-1.61456	0.051	0.379	2.83177e-46	Neuroepithelial_cell	IFITM1
2.22412e-50	1.00538	0.4	0.159	3.56726e-46	Neuroepithelial_cell	EPB41L4A.AS1
2.28033e-50	1.04052	0.354	0.127	3.65742e-46	Neuroepithelial_cell	WDR59
3.79681e-50	-1.97303	0.072	0.391	6.08971e-46	Neuroepithelial_cell	C1R
1.34966e-49	-1.4922	0.641	0.788	2.16472e-45	Neuroepithelial_cell	S100A6
1.71222e-49	1.07692	0.633	0.371	2.74623e-45	Neuroepithelial_cell	CHD9
1.94788e-49	1.0496	0.416	0.175	3.1242e-45	Neuroepithelial_cell	AFDN
2.98271e-49	1.0198	0.486	0.227	4.78397e-45	Neuroepithelial_cell	WWOX
8.19679e-49	-1.12431	0.418	0.699	1.31468e-44	Neuroepithelial_cell	DDX5
9.48675e-48	1.07688	0.588	0.334	1.52158e-43	Neuroepithelial_cell	BAZ2B
9.68935e-47	1.05197	0.549	0.301	1.55408e-42	Neuroepithelial_cell	POGZ
3.42877e-46	1.04525	0.602	0.357	5.4994e-42	Neuroepithelial_cell	UBE2H
4.41305e-46	1.06518	0.402	0.168	7.07809e-42	Neuroepithelial_cell	GMDS.AS1
2.16601e-43	-1.81677	0.139	0.438	3.47406e-39	Neuroepithelial_cell	TXNIP
5.65365e-42	-1.21995	0.055	0.344	9.06789e-38	Neuroepithelial_cell	TSPO
6.83386e-42	-1.68521	0.02	0.301	1.09608e-37	Neuroepithelial_cell	TNFSF10
5.62037e-41	-1.7379	0.383	0.599	9.01451e-37	Neuroepithelial_cell	CST3
9.26839e-41	-1.11444	0.197	0.494	1.48656e-36	Neuroepithelial_cell	IQGAP1
1.00069e-40	-1.26457	0.141	0.427	1.60501e-36	Neuroepithelial_cell	RBM3
5.12986e-40	-1.48646	0.334	0.572	8.22779e-36	Neuroepithelial_cell	S100A10
8.21855e-40	-1.13785	0.033	0.306	1.31817e-35	Neuroepithelial_cell	SELENOM
1.55596e-39	-2.2324	0.029	0.299	2.49561e-35	Neuroepithelial_cell	HLA.DPB1
1.93617e-39	-1.89472	0.262	0.516	3.10543e-35	Neuroepithelial_cell	TIMP1
2.12982e-39	-2.22648	0.025	0.298	3.41602e-35	Neuroepithelial_cell	HLA.DPA1
7.87227e-39	-1.24265	0.131	0.417	1.26263e-34	Neuroepithelial_cell	LDHA
9.93688e-39	-1.27121	0.018	0.28	1.59378e-34	Neuroepithelial_cell	HLA.F
1.05067e-38	-1.63372	0.051	0.326	1.68517e-34	Neuroepithelial_cell	MT1E
3.53178e-38	-1.0937	0.346	0.592	5.66462e-34	Neuroepithelial_cell	ZFP36
1.5175e-37	-1.39192	0.094	0.366	2.43391e-33	Neuroepithelial_cell	TSC22D3
2.57138e-37	-1.30336	0.412	0.643	4.12423e-33	Neuroepithelial_cell	DUSP1
6.01062e-37	-1.25321	0.123	0.395	9.64043e-33	Neuroepithelial_cell	DBI
1.07073e-36	-2.54451	0.037	0.291	1.71734e-32	Neuroepithelial_cell	SRGN
1.9796e-36	-1.10598	0.482	0.681	3.17509e-32	Neuroepithelial_cell	COX6C
2.12844e-36	-1.33824	0.146	0.412	3.41381e-32	Neuroepithelial_cell	STAT1
6.53221e-36	-1.76365	0.211	0.452	1.0477e-31	Neuroepithelial_cell	S100A4
1.73371e-35	-1.37657	0.178	0.446	2.78069e-31	Neuroepithelial_cell	ANXA1
5.39558e-35	-1.36038	0.045	0.299	8.65397e-31	Neuroepithelial_cell	STK17B
5.54407e-35	-1.05056	0.379	0.599	8.89213e-31	Neuroepithelial_cell	DSTN
2.99865e-34	-1.13267	0.254	0.499	4.80954e-30	Neuroepithelial_cell	OAZ1
8.53309e-34	-1.66316	0.146	0.398	1.36862e-29	Neuroepithelial_cell	ISG15
5.83116e-33	-1.01724	0.156	0.412	9.35259e-29	Neuroepithelial_cell	TRAM1
1.82864e-32	-1.2042	0.121	0.371	2.93296e-28	Neuroepithelial_cell	BHLHE40
1.89596e-32	-1.10484	0.336	0.558	3.04093e-28	Neuroepithelial_cell	IER2
3.29562e-32	-1.51439	0.652	0.811	5.28585e-28	Neuroepithelial_cell	RPL8
8.02398e-32	-1.56491	0.139	0.372	1.28697e-27	Neuroepithelial_cell	C1S
1.07373e-31	-2.07681	0.094	0.333	1.72215e-27	Neuroepithelial_cell	C3
3.01809e-31	-1.06686	0.246	0.491	4.84072e-27	Neuroepithelial_cell	ITGB1
6.949e-31	-1.22732	0.041	0.267	1.11455e-26	Neuroepithelial_cell	SOCS3
1.88737e-30	-1.0786	0.1	0.337	3.02716e-26	Neuroepithelial_cell	JAK1
6.92474e-30	-3.02232	0.084	0.305	1.11066e-25	Neuroepithelial_cell	MGP
7.88724e-30	-3.05804	0.117	0.337	1.26503e-25	Neuroepithelial_cell	DCN
9.68533e-30	-1.55739	0.135	0.363	1.55343e-25	Neuroepithelial_cell	NAMPT
2.00949e-29	-1.03388	0.545	0.719	3.22302e-25	Neuroepithelial_cell	KLF6
5.23651e-29	-1.3154	0.084	0.31	8.39883e-25	Neuroepithelial_cell	KLF10
5.41707e-29	-1.02209	0.148	0.377	8.68844e-25	Neuroepithelial_cell	UQCR11
1.42448e-28	-1.21585	0.268	0.48	2.28472e-24	Neuroepithelial_cell	PFN1
1.68662e-28	-1.00325	0.111	0.344	2.70516e-24	Neuroepithelial_cell	ARL6IP5
1.69729e-27	-1.35726	0.197	0.416	2.72229e-23	Neuroepithelial_cell	GADD45B
2.61221e-27	-1.69634	0.125	0.337	4.18973e-23	Neuroepithelial_cell	NR4A2
5.06175e-27	-1.32689	0.055	0.266	8.11854e-23	Neuroepithelial_cell	BGN
4.96721e-26	-3.01465	0.115	0.314	7.9669e-22	Neuroepithelial_cell	C12orf60
8.04758e-26	-1.08757	0.111	0.323	1.29075e-21	Neuroepithelial_cell	EIF4A3
1.02954e-25	1.12473	0.35	0.173	1.65128e-21	Neuroepithelial_cell	TMCC1
2.39798e-25	-2.33155	0.229	0.418	3.84612e-21	Neuroepithelial_cell	FN1
2.21296e-24	-1.69644	0.062	0.259	3.54936e-20	Neuroepithelial_cell	VCAN
2.95731e-23	-4.67727	0.098	0.299	4.74324e-19	Neuroepithelial_cell	IGHG1
1.94012e-22	-1.17665	0.066	0.251	3.11176e-18	Neuroepithelial_cell	CFH
2.30254e-22	-1.21563	0.092	0.278	3.69304e-18	Neuroepithelial_cell	PCOLCE
7.76261e-22	-1.55866	0.131	0.315	1.24504e-17	Neuroepithelial_cell	SLC2A3
9.84996e-22	-1.04516	0.074	0.254	1.57984e-17	Neuroepithelial_cell	IRF1
3.9341e-21	-1.05268	0.436	0.594	6.3099e-17	Neuroepithelial_cell	AC022217.3
4.72983e-21	-1.05406	0.146	0.332	7.58617e-17	Neuroepithelial_cell	CD55
9.68583e-21	-1.38234	0.318	0.474	1.55351e-16	Neuroepithelial_cell	SOD2
2.58552e-20	-1.08362	0.086	0.262	4.14692e-16	Neuroepithelial_cell	MX1
2.70373e-20	-1.63353	0.121	0.291	4.33651e-16	Neuroepithelial_cell	COL5A2
5.5793e-20	-1.02675	0.584	0.664	8.94865e-16	Neuroepithelial_cell	BX470102.1
3.18217e-19	-1.61203	0.084	0.25	5.10388e-15	Neuroepithelial_cell	COL6A3
3.31674e-19	-1.43909	0.117	0.283	5.31972e-15	Neuroepithelial_cell	AEBP1
6.75542e-19	-2.04553	0.15	0.312	1.0835e-14	Neuroepithelial_cell	CCDC80
1.02929e-18	-1.11463	0.139	0.306	1.65087e-14	Neuroepithelial_cell	LIMA1
2.81353e-18	-1.19148	0.123	0.29	4.51262e-14	Neuroepithelial_cell	LY6E
3.25419e-17	-2.16599	0.104	0.255	5.21939e-13	Neuroepithelial_cell	SPARCL1
7.95592e-17	-2.93388	0.377	0.475	1.27605e-12	Neuroepithelial_cell	COL1A2
3.41635e-15	-1.41614	0.191	0.331	5.47948e-11	Neuroepithelial_cell	EMP1
8.53547e-15	-2.73382	0.256	0.375	1.369e-10	Neuroepithelial_cell	COL1A1
1.05668e-13	-1.04425	0.17	0.304	1.69481e-09	Neuroepithelial_cell	BTG1
1.74838e-12	-2.26068	0.375	0.437	2.80423e-08	Neuroepithelial_cell	SPARC
1.35699e-07	-1.68958	0.488	0.502	0.00217648	Neuroepithelial_cell	CLU
6.19363e-07	-1.04795	0.268	0.342	0.00993396	Neuroepithelial_cell	ID2
1.62499e-06	-2.51793	0.367	0.391	0.0260632	Neuroepithelial_cell	COL3A1
0	3.35652	0.859	0.125	0	Smooth_muscle_cells	CXCL12
0	3.34066	0.962	0.269	0	Smooth_muscle_cells	CCDC80
0	3.28038	0.992	0.285	0	Smooth_muscle_cells	C3
0	3.20697	0.859	0.085	0	Smooth_muscle_cells	EGFL6
0	2.96932	0.833	0.071	0	Smooth_muscle_cells	CLDN1
0	2.93204	0.31	0.014	0	Smooth_muscle_cells	PRG4
0	2.6347	0.79	0.07	0	Smooth_muscle_cells	PIEZO2
0	2.33632	0.847	0.169	0	Smooth_muscle_cells	SERPINE1
0	2.26455	0.845	0.132	0	Smooth_muscle_cells	PTGIS
0	2.25211	0.706	0.059	0	Smooth_muscle_cells	FLRT2
0	2.21442	0.821	0.071	0	Smooth_muscle_cells	EFEMP1
0	2.06415	0.581	0.056	0	Smooth_muscle_cells	FGF7
0	2.05303	0.744	0.103	0	Smooth_muscle_cells	GAS1
0	2.03987	0.627	0.068	0	Smooth_muscle_cells	PHLDB2
0	1.9856	0.853	0.194	0	Smooth_muscle_cells	CFI
0	1.95283	0.75	0.103	0	Smooth_muscle_cells	ABI3BP
0	1.78953	0.476	0.023	0	Smooth_muscle_cells	TDO2
0	1.78764	0.452	0.025	0	Smooth_muscle_cells	CALB2
0	1.76919	0.633	0.086	0	Smooth_muscle_cells	IGF1
0	1.75444	0.726	0.119	0	Smooth_muscle_cells	MAF
0	1.6912	0.528	0.045	0	Smooth_muscle_cells	ALDH1A3
0	1.62654	0.677	0.1	0	Smooth_muscle_cells	MEIS2
0	1.62585	0.492	0.042	0	Smooth_muscle_cells	CA12
0	1.61452	0.377	0.009	0	Smooth_muscle_cells	DPYS
0	1.60029	0.512	0.046	0	Smooth_muscle_cells	AC015712.2
0	1.57561	0.462	0.021	0	Smooth_muscle_cells	CCBE1
0	1.57519	0.659	0.083	0	Smooth_muscle_cells	PDPN
0	1.45243	0.276	0.004	0	Smooth_muscle_cells	CXCL6
0	1.42355	0.411	0.026	0	Smooth_muscle_cells	RGS4
0	1.22504	0.415	0.017	0	Smooth_muscle_cells	DPP4
0	1.19071	0.397	0.018	0	Smooth_muscle_cells	OSR1
0	1.04935	0.363	0.014	0	Smooth_muscle_cells	DSC3
0	1.0207	0.308	0.015	0	Smooth_muscle_cells	KLHL4
7.30818e-308	1.48165	0.556	0.064	1.17216e-303	Smooth_muscle_cells	VCAM1
3.70224e-304	1.44214	0.548	0.063	5.93802e-300	Smooth_muscle_cells	PDGFRA
2.31983e-300	2.08822	0.845	0.184	3.72077e-296	Smooth_muscle_cells	RARRES1
4.83836e-299	1.20258	0.458	0.043	7.76025e-295	Smooth_muscle_cells	HSPB8
4.15382e-298	2.22913	0.734	0.136	6.66232e-294	Smooth_muscle_cells	PTGDS
4.93531e-288	1.18738	0.377	0.029	7.91574e-284	Smooth_muscle_cells	AC027288.3
6.46173e-284	1.9798	0.821	0.181	1.0364e-279	Smooth_muscle_cells	FBLN1
4.3198e-271	1.07232	0.331	0.022	6.92854e-267	Smooth_muscle_cells	TNFSF14
4.89461e-268	1.91331	0.71	0.141	7.85046e-264	Smooth_muscle_cells	PLS3
1.13501e-262	1.53769	0.685	0.119	1.82045e-258	Smooth_muscle_cells	LAMA4
1.2474e-257	2.06701	0.933	0.345	2.0007e-253	Smooth_muscle_cells	C1R
1.84233e-252	1.54802	0.681	0.124	2.95491e-248	Smooth_muscle_cells	DAB2
1.01211e-245	1.77313	0.599	0.1	1.62332e-241	Smooth_muscle_cells	APOE
3.71198e-240	1.29738	0.526	0.073	5.95364e-236	Smooth_muscle_cells	FAM155A
1.27725e-236	1.68236	0.78	0.19	2.04858e-232	Smooth_muscle_cells	IL1R1
1.31669e-235	2.20607	0.575	0.096	2.11184e-231	Smooth_muscle_cells	CXCL2
3.99448e-234	1.90005	0.613	0.114	6.40675e-230	Smooth_muscle_cells	FAM227B
2.56274e-230	1.64972	0.456	0.059	4.11038e-226	Smooth_muscle_cells	SEMA3D
5.6061e-225	1.91663	0.857	0.267	8.99162e-221	Smooth_muscle_cells	LIMA1
6.29978e-225	1.31815	0.665	0.126	1.01042e-220	Smooth_muscle_cells	IGFBP4
3.9855e-224	1.81702	0.683	0.138	6.39235e-220	Smooth_muscle_cells	PDLIM3
4.84383e-222	1.87477	0.675	0.145	7.76903e-218	Smooth_muscle_cells	ADAMTS1
7.96503e-219	1.6773	0.554	0.094	1.27751e-214	Smooth_muscle_cells	HEG1
1.79531e-218	1.75777	0.94	0.293	2.8795e-214	Smooth_muscle_cells	DCN
6.27924e-217	1.44406	0.617	0.121	1.00713e-212	Smooth_muscle_cells	LXN
2.10302e-216	1.58784	0.669	0.137	3.37304e-212	Smooth_muscle_cells	LSAMP
3.98664e-216	1.48707	0.635	0.125	6.39418e-212	Smooth_muscle_cells	SLIT3
4.34366e-211	1.50642	0.677	0.142	6.9668e-207	Smooth_muscle_cells	BICC1
9.8484e-209	1.21445	0.345	0.035	1.57959e-204	Smooth_muscle_cells	COL6A6
3.12206e-208	1.54698	0.974	0.337	5.00747e-204	Smooth_muscle_cells	COL1A1
2.96107e-207	1.57168	0.627	0.13	4.74926e-203	Smooth_muscle_cells	METTL7A
4.11353e-201	1.58614	0.79	0.218	6.59768e-197	Smooth_muscle_cells	RARRES2
7.5215e-200	1.5399	0.605	0.123	1.20637e-195	Smooth_muscle_cells	MXRA5
7.92168e-199	1.18779	0.47	0.068	1.27056e-194	Smooth_muscle_cells	OGN
2.36722e-196	1.66212	0.673	0.158	3.79678e-192	Smooth_muscle_cells	ZFPM2
4.46537e-193	1.02196	0.468	0.072	7.16201e-189	Smooth_muscle_cells	DRAM1
1.04851e-192	1.45867	0.974	0.359	1.68171e-188	Smooth_muscle_cells	COL3A1
1.14554e-190	1.505	0.905	0.331	1.83734e-186	Smooth_muscle_cells	C1S
1.7071e-190	1.44162	0.373	0.047	2.73801e-186	Smooth_muscle_cells	ALDH1A1
5.74391e-190	1.15587	0.262	0.02	9.21266e-186	Smooth_muscle_cells	PLA2G2A
4.12865e-188	1.1276	0.401	0.054	6.62195e-184	Smooth_muscle_cells	SVEP1
7.54387e-187	1.27153	0.792	0.212	1.20996e-182	Smooth_muscle_cells	CFH
3.40597e-182	1.48858	0.988	0.442	5.46284e-178	Smooth_muscle_cells	COL1A2
2.47378e-180	1.0242	0.488	0.082	3.96769e-176	Smooth_muscle_cells	NR2F1
2.80942e-180	1.17028	0.569	0.111	4.50603e-176	Smooth_muscle_cells	FILIP1L
5.4114e-180	1.17743	0.593	0.12	8.67935e-176	Smooth_muscle_cells	MEG3
1.71679e-178	1.2072	0.52	0.097	2.75356e-174	Smooth_muscle_cells	ROR1
1.47809e-176	1.47983	0.486	0.088	2.37071e-172	Smooth_muscle_cells	ADAMTS9
2.71087e-176	1.08737	0.532	0.098	4.34796e-172	Smooth_muscle_cells	LOX
4.72236e-175	1.34749	0.659	0.162	7.57419e-171	Smooth_muscle_cells	GXYLT2
8.47823e-174	1.19841	0.5	0.093	1.35982e-169	Smooth_muscle_cells	PTPN13
7.66856e-173	2.2199	0.911	0.481	1.22996e-168	Smooth_muscle_cells	TIMP1
4.95709e-167	1.39883	0.563	0.12	7.95068e-163	Smooth_muscle_cells	NR4A3
2.73397e-165	1.57269	0.391	0.059	4.38502e-161	Smooth_muscle_cells	IL6
3.63944e-165	1.60128	0.425	0.071	5.8373e-161	Smooth_muscle_cells	SEMA4A
4.76147e-165	1.5612	0.899	0.415	7.63692e-161	Smooth_muscle_cells	SERPING1
2.11287e-164	1.21881	0.544	0.112	3.38883e-160	Smooth_muscle_cells	LDB2
2.83176e-162	1.06349	0.401	0.063	4.54185e-158	Smooth_muscle_cells	SYT1
1.216e-161	1.08428	0.655	0.152	1.95035e-157	Smooth_muscle_cells	CDH11
3.79179e-157	1.39517	0.438	0.08	6.08166e-153	Smooth_muscle_cells	KIAA1324L
5.2504e-157	1.03139	0.51	0.106	8.42111e-153	Smooth_muscle_cells	C2
7.41837e-155	1.19321	0.591	0.145	1.18983e-150	Smooth_muscle_cells	PDLIM1
4.31253e-154	1.28737	0.667	0.177	6.91687e-150	Smooth_muscle_cells	BNC2
4.66235e-154	1.33512	0.651	0.183	7.47795e-150	Smooth_muscle_cells	GFM1
6.67171e-154	1.35596	0.345	0.05	1.07008e-149	Smooth_muscle_cells	SLC39A8
8.20771e-154	1.34669	0.855	0.314	1.31643e-149	Smooth_muscle_cells	NNMT
2.15661e-153	1.25811	0.53	0.116	3.45898e-149	Smooth_muscle_cells	EFNA5
9.32293e-151	1.17035	0.506	0.111	1.49531e-146	Smooth_muscle_cells	HS2ST1
6.74265e-149	1.16982	0.409	0.072	1.08145e-144	Smooth_muscle_cells	CACNA2D1
5.21624e-146	1.19801	0.631	0.165	8.36632e-142	Smooth_muscle_cells	DPYSL3
1.6603e-144	1.15557	0.98	0.497	2.66296e-140	Smooth_muscle_cells	CALD1
2.23964e-144	1.22367	0.593	0.153	3.59217e-140	Smooth_muscle_cells	GALNT1
5.93312e-143	1.71406	0.891	0.443	9.51613e-139	Smooth_muscle_cells	SOD2
1.43991e-142	1.15507	0.625	0.169	2.30947e-138	Smooth_muscle_cells	IER3
1.35693e-141	1.19811	0.482	0.101	2.17639e-137	Smooth_muscle_cells	GPRC5A
2.72424e-141	1.13018	0.593	0.146	4.36941e-137	Smooth_muscle_cells	MAN1A1
7.24502e-141	1.54328	0.813	0.327	1.16203e-136	Smooth_muscle_cells	NAMPT
2.28388e-139	1.04999	0.621	0.157	3.66311e-135	Smooth_muscle_cells	COL5A1
1.28283e-138	1.44414	0.706	0.226	2.05753e-134	Smooth_muscle_cells	B4GALT1
5.93852e-137	1.03563	0.528	0.127	9.52479e-133	Smooth_muscle_cells	SLC16A1
8.47228e-137	1.10991	0.558	0.137	1.35887e-132	Smooth_muscle_cells	STXBP5
2.4874e-136	1.45769	0.77	0.312	3.98955e-132	Smooth_muscle_cells	SH3GLB1
5.33938e-135	1.49626	0.665	0.206	8.56383e-131	Smooth_muscle_cells	PLIN2
5.75666e-134	1.04756	0.619	0.168	9.2331e-130	Smooth_muscle_cells	SEMA3C
1.92743e-131	1.17031	0.347	0.058	3.0914e-127	Smooth_muscle_cells	PROCR
3.44123e-130	1.7825	0.478	0.112	5.51939e-126	Smooth_muscle_cells	PLAT
2.7692e-129	1.05909	0.29	0.041	4.44152e-125	Smooth_muscle_cells	F3
1.62784e-127	1.16118	0.933	0.407	2.6109e-123	Smooth_muscle_cells	SPARC
1.6998e-126	1.09584	0.581	0.156	2.72631e-122	Smooth_muscle_cells	CAV1
1.28092e-124	1.05333	0.688	0.211	2.05446e-120	Smooth_muscle_cells	EPSTI1
1.38259e-124	1.06611	0.581	0.154	2.21753e-120	Smooth_muscle_cells	MMP2
2.91276e-123	1.0703	0.688	0.218	4.67177e-119	Smooth_muscle_cells	RAB31
1.08149e-120	1.1532	0.508	0.128	1.73461e-116	Smooth_muscle_cells	ROR2
1.49261e-118	1.34289	0.776	0.319	2.39399e-114	Smooth_muscle_cells	NFKBIZ
8.23383e-114	1.05015	0.435	0.104	1.32062e-109	Smooth_muscle_cells	CRLS1
1.5535e-113	1.1618	0.649	0.214	2.49166e-109	Smooth_muscle_cells	PLOD2
3.61104e-111	1.36127	0.722	0.28	5.79175e-107	Smooth_muscle_cells	CLIC4
5.51215e-104	1.00657	0.948	0.916	8.84094e-100	Smooth_muscle_cells	TPT1
2.88665e-103	1.2637	0.526	0.148	4.6299e-99	Smooth_muscle_cells	GPC6
2.74416e-101	1.41792	0.308	0.059	4.40136e-97	Smooth_muscle_cells	TXNL4B
7.28169e-101	1.01217	0.589	0.194	1.16791e-96	Smooth_muscle_cells	FAM114A1
2.39535e-100	1.21386	0.825	0.398	3.84191e-96	Smooth_muscle_cells	CYR61
3.25998e-100	1.06601	0.855	0.409	5.22868e-96	Smooth_muscle_cells	ANXA1
7.22065e-100	1.05806	0.619	0.212	1.15812e-95	Smooth_muscle_cells	PDLIM5
2.9512e-98	1.12748	0.714	0.278	4.73343e-94	Smooth_muscle_cells	GBP1
3.68992e-96	1.18478	0.72	0.31	5.91826e-92	Smooth_muscle_cells	IL6ST
9.57615e-95	1.05076	0.931	0.589	1.53592e-90	Smooth_muscle_cells	SAT1
6.71662e-94	1.11607	0.857	0.493	1.07728e-89	Smooth_muscle_cells	CCSER1
9.89027e-92	1.12303	0.401	0.107	1.5863e-87	Smooth_muscle_cells	CENPW
2.76858e-90	1.05205	0.95	0.629	4.44052e-86	Smooth_muscle_cells	ERCC1
1.96915e-87	1.17254	0.942	0.618	3.15832e-83	Smooth_muscle_cells	EGR1
1.31995e-86	1.06655	0.756	0.336	2.11706e-82	Smooth_muscle_cells	PLXDC2
7.31116e-82	1.15339	0.885	0.542	1.17264e-77	Smooth_muscle_cells	S100A10
1.97097e-81	1.31223	0.389	0.104	3.16124e-77	Smooth_muscle_cells	CCL2
3.27208e-52	-1.78916	0.044	0.374	5.24808e-48	Smooth_muscle_cells	SPINT2
4.8662e-42	-2.49643	0.071	0.353	7.8049e-38	Smooth_muscle_cells	C1orf186
5.23683e-39	-1.88255	0.2	0.453	8.39936e-35	Smooth_muscle_cells	S100A4
4.60137e-36	-1.53097	0.26	0.493	7.38014e-32	Smooth_muscle_cells	HSPA1B
6.42295e-36	-1.93543	0.069	0.322	1.03018e-31	Smooth_muscle_cells	EPCAM
7.16677e-33	-1.65322	0.079	0.321	1.14948e-28	Smooth_muscle_cells	MECOM
1.27785e-31	-1.13486	0.942	0.893	2.04955e-27	Smooth_muscle_cells	HSP90AA1
1.81004e-28	-1.25654	0.079	0.297	2.90313e-24	Smooth_muscle_cells	PAX8
1.43004e-27	-1.29385	0.085	0.298	2.29364e-23	Smooth_muscle_cells	PAX8.AS1
8.96745e-27	-1.45364	0.367	0.533	1.43829e-22	Smooth_muscle_cells	HSPA1A
4.84955e-26	-1.77047	0.067	0.269	7.77819e-22	Smooth_muscle_cells	AC024230.1
2.16788e-25	-1.07346	0.067	0.274	3.47707e-21	Smooth_muscle_cells	LITAF
8.66899e-23	-2.23596	0.103	0.287	1.39042e-18	Smooth_muscle_cells	SRGN
1.03619e-19	-1.35168	0.317	0.44	1.66195e-15	Smooth_muscle_cells	UBE2D2
2.44954e-17	-1.05558	0.2	0.36	3.92882e-13	Smooth_muscle_cells	TSC22D3
6.98671e-15	-1.89804	0.563	0.569	1.1206e-10	Smooth_muscle_cells	CD74
9.67406e-15	-1.7969	0.131	0.264	1.55162e-10	Smooth_muscle_cells	TIMP3
3.05659e-14	-1.04547	0.304	0.408	4.90246e-10	Smooth_muscle_cells	CD9
2.36074e-13	-1.04477	0.294	0.411	3.78639e-09	Smooth_muscle_cells	GADD45B
1.63746e-11	-1.44695	0.306	0.381	2.62632e-07	Smooth_muscle_cells	WFDC2
2.14555e-10	-1.17056	0.173	0.277	3.44125e-06	Smooth_muscle_cells	HMGB2
3.73828e-10	-1.06783	0.24	0.328	5.99582e-06	Smooth_muscle_cells	STMN1
1.09795e-08	-1.65118	0.206	0.29	0.000176101	Smooth_muscle_cells	HLA.DPB1
3.29427e-08	-1.01921	0.48	0.483	0.000528369	Smooth_muscle_cells	HSPE1
5.06094e-08	-1.11712	0.381	0.418	0.000811724	Smooth_muscle_cells	DNAJB1
1.12349e-07	-1.24419	0.833	0.801	0.00180196	Smooth_muscle_cells	RPL8
2.23287e-06	-1.73659	0.232	0.286	0.0358129	Smooth_muscle_cells	HLA.DPA1
0	5.47606	0.544	0.07	0	B_cell	JCHAIN
0	5.3987	0.531	0.066	0	B_cell	ENAM
0	5.32322	0.444	0.03	0	B_cell	IGHG2
0	5.08133	0.581	0.032	0	B_cell	IGHM
0	4.14675	0.262	0.011	0	B_cell	IGLV3.1
0	3.36433	0.482	0.021	0	B_cell	MS4A1
0	3.13137	0.512	0.015	0	B_cell	MZB1
0	3.07676	0.316	0.011	0	B_cell	IGHD
0	3.02196	0.459	0.062	0	B_cell	BANK1
0	2.05511	0.376	0.015	0	B_cell	TNFRSF13C
0	2.04182	0.433	0.05	0	B_cell	PIM2
0	1.95565	0.426	0.006	0	B_cell	FCRL5
0	1.57298	0.347	0.012	0	B_cell	POU2AF1
1.37418e-306	6.6505	0.634	0.149	2.20405e-302	B_cell	IGHG3
3.57319e-304	1.41651	0.324	0.025	5.73105e-300	B_cell	DERL3
1.73317e-298	1.48125	0.301	0.021	2.77983e-294	B_cell	CD79B
5.47768e-297	6.90331	0.884	0.396	8.78566e-293	B_cell	IGKC
2.35191e-285	1.56438	0.398	0.045	3.77223e-281	B_cell	FAM46C
2.62319e-279	1.42122	0.357	0.035	4.20733e-275	B_cell	CD38
4.5126e-276	1.42648	0.31	0.025	7.23777e-272	B_cell	BLNK
2.69923e-275	1.70146	0.37	0.04	4.32929e-271	B_cell	POU2F2
6.45081e-263	1.43611	0.367	0.04	1.03465e-258	B_cell	SLAMF7
1.08644e-258	6.97055	0.719	0.254	1.74254e-254	B_cell	IGHG1
1.02828e-240	6.44014	0.581	0.149	1.64926e-236	B_cell	IGHG4
1.60441e-238	2.05818	0.432	0.071	2.57332e-234	B_cell	CD37
2.07941e-232	2.03918	0.626	0.16	3.33517e-228	B_cell	MEF2C
3.86651e-232	1.29862	0.306	0.032	6.2015e-228	B_cell	EAF2
2.39757e-209	2.16647	0.634	0.198	3.84546e-205	B_cell	ST6GAL1
1.53196e-203	-2.77352	0.328	0.817	2.45712e-199	B_cell	S100A6
5.52026e-203	1.36873	0.27	0.028	8.85395e-199	B_cell	TMEM156
3.10776e-199	-2.96298	0.12	0.724	4.98453e-195	B_cell	IFITM3
1.75569e-188	1.08378	0.283	0.033	2.81595e-184	B_cell	IFNG.AS1
1.6016e-185	1.55768	0.395	0.074	2.5688e-181	B_cell	PLCG2
9.99084e-185	1.37431	0.458	0.098	1.60243e-180	B_cell	ISG20
7.99299e-173	1.35952	0.407	0.079	1.282e-168	B_cell	IKZF3
1.6177e-172	1.41133	0.388	0.071	2.59463e-168	B_cell	RHOH
9.35046e-167	1.28883	0.321	0.052	1.49972e-162	B_cell	HSH2D
1.5947e-158	2.46831	0.362	0.076	2.55775e-154	B_cell	AFF3
3.25123e-155	1.47394	0.37	0.078	5.21465e-151	B_cell	GNG7
6.2982e-155	1.07391	0.361	0.067	1.01017e-150	B_cell	CYTIP
2.38862e-150	1.62849	0.433	0.104	3.8311e-146	B_cell	CD52
3.78577e-148	6.1011	0.38	0.087	6.07199e-144	B_cell	IGLC3
6.10406e-143	-2.56468	0.111	0.625	9.7903e-139	B_cell	CST3
1.02674e-141	1.2462	0.313	0.058	1.64678e-137	B_cell	AC007384.1
2.16603e-141	-2.56491	0.116	0.618	3.4741e-137	B_cell	AC136475.1
7.14058e-141	1.47111	0.411	0.104	1.14528e-136	B_cell	SEL1L3
4.25892e-137	6.30304	0.456	0.138	6.83089e-133	B_cell	IGLC2
3.59119e-136	1.44728	0.533	0.169	5.7599e-132	B_cell	CXCR4
2.78771e-133	1.6185	0.411	0.104	4.4712e-129	B_cell	CD69
3.30092e-127	1.4066	0.473	0.142	5.29435e-123	B_cell	SMAP2
1.6681e-126	1.1497	0.314	0.063	2.67547e-122	B_cell	PRDM1
5.26552e-124	-2.25686	0.126	0.595	8.44537e-120	B_cell	S100A10
1.46609e-122	-2.18395	0.299	0.689	2.35147e-118	B_cell	BX470102.1
3.62155e-122	1.1713	0.301	0.062	5.8086e-118	B_cell	RAB30
1.18466e-121	-3.40631	0.07	0.536	1.90008e-117	B_cell	CLU
2.05695e-117	-1.95997	0.046	0.514	3.29915e-113	B_cell	BEX3
8.09863e-117	1.2156	0.454	0.136	1.29894e-112	B_cell	PDE4B
1.82467e-114	-2.22364	0.415	0.723	2.92659e-110	B_cell	VIM
1.90953e-114	1.47787	0.475	0.161	3.0627e-110	B_cell	SP140
1.02556e-113	-1.95631	0.093	0.547	1.6449e-109	B_cell	LMNA
2.76336e-112	1.27706	0.351	0.086	4.43215e-108	B_cell	CD53
1.1111e-111	1.83151	0.447	0.163	1.78209e-107	B_cell	SEC11C
1.80144e-111	-2.6641	0.107	0.555	2.88933e-107	B_cell	CALD1
7.69463e-109	-1.8794	0.206	0.608	1.23414e-104	B_cell	ANXA2
1.71807e-108	-3.1433	0.107	0.536	2.75561e-104	B_cell	MT2A
3.17333e-107	-1.12474	0.816	0.933	5.08971e-103	B_cell	TMSB10
1.12299e-104	-1.68369	0.227	0.62	1.80116e-100	B_cell	CD63
1.95119e-102	1.01	0.907	0.541	3.12951e-98	B_cell	CD74
3.17571e-102	-1.96336	0.046	0.472	5.09353e-98	B_cell	SERPING1
1.25376e-100	-2.58515	0.034	0.451	2.0109e-96	B_cell	CYR61
1.47677e-99	1.37388	0.388	0.128	2.3686e-95	B_cell	FKBP11
8.51745e-98	1.54744	0.399	0.138	1.36611e-93	B_cell	CCDC65
1.06742e-97	1.29528	0.25	0.052	1.71204e-93	B_cell	RCSD1
1.32836e-97	-1.5921	0.239	0.615	2.13056e-93	B_cell	DSTN
6.92801e-96	-2.16922	0.052	0.462	1.11118e-91	B_cell	ANXA1
2.10245e-94	1.38556	0.495	0.182	3.37212e-90	B_cell	RGS1
1.6721e-92	-1.3669	0.406	0.729	2.68189e-88	B_cell	ITM2B
2.74427e-92	1.42631	0.287	0.072	4.40154e-88	B_cell	PRKCB
1.04574e-89	-1.21647	0.459	0.762	1.67727e-85	B_cell	MYL6
1.74781e-89	1.77544	0.343	0.107	2.80331e-85	B_cell	RIPOR2
3.02951e-89	-1.27899	0.358	0.71	4.85904e-85	B_cell	CALM2
1.66659e-87	1.16711	0.261	0.063	2.67305e-83	B_cell	ADAM28
2.39312e-87	-2.18094	0.149	0.531	3.83832e-83	B_cell	TIMP1
3.43062e-87	1.43007	0.691	0.401	5.50237e-83	B_cell	TXNIP
3.85667e-87	-1.54196	0.107	0.493	6.18572e-83	B_cell	S100A11
3.99596e-87	-1.59154	0.029	0.414	6.40912e-83	B_cell	APP
7.22121e-86	1.12794	0.28	0.071	1.15821e-81	B_cell	UBXN11
1.04728e-84	1.17095	0.428	0.163	1.67973e-80	B_cell	PLPP5
1.26819e-84	-1.06377	0.531	0.808	2.03404e-80	B_cell	ACTG1
2.0953e-84	-1.77707	0.056	0.43	3.36065e-80	B_cell	CD9
5.6861e-82	-1.83149	0.042	0.412	9.11994e-78	B_cell	KIAA1217
2.24732e-81	1.21986	0.355	0.112	3.60448e-77	B_cell	DOCK8
3.19161e-81	-1.42017	0.146	0.519	5.11903e-77	B_cell	LAPTM4A
3.99881e-81	-3.14967	0.109	0.46	6.4137e-77	B_cell	SPARC
1.59405e-80	-1.71516	0.048	0.418	2.55669e-76	B_cell	TSC22D1
1.62373e-80	1.42216	0.376	0.135	2.60431e-76	B_cell	CPEB4
4.72121e-80	-1.61496	0.03	0.394	7.57235e-76	B_cell	CNN3
8.36469e-80	1.15923	0.395	0.138	1.34161e-75	B_cell	HLA.DQA1
9.90831e-80	-1.8761	0.029	0.386	1.58919e-75	B_cell	C1S
1.17861e-79	-1.63927	0.193	0.561	1.89037e-75	B_cell	CTSB
1.74676e-79	1.49144	0.499	0.232	2.80163e-75	B_cell	FCHSD2
4.07234e-79	1.64898	0.433	0.183	6.53162e-75	B_cell	RALGPS2
8.70326e-79	-1.9317	0.045	0.401	1.39592e-74	B_cell	C1R
1.6564e-78	1.12914	0.302	0.086	2.65671e-74	B_cell	ARHGAP15
5.37773e-78	-2.67156	0.157	0.489	8.62534e-74	B_cell	IFI27
7.31277e-76	-2.9264	0.087	0.434	1.1729e-71	B_cell	FN1
4.78942e-75	1.23637	0.477	0.206	7.68176e-71	B_cell	45175
4.79634e-75	1.39637	0.523	0.273	7.69285e-71	B_cell	HERPUD1
5.06337e-74	-1.21645	0.126	0.492	8.12114e-70	B_cell	RTN4
5.70935e-74	-2.09226	0.26	0.563	9.15722e-70	B_cell	LGALS1
1.62798e-73	-1.10667	0.407	0.729	2.61112e-69	B_cell	NUCKS1
2.8517e-73	-1.95966	0.031	0.366	4.57385e-69	B_cell	NNMT
5.54604e-73	-2.23802	0.018	0.349	8.89529e-69	B_cell	EMP1
5.65278e-73	-1.25571	0.086	0.447	9.06649e-69	B_cell	TCEAL4
7.17821e-73	-1.55785	0.038	0.383	1.15131e-68	B_cell	PLXDC2
2.60958e-72	1.07582	0.262	0.073	4.1855e-68	B_cell	GLCCI1
3.44505e-72	-1.49064	0.033	0.367	5.52552e-68	B_cell	SERPINH1
1.47319e-71	1.09328	0.43	0.173	2.36285e-67	B_cell	BIRC3
5.87229e-71	-1.32198	0.148	0.494	9.41856e-67	B_cell	PTTG1IP
3.79208e-69	1.08157	0.335	0.119	6.08212e-65	B_cell	EIF2AK3
5.68765e-69	1.84294	0.443	0.222	9.12241e-65	B_cell	XBP1
2.8317e-68	-1.07497	0.464	0.727	4.54177e-64	B_cell	TPM4
4.99168e-68	-1.41643	0.038	0.364	8.00615e-64	B_cell	S100A13
3.19343e-67	-1.46707	0.355	0.639	5.12195e-63	B_cell	PSAP
4.5595e-67	-1.40751	0.041	0.366	7.31298e-63	B_cell	NFIA
4.84739e-67	-2.22337	0.029	0.344	7.77472e-63	B_cell	CTGF
8.55754e-67	-1.07229	0.247	0.592	1.37254e-62	B_cell	MYL12B
1.40442e-66	-1.58794	0.036	0.352	2.25254e-62	B_cell	TIMP2
1.47657e-66	-1.0144	0.439	0.718	2.36827e-62	B_cell	SRP14
6.92951e-66	-1.68268	0.036	0.352	1.11142e-61	B_cell	TPM1
8.02806e-66	-1.38991	0.219	0.546	1.28762e-61	B_cell	VMP1
8.41453e-66	-1.75696	0.139	0.464	1.34961e-61	B_cell	S100A4
3.86827e-64	-1.18026	0.053	0.369	6.20431e-60	B_cell	TCEAL9
1.33072e-63	-1.22299	0.019	0.321	2.13434e-59	B_cell	LGALS3BP
4.63305e-63	-1.36018	0.337	0.636	7.43095e-59	B_cell	FTH1
1.11851e-62	-1.31325	0.35	0.657	1.79397e-58	B_cell	EGR1
1.70144e-62	-1.03939	0.41	0.675	2.72894e-58	B_cell	PDIA3
2.88365e-62	-1.37144	0.026	0.325	4.62508e-58	B_cell	SPATS2L
3.00325e-62	-1.51501	0.033	0.332	4.81691e-58	B_cell	KRT18
3.27824e-62	-1.5567	0.034	0.336	5.25796e-58	B_cell	CAVIN1
7.2783e-62	-1.47044	0.048	0.357	1.16737e-57	B_cell	PLCB1
2.15448e-61	-1.16377	0.023	0.323	3.45557e-57	B_cell	FGFR1
2.80059e-61	-1.18477	0.432	0.69	4.49186e-57	B_cell	COX6C
7.42796e-61	-1.9689	0.04	0.333	1.19137e-56	B_cell	MT1E
7.89217e-61	1.4438	0.391	0.17	1.26583e-56	B_cell	ANKRD44
8.43965e-61	-1.02889	0.135	0.474	1.35364e-56	B_cell	APLP2
4.70559e-60	-3.26732	0.029	0.315	7.54729e-56	B_cell	MGP
9.33566e-60	-3.31184	0.038	0.325	1.49735e-55	B_cell	C12orf60
1.51261e-59	-1.25305	0.175	0.478	2.42608e-55	B_cell	ANXA5
5.53126e-59	-1.5789	0.01	0.289	8.87158e-55	B_cell	PCOLCE
6.83255e-59	2.46404	0.545	0.42	1.09587e-54	B_cell	SSR4
1.11317e-58	-1.15727	0.238	0.546	1.78542e-54	B_cell	SEM1
1.28302e-58	1.09269	0.398	0.179	2.05784e-54	B_cell	NDUFAF6
2.16112e-58	-1.46043	0.074	0.38	3.46622e-54	B_cell	MEIS1
2.29546e-58	-3.821	0.22	0.49	3.68169e-54	B_cell	COL1A2
4.10744e-58	1.48633	0.318	0.123	6.58793e-54	B_cell	HIST1H2BG
1.05073e-57	-1.6875	0.018	0.297	1.68526e-53	B_cell	TM4SF1
1.30393e-57	-1.20353	0.109	0.407	2.09137e-53	B_cell	AL450992.1
4.38612e-57	-1.15855	0.053	0.349	7.0349e-53	B_cell	PPFIBP1
1.83411e-56	-1.29817	0.102	0.407	2.94173e-52	B_cell	SOX4
2.62258e-56	-1.31061	0.086	0.38	4.20635e-52	B_cell	BHLHE40
1.79138e-55	-1.41321	0.161	0.463	2.8732e-51	B_cell	ATF3
2.3045e-55	-1.16413	0.018	0.29	3.69619e-51	B_cell	NFIB
2.46021e-55	-1.1357	0.027	0.306	3.94593e-51	B_cell	MYOF
2.64566e-55	-1.30049	0.016	0.289	4.24337e-51	B_cell	TPM2
3.27404e-55	-1.12726	0.031	0.311	5.25124e-51	B_cell	UACA
5.0162e-55	-1.62433	0.01	0.275	8.04549e-51	B_cell	BGN
6.01635e-55	-1.95545	0.031	0.302	9.64962e-51	B_cell	COL5A2
8.41281e-55	-1.20328	0.042	0.327	1.34933e-50	B_cell	DLGAP4.AS1
1.31468e-54	-3.75436	0.142	0.41	2.10862e-50	B_cell	COL3A1
2.96026e-54	-1.21303	0.21	0.5	4.74797e-50	B_cell	ITGB1
4.22312e-54	-1.2288	0.011	0.275	6.77346e-50	B_cell	MYL9
5.21602e-54	-1.2002	0.041	0.319	8.36597e-50	B_cell	PARD3
8.4357e-54	-1.00315	0.142	0.457	1.353e-49	B_cell	TUBB
9.99494e-54	1.08953	0.462	0.238	1.60309e-49	B_cell	DDHD2
1.07749e-53	-1.35497	0.031	0.307	1.72818e-49	B_cell	TCF7L2
1.30001e-53	-1.10518	0.029	0.302	2.08509e-49	B_cell	PBX1
1.31452e-53	-1.06181	0.023	0.288	2.10836e-49	B_cell	FOSL2
1.99845e-53	-1.26473	0.012	0.275	3.20531e-49	B_cell	NUPR1
2.49713e-53	-1.1404	0.019	0.285	4.00515e-49	B_cell	WWTR1
2.67255e-53	-1.14491	0.214	0.517	4.28651e-49	B_cell	HSPB1
2.82519e-53	-1.33657	0.036	0.308	4.53131e-49	B_cell	PAX8.AS1
4.13518e-53	-1.15899	0.238	0.524	6.63241e-49	B_cell	TXN
8.27775e-53	-3.37943	0.083	0.345	1.32767e-48	B_cell	DCN
9.0318e-53	-1.77806	0.03	0.294	1.44861e-48	B_cell	AEBP1
1.29011e-52	-1.08394	0.04	0.314	2.0692e-48	B_cell	ENAH
1.59399e-52	-1.83541	0.122	0.398	2.55661e-48	B_cell	WFDC2
2.09167e-52	-1.27871	0.037	0.306	3.35483e-48	B_cell	PAX8
3.33564e-52	-1.06956	0.014	0.272	5.35004e-48	B_cell	ACTN1
6.94727e-52	-1.73644	0.061	0.329	1.11427e-47	B_cell	EPCAM
1.14976e-51	1.55249	0.257	0.095	1.8441e-47	B_cell	BCL11A
1.18892e-51	-1.48813	0.008	0.26	1.90691e-47	B_cell	CFH
1.78862e-51	-1.53261	0.012	0.266	2.86876e-47	B_cell	RARRES2
3.56304e-51	-1.20444	0.023	0.281	5.71476e-47	B_cell	KRT8
5.15863e-51	-1.51389	0.059	0.329	8.27393e-47	B_cell	MECOM
1.25588e-50	1.073	0.499	0.269	2.0143e-46	B_cell	STK17B
1.86808e-50	-1.17012	0.03	0.291	2.99621e-46	B_cell	CTSL
2.52635e-50	-1.12822	0.026	0.284	4.05201e-46	B_cell	GSN
4.56827e-50	-1.00041	0.033	0.293	7.32704e-46	B_cell	CRIP2
1.34408e-49	1.30259	0.317	0.133	2.15578e-45	B_cell	LYN
1.51482e-49	-1.51717	0.015	0.261	2.42962e-45	B_cell	COL6A1
2.603e-49	-1.02765	0.044	0.31	4.17495e-45	B_cell	CDC42BPA
7.16615e-49	-1.07754	0.257	0.535	1.14938e-44	B_cell	ENO1
7.37462e-49	-1.30542	0.169	0.438	1.18282e-44	B_cell	TPI1
1.4021e-48	-1.07461	0.022	0.269	2.24883e-44	B_cell	MYO10
1.76772e-48	-1.14323	0.012	0.255	2.83524e-44	B_cell	PLOD2
3.79623e-48	-2.12927	0.082	0.34	6.08877e-44	B_cell	C3
3.93636e-48	-2.02044	0.029	0.275	6.31353e-44	B_cell	TIMP3
5.61464e-48	-2.05208	0.023	0.267	9.00532e-44	B_cell	VCAN
6.18e-48	-1.98338	0.045	0.293	9.9121e-44	B_cell	SLPI
7.7582e-48	-1.12287	0.015	0.256	1.24434e-43	B_cell	CEBPD
8.86037e-48	-1.0895	0.214	0.477	1.42112e-43	B_cell	CALU
2.64631e-47	-1.18467	0.026	0.271	4.24442e-43	B_cell	SPON1
3.60448e-47	-1.07027	0.057	0.314	5.78122e-43	B_cell	DLD
8.18793e-47	-1.31226	0.029	0.272	1.31326e-42	B_cell	LAMB1
1.50298e-46	-1.37531	0.063	0.314	2.41062e-42	B_cell	TNFAIP2
1.69549e-46	-1.32234	0.122	0.376	2.71939e-42	B_cell	SPINT2
1.99537e-46	-1.14453	0.079	0.336	3.20037e-42	B_cell	GOLIM4
2.4166e-46	-1.03817	0.072	0.337	3.87598e-42	B_cell	PTPRG
3.32593e-46	-1.0115	0.152	0.42	5.33446e-42	B_cell	SF3B6
8.377e-46	-1.73076	0.036	0.276	1.34359e-41	B_cell	AC024230.1
1.4097e-45	-1.09624	0.019	0.254	2.26101e-41	B_cell	GLUL
1.69976e-45	-1.36884	0.068	0.316	2.72625e-41	B_cell	LIMA1
4.8725e-45	-1.31667	0.023	0.257	7.815e-41	B_cell	PALLD
7.52897e-45	-1.14015	0.142	0.397	1.20757e-40	B_cell	LGALS3
9.7425e-45	1.0301	0.542	0.336	1.5626e-40	B_cell	TSC22D3
1.43648e-44	1.16063	0.425	0.226	2.30397e-40	B_cell	NCOA3
2.11382e-44	-1.33919	0.072	0.316	3.39035e-40	B_cell	KLF10
3.09298e-44	-1.98245	0.025	0.252	4.96083e-40	B_cell	IGFBP7
8.90231e-44	-1.00519	0.098	0.347	1.42784e-39	B_cell	TSPO
1.0273e-43	1.20566	0.302	0.127	1.64769e-39	B_cell	CD83
1.28029e-43	-1.11335	0.045	0.284	2.05346e-39	B_cell	DSP
2.16261e-43	1.08415	0.337	0.157	3.46861e-39	B_cell	HIST1H2BD
3.36666e-43	-1.48108	0.026	0.252	5.39978e-39	B_cell	ELF3
6.57833e-43	-1.33925	0.061	0.297	1.0551e-38	B_cell	KCNQ1OT1
9.16585e-43	-3.33976	0.158	0.386	1.47011e-38	B_cell	COL1A1
1.89139e-42	-1.03245	0.329	0.582	3.03361e-38	B_cell	GAS5
3.52915e-42	-1.01549	0.354	0.578	5.66041e-38	B_cell	COX5B
4.91896e-42	-1.41893	0.235	0.484	7.88953e-38	B_cell	SOD2
9.38019e-42	-1.50747	0.111	0.356	1.50449e-37	B_cell	ID2
2.21757e-41	-1.00414	0.086	0.331	3.55676e-37	B_cell	PRKCI
2.31212e-41	-1.06137	0.314	0.556	3.70841e-37	B_cell	ATP5G3
8.25644e-40	-1.22947	0.365	0.579	1.32425e-35	B_cell	IFI6
1.33486e-39	1.61546	0.281	0.131	2.14098e-35	B_cell	BACH2
1.88548e-39	-1.04481	0.089	0.327	3.02412e-35	B_cell	EXT1
3.36737e-39	1.14887	0.355	0.182	5.40093e-35	B_cell	EHMT1
4.5981e-39	-1.24023	0.085	0.318	7.37489e-35	B_cell	GBP1
1.33357e-38	-2.00958	0.098	0.32	2.13891e-34	B_cell	CCDC80
1.40175e-38	-1.90451	0.048	0.257	2.24826e-34	B_cell	COL6A3
1.43825e-38	1.15397	0.294	0.132	2.30681e-34	B_cell	TEX14
1.48678e-38	-2.5915	0.045	0.251	2.38464e-34	B_cell	LUM
1.63109e-36	-1.01764	0.077	0.297	2.61611e-32	B_cell	GNGT1
2.37641e-36	-1.03291	0.221	0.445	3.81153e-32	B_cell	NDUFB9
7.11557e-36	-1.02704	0.303	0.543	1.14127e-31	B_cell	HSPA1A
1.0074e-35	-1.13016	0.089	0.303	1.61578e-31	B_cell	CTSD
1.58905e-35	-1.19997	0.139	0.369	2.54868e-31	B_cell	NAMPT
3.66821e-35	-1.01802	0.063	0.274	5.88345e-31	B_cell	NAALADL2
2.12725e-34	1.08955	0.307	0.151	3.4119e-30	B_cell	SYK
3.25445e-34	-2.42873	0.067	0.261	5.21981e-30	B_cell	SPARCL1
5.37798e-34	1.10243	0.454	0.283	8.62574e-30	B_cell	SP110
5.87748e-34	-1.16759	0.075	0.28	9.42689e-30	B_cell	KCNQ1
4.44327e-33	-1.15501	0.503	0.669	7.12657e-29	B_cell	NEAT1
5.88935e-30	-1.17607	0.167	0.358	9.44592e-26	B_cell	BST2
8.61683e-26	-1.16603	0.12	0.294	1.38205e-21	B_cell	LY6E
9.45557e-26	-1.11237	0.086	0.263	1.51658e-21	B_cell	NPAS3
1.05217e-21	1.19287	0.392	0.275	1.68757e-17	B_cell	ZCCHC7
1.74129e-19	1.00524	0.286	0.174	2.79286e-15	B_cell	STRBP
1.04404e-14	-1.33167	0.238	0.347	1.67453e-10	B_cell	C1orf186
0	2.54447	0.768	0.072	0	Neurons	TOP2A
2.43316e-299	2.31848	0.751	0.072	3.90255e-295	Neurons	MKI67
1.33108e-244	1.62872	0.549	0.045	2.13492e-240	Neurons	CDK1
1.21696e-220	2.08782	0.62	0.066	1.95188e-216	Neurons	UBE2C
6.03123e-216	2.42788	0.764	0.109	9.6735e-212	Neurons	CENPF
2.71528e-214	2.23336	0.709	0.09	4.35504e-210	Neurons	NUSAP1
7.7422e-204	1.99372	0.679	0.087	1.24177e-199	Neurons	TPX2
3.35647e-203	1.35186	0.435	0.033	5.38344e-199	Neurons	PRC1.AS1
7.09937e-190	1.36033	0.46	0.04	1.13867e-185	Neurons	KIF14
2.89566e-187	1.03455	0.287	0.014	4.64435e-183	Neurons	IQGAP3
2.84021e-170	1.61999	0.498	0.053	4.55541e-166	Neurons	BIRC5
2.03101e-164	1.28591	0.447	0.044	3.25754e-160	Neurons	DLGAP5
4.78687e-159	1.16214	0.405	0.037	7.67765e-155	Neurons	KNL1
8.98933e-159	1.48417	0.46	0.049	1.4418e-154	Neurons	CCNB1
1.11379e-147	1.17021	0.414	0.042	1.7864e-143	Neurons	KIF4A
2.94773e-144	1.4134	0.506	0.065	4.72786e-140	Neurons	PRC1
3.87417e-142	1.30813	0.485	0.06	6.21379e-138	Neurons	NUF2
4.79092e-142	1.14939	0.435	0.047	7.68415e-138	Neurons	HMMR
1.43632e-141	1.10886	0.38	0.037	2.30371e-137	Neurons	TTK
1.44335e-141	1.29874	0.401	0.041	2.31499e-137	Neurons	CDC20
7.91663e-138	1.28575	0.409	0.044	1.26975e-133	Neurons	KIF23
2.72777e-136	1.20796	0.414	0.046	4.37508e-132	Neurons	KIF2C
8.12749e-136	1.51427	0.489	0.064	1.30357e-131	Neurons	ASPM
2.25131e-134	1.36472	0.511	0.071	3.61088e-130	Neurons	UBE2T
2.65995e-132	1.16442	0.426	0.049	4.2663e-128	Neurons	CEP55
7.49557e-125	1.00123	0.418	0.05	1.20221e-120	Neurons	CDKN3
3.24423e-124	1.23531	0.451	0.059	5.20342e-120	Neurons	SGO2
1.22162e-122	1.51739	0.502	0.076	1.95935e-118	Neurons	DIAPH3
1.94969e-120	1.26084	0.43	0.056	3.12711e-116	Neurons	KIF11
2.47194e-119	1.09743	0.418	0.053	3.96475e-115	Neurons	KIF15
2.07328e-118	1.26067	0.43	0.056	3.32533e-114	Neurons	MELK
2.92209e-118	1.0899	0.376	0.043	4.68674e-114	Neurons	CDCA8
9.27863e-117	1.39727	0.426	0.056	1.4882e-112	Neurons	CENPE
2.0228e-112	1.07147	0.426	0.058	3.24437e-108	Neurons	CENPU
1.2241e-109	1.23957	0.456	0.068	1.96334e-105	Neurons	TACC3
7.33025e-107	1.56792	0.586	0.114	1.1757e-102	Neurons	PTTG1
8.12125e-92	1.04154	0.346	0.047	1.30257e-87	Neurons	AURKA
2.19404e-91	1.18061	0.388	0.059	3.51903e-87	Neurons	RAD51AP1
2.06422e-90	1.02498	0.35	0.047	3.3108e-86	Neurons	BUB1
1.54377e-84	1.07484	0.43	0.076	2.47606e-80	Neurons	ECT2
2.7845e-83	1.55745	0.759	0.255	4.46606e-79	Neurons	SMC4
3.56237e-83	2.06116	0.624	0.174	5.71369e-79	Neurons	ATAD2
1.2776e-78	1.2005	0.502	0.108	2.04915e-74	Neurons	KIF20B
7.41765e-78	1.82778	0.785	0.312	1.18972e-73	Neurons	STMN1
3.25237e-77	1.00728	0.329	0.049	5.21648e-73	Neurons	ARHGAP11B
6.27565e-77	1.0486	0.443	0.086	1.00655e-72	Neurons	NCAPD2
1.39699e-72	1.37479	0.751	0.26	2.24063e-68	Neurons	HMGB2
1.88542e-72	1.23014	0.494	0.114	3.02402e-68	Neurons	HMGB3
3.94788e-68	1.06322	0.439	0.096	6.33201e-64	Neurons	CCDC34
1.757e-67	1.2102	0.498	0.121	2.81806e-63	Neurons	SMC2
5.04032e-66	1.0719	0.342	0.061	8.08417e-62	Neurons	NMU
2.18194e-63	1.19107	0.485	0.12	3.49961e-59	Neurons	KPNA2
1.22623e-57	1.19189	0.443	0.111	1.96676e-53	Neurons	CKAP2
8.20215e-56	1.11774	0.468	0.122	1.31554e-51	Neurons	AC011447.3
1.06794e-55	1.02496	0.447	0.114	1.71288e-51	Neurons	CENPW
4.47175e-54	1.41302	0.84	0.47	7.17223e-50	Neurons	DEK
5.21641e-54	1.02031	0.43	0.109	8.36661e-50	Neurons	TYMS
1.74732e-52	1.44776	0.776	0.425	2.80253e-48	Neurons	TUBB
1.88941e-50	1.12699	0.591	0.201	3.03042e-46	Neurons	CKS2
1.30566e-49	1.01257	0.46	0.128	2.09415e-45	Neurons	NSD2
3.86866e-48	1.22867	0.54	0.188	6.20494e-44	Neurons	TUBB4B
1.09556e-46	1.03876	0.46	0.134	1.75716e-42	Neurons	EZH2
2.4656e-46	1.28452	0.456	0.14	3.95458e-42	Neurons	PCNA
1.50934e-44	1.26938	0.671	0.316	2.42084e-40	Neurons	UTP23
5.18219e-43	1.32743	0.751	0.414	8.31171e-39	Neurons	RAD21
2.04026e-42	1.09192	0.591	0.229	3.27238e-38	Neurons	DNMT1
1.72946e-41	1.14597	0.684	0.302	2.77389e-37	Neurons	ANP32E
8.78468e-41	-1.47855	0.726	0.91	1.40898e-36	Neurons	B2M
6.88621e-37	-1.07404	0.84	0.929	1.10448e-32	Neurons	RPL34
2.16561e-36	1.03477	0.633	0.288	3.47341e-32	Neurons	H2AFV
7.31658e-34	1.07916	0.388	0.124	1.17351e-29	Neurons	MSH2
4.05327e-32	1.20258	0.717	0.435	6.50104e-28	Neurons	ANP32B
3.26772e-31	1.15906	0.447	0.168	5.2411e-27	Neurons	ASRGL1
8.27524e-31	2.44623	0.325	0.097	1.32727e-26	Neurons	WDYHV1
1.61417e-30	1.01196	0.717	0.401	2.58897e-26	Neurons	NASP
1.87424e-30	1.3932	0.616	0.333	3.00609e-26	Neurons	UQCRFS1
3.08117e-30	1.17144	0.591	0.292	4.94189e-26	Neurons	URI1
1.21889e-29	1.12152	0.544	0.249	1.95498e-25	Neurons	ARL6IP1
5.23346e-28	1.52495	0.346	0.113	8.39395e-24	Neurons	CSMD1
1.06675e-27	1.03706	0.819	0.681	1.71096e-23	Neurons	CALM2
1.38514e-26	1.07546	0.692	0.429	2.22162e-22	Neurons	HMGN2
1.73632e-26	1.47238	0.717	0.479	2.78489e-22	Neurons	HIST1H4C
2.43803e-25	3.96762	0.363	0.129	3.91035e-21	Neurons	TMTC2
1.02361e-24	-1.40215	0.819	0.854	1.64176e-20	Neurons	FTL
7.23197e-24	1.30733	0.295	0.095	1.15994e-19	Neurons	SPATA5
2.52895e-23	1.02439	0.637	0.364	4.05619e-19	Neurons	STAG1
2.17503e-22	1.1394	0.578	0.302	3.48853e-18	Neurons	MECOM
8.78195e-21	1.65571	0.414	0.172	1.40854e-16	Neurons	SUZ12
1.74415e-20	-2.26696	0.346	0.574	2.79744e-16	Neurons	CD74
5.12735e-18	1.0812	0.392	0.171	8.22376e-14	Neurons	USP25
1.92035e-17	1.77016	0.325	0.131	3.08006e-13	Neurons	PLEKHH2
2.49507e-17	-1.00839	0.523	0.714	4.00184e-13	Neurons	KLF6
1.82677e-15	1.18571	0.506	0.252	2.92996e-11	Neurons	AL512380.2
3.32081e-15	1.93389	0.456	0.235	5.32624e-11	Neurons	WWOX
1.87615e-14	1.05759	0.426	0.219	3.00915e-10	Neurons	HACD3
2.24086e-14	2.04488	0.262	0.107	3.59411e-10	Neurons	PTPRD
4.45732e-13	-2.29069	0.08	0.283	7.14909e-09	Neurons	SRGN
9.80728e-13	1.04294	0.397	0.202	1.57299e-08	Neurons	SLMAP
2.44371e-12	-1.00506	0.409	0.583	3.91947e-08	Neurons	ZFP36
7.65554e-12	3.97008	0.363	0.181	1.22787e-07	Neurons	CEP85L
7.88896e-12	-2.36118	0.215	0.399	1.26531e-07	Neurons	HLA.DRA
1.09543e-11	-2.18392	0.181	0.363	1.75696e-07	Neurons	HLA.DRB1
2.19694e-11	3.44711	0.308	0.147	3.52366e-07	Neurons	MRPS22
6.39516e-11	1.08265	0.354	0.18	1.02572e-06	Neurons	ZFPM2
7.92727e-11	1.29106	0.3	0.145	1.27145e-06	Neurons	IGF1R
1.61927e-10	2.18776	0.312	0.162	2.59714e-06	Neurons	NCALD
6.31058e-10	-1.57761	0.291	0.425	1.01215e-05	Neurons	TXNIP
1.76771e-09	-1.93261	0.127	0.287	2.83524e-05	Neurons	HLA.DPA1
3.33589e-09	-1.87877	0.135	0.289	5.35043e-05	Neurons	HLA.DPB1
3.39538e-08	-2.06416	0.143	0.297	0.000544585	Neurons	MGP
3.4009e-08	-1.00437	0.544	0.615	0.00054547	Neurons	FTH1
6.86073e-08	-1.3692	0.198	0.341	0.00110039	Neurons	ID2
1.30511e-07	1.00101	0.312	0.174	0.00209326	Neurons	ATF2
1.52227e-07	1.00929	0.439	0.271	0.00244157	Neurons	RCN1
1.59396e-07	-2.07119	0.165	0.307	0.00255656	Neurons	C12orf60
8.73602e-07	-1.01854	0.354	0.442	0.0140117	Neurons	SERPING1
2.05704e-06	-1.18108	0.557	0.607	0.0329928	Neurons	SAT1
2.09627e-06	-1.03036	0.304	0.407	0.033622	Neurons	GADD45B
0	5.41726	0.829	0.037	0	Tissue_stem_cells	RGS5
0	3.0277	0.741	0.037	0	Tissue_stem_cells	MCAM
0	2.20372	0.317	0.002	0	Tissue_stem_cells	FAM162B
0	2.03638	0.463	0.017	0	Tissue_stem_cells	ANGPT2
0	1.96103	0.454	0.015	0	Tissue_stem_cells	GJC1
0	1.62994	0.298	0.002	0	Tissue_stem_cells	HIGD1B
0	1.39236	0.288	0.001	0	Tissue_stem_cells	AVPR1A
5.7598e-267	1.62452	0.351	0.013	9.23814e-263	Tissue_stem_cells	TRPC6
2.23178e-261	1.25744	0.254	0.005	3.57955e-257	Tissue_stem_cells	GJA4
2.25937e-260	3.70434	0.854	0.112	3.6238e-256	Tissue_stem_cells	COL4A1
3.24107e-256	2.65675	0.688	0.067	5.19836e-252	Tissue_stem_cells	NOTCH3
3.41458e-256	2.1413	0.493	0.029	5.47665e-252	Tissue_stem_cells	ADGRF5
4.97896e-253	2.29246	0.444	0.024	7.98575e-249	Tissue_stem_cells	CARMN
1.21406e-252	1.7793	0.424	0.021	1.94723e-248	Tissue_stem_cells	45173
2.06522e-231	2.76813	0.561	0.046	3.31241e-227	Tissue_stem_cells	CCDC102B
2.02866e-208	2.43431	0.639	0.068	3.25377e-204	Tissue_stem_cells	ITGA1
2.97044e-207	2.74814	0.746	0.103	4.76429e-203	Tissue_stem_cells	CBL
2.38405e-202	1.5215	0.298	0.012	3.82377e-198	Tissue_stem_cells	KCNJ8
2.52111e-188	2.78742	0.78	0.125	4.04361e-184	Tissue_stem_cells	COL4A2
2.88178e-186	1.71792	0.454	0.036	4.62208e-182	Tissue_stem_cells	TFPI
3.95525e-184	3.3104	0.946	0.22	6.34383e-180	Tissue_stem_cells	IGFBP7
6.69959e-175	1.98727	0.498	0.048	1.07455e-170	Tissue_stem_cells	GUCY1B3
2.80917e-170	1.81932	0.468	0.043	4.50563e-166	Tissue_stem_cells	PDGFA
6.85948e-167	1.68338	0.361	0.025	1.10019e-162	Tissue_stem_cells	FAM13C
7.41713e-160	1.07352	0.259	0.012	1.18963e-155	Tissue_stem_cells	TBX2
2.06599e-157	1.88636	0.488	0.05	3.31364e-153	Tissue_stem_cells	GUCY1A3
6.15187e-156	1.23969	0.307	0.019	9.86699e-152	Tissue_stem_cells	TBX2.AS1
5.6754e-151	2.1498	0.595	0.082	9.10278e-147	Tissue_stem_cells	PDGFRB
5.9849e-150	2.94705	0.683	0.113	9.59919e-146	Tissue_stem_cells	ACTA2
6.57189e-149	2.23691	0.639	0.096	1.05407e-144	Tissue_stem_cells	EBF1
4.83828e-147	1.94503	0.512	0.062	7.76012e-143	Tissue_stem_cells	PPP1R14A
8.40832e-144	1.73026	0.473	0.052	1.34861e-139	Tissue_stem_cells	JAG1
6.45674e-141	1.86605	0.424	0.043	1.0356e-136	Tissue_stem_cells	SYNPO2
1.00253e-132	2.81719	0.883	0.233	1.60796e-128	Tissue_stem_cells	SPARCL1
1.20797e-131	1.81955	0.288	0.019	1.93747e-127	Tissue_stem_cells	CD36
7.80064e-129	2.31034	0.683	0.133	1.25115e-124	Tissue_stem_cells	LHFPL6
9.51097e-129	2.19957	0.654	0.121	1.52546e-124	Tissue_stem_cells	NR2F2
4.70695e-125	1.7423	0.405	0.044	7.54947e-121	Tissue_stem_cells	GUCY1A2
5.64905e-119	1.99894	0.439	0.055	9.06051e-115	Tissue_stem_cells	ENPEP
4.03549e-116	2.03729	0.585	0.103	6.47252e-112	Tissue_stem_cells	MYO1B
1.66538e-115	2.47469	1	0.511	2.67111e-111	Tissue_stem_cells	CALD1
4.59536e-114	2.39727	0.649	0.129	7.3705e-110	Tissue_stem_cells	DLC1
6.83884e-113	1.55981	0.341	0.034	1.09688e-108	Tissue_stem_cells	PLXDC1
7.35879e-111	1.80584	0.502	0.076	1.18028e-106	Tissue_stem_cells	CHN1
1.00235e-108	2.11792	0.712	0.166	1.60768e-104	Tissue_stem_cells	CAV1
1.58036e-108	2.23241	0.649	0.137	2.53474e-104	Tissue_stem_cells	LAMA4
1.07821e-107	1.58696	0.405	0.05	1.72934e-103	Tissue_stem_cells	EDNRA
4.56415e-107	1.45382	0.351	0.038	7.32044e-103	Tissue_stem_cells	EGFLAM
1.42439e-102	1.75376	0.371	0.043	2.28458e-98	Tissue_stem_cells	ADAMTS4
3.33908e-102	2.38816	0.561	0.104	5.35556e-98	Tissue_stem_cells	STAMBPL1
5.23137e-101	1.99108	0.79	0.208	8.39059e-97	Tissue_stem_cells	A2M
7.19925e-101	1.70767	0.302	0.03	1.15469e-96	Tissue_stem_cells	STEAP4
1.50061e-100	2.15623	0.59	0.121	2.40683e-96	Tissue_stem_cells	EPS8
3.16528e-95	1.64325	0.434	0.064	5.07679e-91	Tissue_stem_cells	NID1
4.23377e-95	2.25342	0.654	0.162	6.79055e-91	Tissue_stem_cells	MYLK
9.38556e-95	2.05113	0.566	0.117	1.50535e-90	Tissue_stem_cells	MYLK.AS1
9.42964e-94	1.49923	0.415	0.059	1.51242e-89	Tissue_stem_cells	MRVI1
5.81973e-93	2.08142	0.59	0.125	9.33427e-89	Tissue_stem_cells	FILIP1L
1.30734e-92	2.31331	0.854	0.317	2.09684e-88	Tissue_stem_cells	TPM1
1.08351e-90	1.68881	0.566	0.116	1.73784e-86	Tissue_stem_cells	EPAS1
4.81798e-90	2.52945	0.756	0.245	7.72756e-86	Tissue_stem_cells	MYL9
9.24844e-86	1.55407	0.502	0.096	1.48336e-81	Tissue_stem_cells	AC007319.1
2.01617e-84	1.7323	0.366	0.052	3.23374e-80	Tissue_stem_cells	LMOD1
7.60778e-82	2.91741	0.39	0.062	1.22021e-77	Tissue_stem_cells	MYH11
5.19838e-79	2.35322	0.78	0.296	8.33768e-75	Tissue_stem_cells	DLGAP4.AS1
3.2641e-78	1.17168	0.273	0.031	5.23529e-74	Tissue_stem_cells	TPPP3
2.14543e-76	1.66795	0.58	0.145	3.44106e-72	Tissue_stem_cells	STOM
4.72606e-75	2.05904	0.6	0.16	7.58013e-71	Tissue_stem_cells	CPE
1.73338e-74	1.33421	0.366	0.057	2.78016e-70	Tissue_stem_cells	OLFML2B
4.51503e-74	1.72429	0.317	0.044	7.24166e-70	Tissue_stem_cells	AC003991.1
7.72624e-73	1.68217	0.932	0.423	1.23921e-68	Tissue_stem_cells	SPARC
1.36315e-71	1.66624	0.488	0.109	2.18636e-67	Tissue_stem_cells	COL18A1
5.90102e-71	1.76044	0.488	0.109	9.46465e-67	Tissue_stem_cells	MCPH1
2.47888e-70	1.13696	0.302	0.042	3.97588e-66	Tissue_stem_cells	RNF152
2.73408e-70	1.34666	0.302	0.041	4.38519e-66	Tissue_stem_cells	TDO2
2.45428e-69	2.43102	0.332	0.052	3.93641e-65	Tissue_stem_cells	NDE1
1.08007e-66	1.59621	0.38	0.068	1.73233e-62	Tissue_stem_cells	PLAC9
1.40207e-64	1.28436	0.293	0.043	2.24879e-60	Tissue_stem_cells	ABCC9
1.51335e-64	2.34693	0.488	0.117	2.42726e-60	Tissue_stem_cells	EGFL6
1.51551e-64	2.14712	0.576	0.163	2.43072e-60	Tissue_stem_cells	ADAMTS1
2.83094e-64	1.82505	0.624	0.174	4.54054e-60	Tissue_stem_cells	CRISPLD2
1.46903e-62	1.49135	0.439	0.098	2.35618e-58	Tissue_stem_cells	MAP3K20.AS1
1.60405e-62	1.4002	0.483	0.118	2.57274e-58	Tissue_stem_cells	SLC19A1
4.96022e-61	1.16722	0.259	0.035	7.9557e-57	Tissue_stem_cells	C11orf96
3.55784e-59	1.91844	0.693	0.26	5.70642e-55	Tissue_stem_cells	TPM2
2.17601e-57	1.42071	0.571	0.164	3.49011e-53	Tissue_stem_cells	ZEB2
3.25254e-57	1.35269	0.512	0.134	5.21675e-53	Tissue_stem_cells	PHLDA1
6.45155e-57	1.71368	0.512	0.144	1.03476e-52	Tissue_stem_cells	PPP1R12B
9.89754e-57	1.10903	0.312	0.054	1.58747e-52	Tissue_stem_cells	EHD2
9.12496e-56	1.36866	0.39	0.081	1.46355e-51	Tissue_stem_cells	TNFAIP6
3.51946e-54	1.38763	0.922	0.573	5.64486e-50	Tissue_stem_cells	AC136475.1
7.7905e-54	1.16348	0.38	0.08	1.24952e-49	Tissue_stem_cells	SYTL2
2.45826e-52	1.23328	0.415	0.095	3.9428e-48	Tissue_stem_cells	INPP4B
8.40372e-52	1.39091	0.893	0.566	1.34787e-47	Tissue_stem_cells	45176
1.08909e-51	1.37273	0.59	0.186	1.74679e-47	Tissue_stem_cells	MEF2C
1.16534e-51	1.44773	0.741	0.305	1.86909e-47	Tissue_stem_cells	CAVIN1
2.98306e-51	1.89157	0.522	0.166	4.78454e-47	Tissue_stem_cells	THY1
4.37954e-51	1.09741	0.259	0.04	7.02435e-47	Tissue_stem_cells	KCNE4
7.92564e-50	1.36798	0.668	0.246	1.27119e-45	Tissue_stem_cells	BGN
8.26768e-49	1.62182	0.541	0.17	1.32605e-44	Tissue_stem_cells	AKAP12
8.8019e-49	1.27845	0.385	0.09	1.41174e-44	Tissue_stem_cells	SEMA5A
2.89911e-47	1.46058	0.541	0.173	4.64989e-43	Tissue_stem_cells	MAP1B
3.56302e-46	1.07616	0.293	0.055	5.71473e-42	Tissue_stem_cells	HOPX
5.95213e-46	1.54735	0.785	0.472	9.54662e-42	Tissue_stem_cells	ITGB1
[truncated: 407 more rows]
